# Supplementary material for: Relation Extraction Based on Fusion Dependency Parsing from Chinese EMRs
Source: Hindawi journal article supplement (doi:10.1155/2020/8658040), 2020-06-08
Supplement: f1 [file 8658040.f1.zip]

Archive with 128 entries (118 files):
- discharge/
- discharge/dischargeEntity/
- discharge/dischargeEntity/discharge1.xml.ent
- discharge/dischargeEntity/discharge10.xml.ent
- discharge/dischargeEntity/discharge11.xml.ent
- discharge/dischargeEntity/discharge12.xml.ent
- discharge/dischargeEntity/discharge13.xml.ent
- discharge/dischargeEntity/discharge14.xml.ent
- discharge/dischargeEntity/discharge15.xml.ent
- discharge/dischargeEntity/discharge2.xml.ent
- discharge/dischargeEntity/discharge3.xml.ent
- discharge/dischargeEntity/discharge4.xml.ent
- discharge/dischargeEntity/discharge5.xml.ent
- discharge/dischargeEntity/discharge6.xml.ent
- discharge/dischargeEntity/discharge7.xml.ent
- discharge/dischargeEntity/discharge8.xml.ent
- discharge/dischargeEntity/discharge9.xml.ent
- discharge/dischargeRelation/
- discharge/dischargeRelation/discharge1.xml.rel
- discharge/dischargeRelation/discharge10.xml.rel
- discharge/dischargeRelation/discharge11.xml.rel
- discharge/dischargeRelation/discharge12.xml.rel
- discharge/dischargeRelation/discharge13.xml.rel
- discharge/dischargeRelation/discharge14.xml.rel
- discharge/dischargeRelation/discharge15.xml.rel
- discharge/dischargeRelation/discharge3.xml.rel
- discharge/dischargeRelation/discharge5.xml.rel
- discharge/dischargeRelation/discharge6.xml.rel
- discharge/dischargeRelation/discharge7.xml.rel
- discharge/dischargeRelation/discharge8.xml.rel
- discharge/dischargeRelation/discharge9.xml.rel
- discharge/text/
- discharge/text/discharge71.xml
- discharge/text/discharge72.xml
- discharge/text/discharge73.xml
- discharge/text/discharge74.xml
- discharge/text/discharge75.xml
- discharge/text/discharge76.xml
- discharge/text/discharge77.xml
- discharge/text/discharge78.xml
- discharge/text/discharge79.xml
- discharge/text/discharge80.xml
- discharge/text/discharge81.xml
- discharge/text/discharge82.xml
- discharge/text/discharge83.xml
- discharge/text/discharge84.xml
- discharge/text/discharge85.xml
- discharge/train/
- discharge/train/discharge1.xml
- discharge/train/discharge10.xml
- discharge/train/discharge11.xml
- discharge/train/discharge12.xml
- discharge/train/discharge13.xml
- discharge/train/discharge14.xml
- discharge/train/discharge15.xml
- discharge/train/discharge2.xml
- discharge/train/discharge3.xml
- discharge/train/discharge4.xml
- discharge/train/discharge5.xml
- discharge/train/discharge6.xml
- discharge/train/discharge7.xml
- discharge/train/discharge8.xml
- discharge/train/discharge9.xml
- progress/
- progress/progressEntity/
- progress/progressEntity/progress1.xml.ent
- progress/progressEntity/progress10.xml.ent
- progress/progressEntity/progress11.xml.ent
- progress/progressEntity/progress12.xml.ent
- progress/progressEntity/progress13.xml.ent
- progress/progressEntity/progress14.xml.ent
- progress/progressEntity/progress15.xml.ent
- progress/progressEntity/progress2.xml.ent
- progress/progressEntity/progress3.xml.ent
- progress/progressEntity/progress4.xml.ent
- progress/progressEntity/progress5.xml.ent
- progress/progressEntity/progress6.xml.ent
- progress/progressEntity/progress7.xml.ent
- progress/progressEntity/progress8.xml.ent
- progress/progressEntity/progress9.xml.ent
- progress/progressRelation/
- progress/progressRelation/progress1.xml.rel
- progress/progressRelation/progress10.xml.rel
- progress/progressRelation/progress11.xml.rel
- progress/progressRelation/progress13.xml.rel
- progress/progressRelation/progress14.xml.rel
- progress/progressRelation/progress15.xml.rel
- progress/progressRelation/progress2.xml.rel
- progress/progressRelation/progress3.xml.rel
- progress/progressRelation/progress4.xml.rel
- progress/progressRelation/progress5.xml.rel
- progress/progressRelation/progress6.xml.rel
- progress/progressRelation/progress7.xml.rel
- progress/progressRelation/progress8.xml.rel
- progress/progressRelation/progress9.xml.rel
- progress/text/
- progress/text/progress101.xml
- progress/text/progress102.xml
- progress/text/progress103.xml
- progress/text/progress104.xml
- progress/text/progress105.xml
- progress/text/progress106.xml
- progress/text/progress107.xml
- progress/text/progress108.xml
- progress/text/progress109.xml
- progress/text/progress110.xml
- progress/text/progress111.xml
- progress/text/progress112.xml
- progress/text/progress113.xml
- progress/text/progress114.xml
- progress/text/progress115.xml
- progress/train/
- progress/train/progress1.xml
- progress/train/progress10.xml
- progress/train/progress11.xml
- progress/train/progress12.xml
- progress/train/progress13.xml
- progress/train/progress14.xml
- progress/train/progress15.xml
- progress/train/progress2.xml
- progress/train/progress3.xml
- progress/train/progress4.xml
- progress/train/progress5.xml
- progress/train/progress6.xml
- progress/train/progress7.xml
- progress/train/progress8.xml
- progress/train/progress9.xml
- readme.txt
