# Supplementary material for: Relation Extraction Based on Fusion Dependency Parsing from Chinese EMRs
Source: Hindawi journal article supplement (doi:10.1155/2020/8658040), 2020-06-08
Supplement: f1 [file 8658040.f1.zip › discharge/dischargeEntity/discharge1.xml.ent]

C=发热 P=73:75 T=symptom A=present
C=咳嗽 P=78:80 T=symptom A=present
C=T P=112:113 T=test
C=黄染 P=126:128 T=symptom A=absent
C=咽部充血 P=138:142 T=symptom A=present
C=扁桃体明显红肿 P=143:150 T=symptom A=present
C=双肺呼吸音粗 P=155:161 T=symptom A=present
C=干湿罗音 P=166:170 T=symptom A=absent
C=心率 P=182:184 T=test
C=P2 P=193:195 T=test
C=杂音 P=211:213 T=symptom A=absent
C=腹壁静脉曲张 P=221:227 T=symptom A=absent
C=压痛 P=231:233 T=symptom A=absent
C=反跳痛 P=234:237 T=symptom A=absent
C=肌紧张 P=238:241 T=symptom A=absent
C=急性支气管炎 P=300:306 T=disease A=present
C=头孢呋辛 P=334:338 T=treatment A=present
C=抗感染 P=338:341 T=treatment A=present
C=阿糖腺苷 P=342:346 T=treatment A=present
C=抗病毒 P=346:349 T=treatment A=present
C=布地奈德 P=350:354 T=treatment A=present
C=雾化 P=354:356 T=treatment A=present
C=补液 P=357:359 T=treatment A=present
C=对症治疗 P=360:364 T=treatment A=present
C=咳嗽 P=373:375 T=symptom A=present
C=皮疹 P=380:382 T=symptom A=present
C=急性支气管炎 P=420:426 T=disease A=present
C=幼儿急疹 P=428:432 T=disease A=present
C=皮疹 P=461:463 T=symptom A=present
C=咳嗽 P=468:470 T=symptom A=present
C=气急 P=476:478 T=symptom A=absent
C=呼吸困难 P=479:483 T=symptom A=absent
C=呕吐 P=485:487 T=symptom A=absent
C=腹泻 P=488:490 T=symptom A=absent
C=腹痛 P=491:493 T=symptom A=absent
C=T P=542:543 T=test
C=黄染 P=556:558 T=symptom A=absent
C=红色斑丘疹 P=567:572 T=symptom A=present
C=红肿 P=593:595 T=symptom A=absent
C=红肿 P=602:604 T=symptom A=absent
C=干湿罗音 P=620:624 T=symptom A=absent
C=心率 P=636:638 T=test
C=P2 P=647:649 T=test
C=杂音 P=665:667 T=symptom A=absent
C=腹壁静脉曲张 P=675:681 T=symptom A=absent
C=压痛 P=685:687 T=symptom A=absent
C=反跳痛 P=688:691 T=symptom A=absent
C=肌紧张 P=692:695 T=symptom A=absent
C=头孢克洛干混悬剂 P=783:791 T=treatment A=present
C=百咳静糖浆 P=805:810 T=treatment A=present
