# Supplementary material for: Relation Extraction Based on Fusion Dependency Parsing from Chinese EMRs
Source: Hindawi journal article supplement (doi:10.1155/2020/8658040), 2020-06-08
Supplement: f1 [file 8658040.f1.zip › discharge/dischargeEntity/discharge2.xml.ent]

C=皮肤黄染 P=74:78 T=symptom A=present
C=T P=99:100 T=test
C=黄染 P=113:115 T=symptom A=present
C=充血 P=133:135 T=symptom A=absent
C=心率 P=163:165 T=test
C=P2 P=174:176 T=test
C=杂音 P=192:194 T=symptom A=absent
C=腹壁静脉曲张 P=202:208 T=symptom A=absent
C=包块 P=213:215 T=symptom A=absent
C=新生儿高胆红素血症 P=263:272 T=disease A=present
C=蓝光退黄 P=300:304 T=treatment A=present
C=SB纠酸 P=305:309 T=treatment A=present
C=头孢地秦 P=310:314 T=treatment A=present
C=抗感染 P=314:317 T=treatment A=present
C=补液 P=318:320 T=treatment A=present
C=新生儿高胆红素血症 P=360:369 T=disease A=present
C=低蛋白血症 P=371:376 T=disease A=present
C=黄染 P=403:405 T=symptom A=absent
C=心率 P=412:414 T=test
C=呼吸 P=415:417 T=test
C=激惹 P=421:423 T=symptom A=absent
C=尖叫 P=424:426 T=symptom A=absent
C=抽搐 P=427:429 T=symptom A=absent
C=T P=452:453 T=test
C=头面部黄染 P=459:464 T=symptom A=absent
C=充血 P=480:482 T=symptom A=absent
C=心率 P=510:512 T=test
C=P2 P=521:523 T=test
C=杂音 P=539:541 T=symptom A=absent
C=腹壁静脉曲张 P=549:555 T=symptom A=absent
C=包块 P=560:562 T=symptom A=absent
C=TCB P=648:651 T=test
