# Supplementary material for: Relation Extraction Based on Fusion Dependency Parsing from Chinese EMRs
Source: Hindawi journal article supplement (doi:10.1155/2020/8658040), 2020-06-08
Supplement: f1 [file 8658040.f1.zip › discharge/dischargeEntity/discharge3.xml.ent]

C=胸痛 P=71:73 T=symptom A=present
C=咳嗽 P=74:76 T=symptom A=present
C=咳痰 P=76:78 T=symptom A=present
C=胸痛 P=101:103 T=symptom A=present
C=胸痛 P=104:106 T=symptom A=present
C=咳嗽 P=112:114 T=symptom A=present
C=咳痰 P=115:117 T=symptom A=present
C=纳差 P=127:129 T=symptom A=present
C=乏力 P=130:132 T=symptom A=present
C=畏寒 P=134:136 T=symptom A=absent
C=寒战 P=137:139 T=symptom A=absent
C=呼吸困难 P=141:145 T=symptom A=absent
C=恶心 P=147:149 T=symptom A=absent
C=呕吐 P=150:152 T=symptom A=absent
C=腹痛 P=153:155 T=symptom A=absent
C=腹泻 P=156:158 T=symptom A=absent
C=尿频 P=160:162 T=symptom A=absent
C=尿急 P=163:165 T=symptom A=absent
C=尿痛 P=166:168 T=symptom A=absent
C=头痛 P=170:172 T=symptom A=absent
C=头晕 P=173:175 T=symptom A=absent
C=皮疹 P=177:179 T=symptom A=absent
C=关节痛 P=180:183 T=symptom A=absent
C=血常规 P=195:198 T=test
C=WBC P=199:202 T=test
C=N P=213:214 T=test
C=CRP P=225:228 T=test
C=PCT P=236:239 T=test
C=胸部CT P=249:253 T=test
C=右肺上叶炎性病变 P=254:262 T=disease A=present
C=结核 P=265:267 T=disease A=hypothetical
C=炎症 P=284:286 T=disease A=present
C=两肺局限性肺气肿 P=287:295 T=symptom A=present
C=食欲差 P=315:318 T=symptom A=present
C=精神状态差 P=319:324 T=symptom A=present
C=肺部感染 P=359:363 T=disease A=present
C=左氧氟沙星 P=391:396 T=treatment A=present
C=头孢美唑 P=397:401 T=treatment A=present
C=经验性抗感染治疗 P=401:409 T=treatment A=present
C=营养支持 P=410:414 T=treatment A=present
C=复方维生素 P=415:420 T=treatment A=present
C=改善心肌代谢 P=422:428 T=treatment A=present
C=左卡尼丁 P=429:433 T=treatment A=present
C=社区获得性肺炎 P=470:477 T=disease A=present
C=预防感染 P=576:580 T=treatment A=present
