# Supplementary material for: Relation Extraction Based on Fusion Dependency Parsing from Chinese EMRs
Source: Hindawi journal article supplement (doi:10.1155/2020/8658040), 2020-06-08
Supplement: f1 [file 8658040.f1.zip › discharge/dischargeEntity/discharge4.xml.ent]

C=气管造口状态呼吸机依赖 P=85:96 T=disease A=present
C=脑梗死后遗症 P=98:104 T=disease A=present
C=混合性痴呆 P=104:109 T=disease A=present
C=症状性癫痫 P=109:114 T=disease A=present
C=冠状动脉粥样硬化性心脏病 P=116:128 T=disease A=present
C=心律失常 P=128:132 T=disease A=present
C=阵发性房颤 P=133:138 T=disease A=present
C=心功能III级 P=138:145 T=disease A=present
C=2型糖尿病 P=153:158 T=disease A=present
C=慢性阻塞性肺病稳定期 P=160:170 T=disease A=present
C=便秘 P=172:174 T=disease A=present
C=前列腺增生慢性膀胱炎 P=176:186 T=disease A=present
C=低蛋白血症双侧胸腔积液 P=188:199 T=disease A=present
C=肝功能不全 P=201:206 T=disease A=present
C=中度贫血 P=209:213 T=disease A=present
C=心电监护 P=241:245 T=treatment A=present
C=呼吸机辅助通气 P=246:253 T=treatment A=present
C=f P=261:262 T=test
C=Vt4 P=268:271 T=test
C=压力支持 P=276:280 T=test
C=PEEP P=288:292 T=test
C=氧浓度 P=299:302 T=test
C=化痰 P=316:318 T=treatment A=present
C=氨溴索 P=319:322 T=treatment A=present
C=保肝 P=324:326 T=treatment A=present
C=复方甘草酸苷 P=327:333 T=treatment A=present
C=监测血糖 P=335:339 T=treatment A=present
C=抗板聚集 P=340:344 T=treatment A=present
C=阿司匹林 P=345:349 T=treatment A=present
C=控制心室率 P=351:356 T=treatment A=present
C=强心 P=357:359 T=treatment A=present
C=地高辛 P=360:363 T=treatment A=present
C=提升血色素 P=365:370 T=treatment A=present
C=促红素 P=371:374 T=treatment A=present
C=营养支持治疗 P=376:382 T=treatment A=present
C=促胃肠动力 P=383:388 T=treatment A=present
C=伊托必利 P=389:393 T=treatment A=present
C=通便 P=395:397 T=treatment A=present
C=乳果糖 P=398:401 T=treatment A=present
C=调节肠道菌群 P=403:409 T=treatment A=present
C=米雅 P=410:412 T=treatment A=present
C=奥卡西平 P=414:418 T=treatment A=present
C=胸腺肽α1 P=421:426 T=treatment A=present
C=增强免疫力 P=426:431 T=treatment A=present
C=气管造口状态呼吸机依赖 P=465:476 T=disease A=present
C=脑梗死后遗症 P=478:484 T=disease A=present
C=混合性痴呆 P=484:489 T=disease A=present
C=症状性癫痫 P=489:494 T=disease A=present
C=冠状动脉粥样硬化性心脏病 P=496:508 T=disease A=present
C=心律失常 P=508:512 T=disease A=present
C=阵发性房颤 P=513:518 T=disease A=present
C=心功能III级 P=518:525 T=disease A=present
C=2型糖尿病 P=533:538 T=disease A=present
C=慢性阻塞性肺病稳定期 P=540:550 T=disease A=present
C=便秘 P=552:554 T=disease A=present
C=前列腺增生慢性膀胱炎 P=556:566 T=disease A=present
C=低蛋白血症双侧胸腔积液 P=568:579 T=disease A=present
C=肝功能不全 P=581:586 T=disease A=present
C=中度贫血 P=589:593 T=disease A=present
C=发热 P=612:614 T=symptom A=absent
C=咳嗽 P=618:620 T=symptom A=absent
C=咳痰 P=621:623 T=symptom A=absent
C=气促 P=625:627 T=symptom A=absent
C=呕吐 P=635:637 T=symptom A=absent
C=血压 P=648:650 T=test
C=心率 P=661:663 T=test
C=指末氧 P=672:675 T=test
C=心电图 P=723:726 T=test
C=Holter P=727:733 T=test
C=胸片 P=734:736 T=test
C=肝肾功能 P=737:741 T=test
C=甲状腺功能 P=742:747 T=test
C=电解质 P=748:751 T=test
C=恶性肿瘤 P=777:781 T=disease A=hypothetical
C=癌栓猝死 P=806:810 T=disease A=possible
C=加强营养支持 P=844:850 T=treatment A=present
C=褥疮 P=858:860 T=disease A=possible
C=肺炎 P=861:863 T=disease A=possible
C=排痰 P=889:891 T=treatment A=present
C=关节脱位 P=937:941 T=disease A=possible
C=骨折 P=942:944 T=disease A=possible
