# Supplementary material for: Relation Extraction Based on Fusion Dependency Parsing from Chinese EMRs
Source: Hindawi journal article supplement (doi:10.1155/2020/8658040), 2020-06-08
Supplement: f1 [file 8658040.f1.zip › discharge/dischargeEntity/discharge5.xml.ent]

C=T P=74:75 T=test
C=P P=81:82 T=test
C=BP P=88:90 T=test
C=呼吸机辅助通气 P=104:111 T=treatment A=present
C=干湿罗音 P=136:140 T=symptom A=absent
C=杂音 P=149:151 T=symptom A=absent
C=压痛 P=157:159 T=symptom A=absent
C=反跳痛 P=159:162 T=symptom A=absent
C=双下肢膝关节屈曲僵硬 P=170:180 T=symptom A=present
C=气管造口状态呼吸机依赖 P=199:210 T=disease A=present
C=脑梗死后遗症 P=212:218 T=disease A=present
C=混合性痴呆 P=218:223 T=disease A=present
C=症状性癫痫 P=223:228 T=disease A=present
C=冠状动脉粥样硬化性心脏病 P=230:242 T=disease A=present
C=心律失常 P=242:246 T=disease A=present
C=阵发性房颤 P=247:252 T=disease A=present
C=心功能III级 P=252:259 T=disease A=present
C=2型糖尿病 P=267:272 T=disease A=present
C=慢性阻塞性肺病稳定期 P=274:284 T=disease A=present
C=前列腺增生慢性膀胱炎 P=286:296 T=disease A=present
C=低蛋白血症双侧胸腔积液 P=298:309 T=disease A=present
C=肝功能不全 P=311:316 T=disease A=present
C=中度贫血 P=318:322 T=disease A=present
C=保肝 P=350:352 T=treatment A=present
C=复方甘草酸苷 P=353:359 T=treatment A=present
C=控制血糖 P=360:364 T=treatment A=present
C=伏格列波糖 P=365:370 T=treatment A=present
C=胰岛素N P=371:375 T=treatment A=present
C=抗板聚集 P=376:380 T=treatment A=present
C=阿司匹林 P=381:385 T=treatment A=present
C=强心 P=392:394 T=treatment A=present
C=地高辛 P=395:398 T=treatment A=present
C=提升血色素 P=399:404 T=treatment A=present
C=促红素 P=405:408 T=treatment A=present
C=营养支持治疗 P=409:415 T=treatment A=present
C=促胃肠动力 P=416:421 T=treatment A=present
C=伊托必利 P=422:426 T=treatment A=present
C=调节肠道菌群 P=427:433 T=treatment A=present
C=米雅 P=434:436 T=treatment A=present
C=减轻胸腔积液 P=439:445 T=treatment A=present
C=呋塞米 P=446:449 T=treatment A=present
C=螺内酯 P=450:453 T=treatment A=present
C=奥卡西平止痫 P=454:460 T=treatment A=present
C=胸腺肽α1 P=461:466 T=treatment A=present
C=对症支持 P=472:476 T=treatment A=present
C=气管造口状态呼吸机依赖 P=517:528 T=disease A=present
C=脑梗死后遗症 P=530:536 T=disease A=present
C=混合性痴呆 P=536:541 T=disease A=present
C=症状性癫痫 P=541:546 T=disease A=present
C=冠状动脉粥样硬化性心脏病 P=548:560 T=disease A=present
C=心律失常 P=560:564 T=disease A=present
C=阵发性房颤 P=565:570 T=disease A=present
C=心功能III级 P=570:577 T=disease A=present
C=2型糖尿病 P=585:590 T=disease A=present
C=慢性阻塞性肺病稳定期 P=592:602 T=disease A=present
C=前列腺增生慢性膀胱炎 P=604:614 T=disease A=present
C=低蛋白血症双侧胸腔积液 P=616:627 T=disease A=present
C=肝功能不全 P=629:634 T=disease A=present
C=中度贫血 P=636:640 T=disease A=present
C=心电监护 P=663:667 T=test
C=心率 P=668:670 T=test
C=血压 P=671:673 T=test
C=指末氧 P=674:677 T=test
C=Bp P=698:700 T=test
C=心率 P=720:722 T=test
C=压痛 P=737:739 T=symptom A=absent
C=反跳痛 P=739:742 T=symptom A=absent
C=心电图 P=776:779 T=test
C=Holter P=780:786 T=test
C=胸片 P=787:789 T=test
C=肝肾功能 P=790:794 T=test
C=甲状腺功能 P=795:800 T=test
C=电解质 P=801:804 T=test
C=肿瘤标记物 P=805:810 T=test
C=恶性肿瘤 P=830:834 T=disease A=hypothetical
C=癌栓猝死 P=859:863 T=disease A=possible
C=营养支持 P=899:903 T=treatment A=present
C=褥疮 P=911:913 T=disease A=possible
C=肺炎 P=914:916 T=disease A=possible
C=排痰 P=942:944 T=treatment A=present
C=关节脱位 P=990:994 T=disease A=possible
C=骨折 P=995:997 T=disease A=possible
