# Supplementary material for: Relation Extraction Based on Fusion Dependency Parsing from Chinese EMRs
Source: Hindawi journal article supplement (doi:10.1155/2020/8658040), 2020-06-08
Supplement: f1 [file 8658040.f1.zip › discharge/dischargeEntity/discharge6.xml.ent]

C=血压升高 P=68:72 T=symptom A=present
C=头晕 P=77:79 T=symptom A=present
C=BP P=108:110 T=test
C=R P=122:123 T=test
C=黄染 P=137:139 T=symptom A=absent
C=肝掌 P=141:143 T=symptom A=absent
C=蜘蛛痣 P=144:147 T=symptom A=absent
C=肿大 P=156:158 T=symptom A=absent
C=发绀 P=163:165 T=symptom A=absent
C=抵抗 P=169:171 T=symptom A=absent
C=怒张 P=191:193 T=symptom A=absent
C=肿大 P=208:210 T=symptom A=absent
C=湿罗音 P=224:227 T=symptom A=present
C=心率 P=237:239 T=test
C=P2 P=248:250 T=test
C=病理性杂音 P=262:267 T=symptom A=absent
C=心包摩擦音 P=269:274 T=symptom A=absent
C=腹壁静脉曲张 P=291:297 T=symptom A=absent
C=压痛 P=304:306 T=symptom A=absent
C=反跳痛 P=307:310 T=symptom A=absent
C=浮肿 P=356:358 T=symptom A=absent
C=脑动脉供血不足 P=405:412 T=disease A=present
C=心包积液 P=414:418 T=disease A=present
C=胸腔积液 P=420:424 T=disease A=present
C=高血压3级 P=426:431 T=disease A=present
C=高血压性心脏病 P=435:442 T=disease A=present
C=心律失常 P=442:446 T=disease A=present
C=阵发性房颤 P=447:452 T=disease A=present
C=心功能III级 P=452:459 T=disease A=present
C=冠状动脉粥样硬化性心脏病 P=467:479 T=disease A=present
C=心功能III级 P=479:486 T=disease A=present
C=重度骨质疏松腰椎骨折 P=494:504 T=disease A=present
C=前列腺恶性肿瘤 P=506:513 T=disease A=present
C=便秘 P=521:523 T=disease A=present
C=白细胞减少症 P=525:531 T=disease A=present
C=失眠 P=534:536 T=disease A=present
C=维持窦律 P=564:568 T=treatment A=present
C=胺碘酮 P=569:572 T=treatment A=present
C=增强免疫力 P=574:579 T=treatment A=present
C=胸腺法新 P=580:584 T=treatment A=present
C=平喘化痰 P=586:590 T=treatment A=present
C=孟鲁斯特 P=591:595 T=treatment A=present
C=氨溴索 P=596:599 T=treatment A=present
C=调节胃肠道 P=601:606 T=treatment A=present
C=酪酸梭菌活菌片 P=607:614 T=treatment A=present
C=莫沙必利片 P=615:620 T=treatment A=present
C=复方阿嗪米特肠溶片 P=621:630 T=treatment A=present
C=埃索美拉唑 P=631:636 T=treatment A=present
C=通便 P=638:640 T=treatment A=present
C=当归龙荟 P=641:645 T=treatment A=present
C=改善头晕 P=647:651 T=treatment A=present
C=倍他司汀 P=657:661 T=treatment A=present
C=加味天麻胶囊 P=662:668 T=treatment A=present
C=助眠 P=670:672 T=treatment A=present
C=喹硫平 P=673:676 T=treatment A=present
C=唑吡坦 P=677:680 T=treatment A=present
C=氟他胺拮抗雄激素 P=682:690 T=treatment A=present
C=抑制肿瘤细胞生长 P=691:699 T=treatment A=present
C=改善排尿症状 P=700:706 T=treatment A=present
C=多沙唑嗪 P=707:711 T=treatment A=present
C=氟他胺片 P=712:716 T=treatment A=present
C=玉屏风 P=718:721 T=treatment A=present
C=对症支持治疗 P=724:730 T=treatment A=present
C=胸腔穿刺 P=733:737 T=treatment A=present
C=脑动脉供血不足 P=771:778 T=disease A=present
C=胸腔积液 P=780:784 T=disease A=present
C=高血压3级 P=786:791 T=disease A=present
C=高血压性心脏病 P=795:802 T=disease A=present
C=心律失常 P=802:806 T=disease A=present
C=阵发性房颤 P=807:812 T=disease A=present
C=心功能III级 P=812:819 T=disease A=present
C=冠状动脉粥样硬化性心脏病 P=827:839 T=disease A=present
C=心功能III级 P=839:846 T=disease A=present
C=重度骨质疏松腰椎骨折 P=854:864 T=disease A=present
C=前列腺恶性肿瘤 P=866:873 T=disease A=present
C=便秘 P=881:883 T=disease A=present
C=白细胞减少症 P=885:891 T=disease A=present
C=失眠 P=893:895 T=disease A=present
C=头晕 P=914:916 T=symptom A=present
C=湿罗音 P=963:966 T=symptom A=present
C=杂音 P=975:977 T=symptom A=absent
C=压痛 P=982:984 T=symptom A=absent
C=浮肿 P=989:991 T=symptom A=absent
C=戒烟限酒 P=1096:1100 T=treatment A=present
C=前列腺疾病 P=1114:1119 T=disease A=present
C=尿路感染 P=1143:1147 T=disease A=possible
C=少吃刺激性食物 P=1150:1157 T=treatment A=present
C=忌烟酒 P=1158:1161 T=treatment A=present
C=脑供血不足 P=1163:1168 T=disease A=present
C=骨质疏松 P=1267:1271 T=disease A=present
C=骨质疏松 P=1287:1291 T=disease A=possible
C=骨折 P=1429:1431 T=disease A=possible
