# Supplementary material for: Relation Extraction Based on Fusion Dependency Parsing from Chinese EMRs
Source: Hindawi journal article supplement (doi:10.1155/2020/8658040), 2020-06-08
Supplement: f1 [file 8658040.f1.zip › discharge/dischargeEntity/discharge7.xml.ent]

C=胸闷 P=63:65 T=symptom A=present
C=心悸 P=65:67 T=symptom A=present
C=BP P=77:79 T=test
C=发绀 P=101:103 T=symptom A=absent
C=怒张 P=108:110 T=symptom A=absent
C=肿大 P=125:127 T=symptom A=absent
C=湿性罗音 P=142:146 T=symptom A=absent
C=心率 P=153:155 T=test
C=病理性杂音 P=167:172 T=symptom A=absent
C=压痛 P=179:181 T=symptom A=absent
C=跳痛 P=183:185 T=symptom A=absent
C=水肿 P=190:192 T=symptom A=absent
C=心律失常 P=211:215 T=disease A=present
C=不完全右束支传导阻滞 P=215:225 T=disease A=present
C=房性早搏 P=227:231 T=disease A=occasional
C=2型糖尿病 P=233:238 T=disease A=present
C=脂肪肝 P=240:243 T=disease A=present
C=心律失常 P=312:316 T=disease A=present
C=不完全右束支传导阻滞 P=316:326 T=disease A=present
C=房性早搏 P=328:332 T=disease A=occasional
C=2型糖尿病 P=334:339 T=disease A=present
C=脂肪肝 P=341:344 T=disease A=present
C=戒烟 P=507:509 T=treatment A=present
C=高血压 P=700:703 T=disease A=present
C=低盐饮食 P=704:708 T=treatment A=present
C=降压药物 P=731:735 T=treatment A=present
C=血压 P=791:793 T=test
C=冠心病 P=806:809 T=disease A=present
C=低脂饮食 P=810:814 T=treatment A=present
C=血压 P=833:835 T=test
C=血糖 P=836:838 T=test
C=血脂 P=839:841 T=test
C=氯吡格雷 P=888:892 T=treatment A=present
C=心律失常 P=903:907 T=disease A=present
C=抗心律失常药物 P=928:935 T=treatment A=present
C=心电图 P=940:943 T=test
C=Holter P=944:950 T=test
C=胺碘酮 P=976:979 T=treatment A=present
C=甲状腺功能 P=988:993 T=test
C=胸片 P=994:996 T=test
C=房颤 P=998:1000 T=disease A=present
C=华法林 P=1005:1008 T=treatment A=present
C=血凝常规 P=1020:1024 T=test
C=华法林 P=1037:1040 T=treatment A=present
C=心力衰竭 P=1057:1061 T=disease A=present
C=血压 P=1073:1075 T=test
C=心衰 P=1087:1089 T=disease A=possible
C=胸闷 P=1152:1154 T=symptom A=possible
C=气促 P=1155:1157 T=symptom A=possible
C=肺炎链球菌 P=1214:1219 T=treatment A=present
C=流感疫苗 P=1220:1224 T=treatment A=present
C=肥厚梗阻性心肌病 P=1226:1234 T=disease A=present
C=洋地黄 P=1240:1243 T=treatment A=absent
C=硝酸酯 P=1248:1251 T=treatment A=absent
C=心超 P=1285:1287 T=test
C=硝酸异山梨酯片 P=1375:1382 T=treatment A=present
C=硝酸甘油 P=1383:1387 T=treatment A=present
C=胸闷痛 P=1391:1394 T=symptom A=possible
