# Supplementary material for: Relation Extraction Based on Fusion Dependency Parsing from Chinese EMRs
Source: Hindawi journal article supplement (doi:10.1155/2020/8658040), 2020-06-08
Supplement: f1 [file 8658040.f1.zip › discharge/dischargeEntity/discharge8.xml.ent]

C=左眼渐进性视物模糊 P=61:70 T=disease A=present
C=眼科检查 P=77:81 T=test
C=VD P=82:84 T=test
C=VS P=100:102 T=test
C=充血 P=122:124 T=symptom A=absent
C=混浊 P=163:165 T=symptom A=present
C=眼底 P=167:169 T=test
C=右眼黄斑萎缩 P=170:176 T=symptom A=present
C=出血 P=177:179 T=symptom A=present
C=玻璃体腔混浊 P=199:205 T=symptom A=present
C=眼压 P=219:221 T=test
C=双眼老年性白内障 P=260:268 T=disease A=present
C=双眼屈光不正 P=270:276 T=disease A=present
C=右眼黄斑变性 P=278:284 T=disease A=present
C=局麻 P=323:325 T=treatment A=present
C=左眼Phaco P=328:335 T=treatment A=present
C=IOL植入术 P=336:342 T=treatment A=present
C=妥布霉素地塞米松眼液 P=379:389 T=treatment A=present
C=托吡卡胺眼液 P=390:396 T=treatment A=present
C=眼内反应 P=404:408 T=symptom A=present
C=双眼老年性白内障 P=455:463 T=disease A=present
C=双眼屈光不正 P=465:471 T=disease A=present
C=右眼黄斑变性 P=473:479 T=disease A=present
C=眼科检查 P=504:508 T=test
C=左眼结膜反应性充血 P=522:531 T=symptom A=present
C=忌剧烈运动 P=635:640 T=treatment A=present
C=忌辛辣刺激食物 P=647:654 T=treatment A=present
C=避免强光刺激 P=655:661 T=treatment A=present
C=避免污水入眼 P=662:668 T=treatment A=present
C=妥布霉素地塞米松眼液 P=675:685 T=treatment A=present
C=托吡卡胺眼液 P=703:709 T=treatment A=present
C=普拉洛芬滴眼液 P=727:734 T=treatment A=present
C=左氧氟沙星眼用凝胶 P=752:761 T=treatment A=present
