# Supplementary material for: Relation Extraction Based on Fusion Dependency Parsing from Chinese EMRs
Source: Hindawi journal article supplement (doi:10.1155/2020/8658040), 2020-06-08
Supplement: f1 [file 8658040.f1.zip › discharge/dischargeEntity/discharge9.xml.ent]

C=甲状腺手术 P=60:65 T=treatment A=history
C=抽搐 P=72:74 T=symptom A=present
C=T P=81:82 T=test
C=P P=89:90 T=test
C=R P=97:98 T=test
C=BP P=105:107 T=test
C=肿大 P=139:141 T=symptom A=absent
C=压痛 P=143:145 T=symptom A=absent
C=震颤 P=146:148 T=symptom A=absent
C=血管杂音 P=149:153 T=symptom A=absent
C=湿性罗音 P=171:175 T=symptom A=absent
C=心率 P=177:179 T=test
C=病理性杂音 P=197:202 T=symptom A=absent
C=压痛 P=213:215 T=symptom A=absent
C=反跳痛 P=216:219 T=symptom A=absent
C=浮肿 P=232:234 T=symptom A=absent
C=结节性甲状腺肿 P=263:270 T=disease A=present
C=甲状旁腺功能减退症 P=273:282 T=disease A=present
C=原发性甲状腺功能减退症 P=283:294 T=disease A=present
C=冠状动脉粥样硬化性心脏病 P=296:308 T=disease A=present
C=PCI术后 P=309:314 T=disease A=absent
C=心功能II级 P=315:321 T=disease A=present
C=高血压病 P=329:333 T=disease A=present
C=慢性支气管炎 P=342:348 T=disease A=present
C=补钙 P=376:378 T=treatment A=present
C=补充维生素D P=379:385 T=treatment A=present
C=抗感染 P=386:389 T=treatment A=present
C=头孢他啶 P=390:394 T=treatment A=present
C=化痰 P=396:398 T=treatment A=present
C=氨溴索 P=399:402 T=treatment A=present
C=平喘 P=404:406 T=treatment A=present
C=孟鲁司特 P=407:411 T=treatment A=present
C=甲泼尼龙 P=412:416 T=treatment A=present
C=扩冠 P=418:420 T=treatment A=present
C=单硝酸异山梨酯 P=421:428 T=treatment A=present
C=降压 P=430:432 T=treatment A=present
C=硝苯地平阿罗洛尔 P=433:441 T=treatment A=present
C=护胃 P=443:445 T=treatment A=present
C=埃索美拉唑 P=446:451 T=treatment A=present
C=多潘立酮 P=452:456 T=treatment A=present
C=活血 P=458:460 T=treatment A=present
C=丹参 P=461:463 T=treatment A=present
C=结节性甲状腺肿 P=506:513 T=disease A=present
C=甲状旁腺功能减退症 P=516:525 T=disease A=present
C=原发性甲状腺功能减退症 P=526:537 T=disease A=present
C=冠状动脉粥样硬化性心脏病 P=539:551 T=disease A=present
C=PCI术后 P=552:557 T=disease A=present
C=心功能II级 P=558:564 T=disease A=present
C=高血压病 P=572:576 T=disease A=present
C=慢性支气管炎 P=585:591 T=disease A=present
