# Supplementary material for: Relation Extraction Based on Fusion Dependency Parsing from Chinese EMRs
Source: Hindawi journal article supplement (doi:10.1155/2020/8658040), 2020-06-08
Supplement: f1 [file 8658040.f1.zip › discharge/dischargeEntity/discharge10.xml.ent]

C=胸闷 P=65:67 T=symptom A=present
C=气急 P=68:70 T=symptom A=present
C=乙肝后肝硬化失代偿期 P=98:108 T=disease A=present
C=门静脉高压腹水 P=108:115 T=disease A=present
C=左前臂骨折 P=117:122 T=disease A=present
C=胆管结石伴胆囊炎 P=124:132 T=disease A=present
C=双肾囊肿 P=134:138 T=disease A=present
C=乙肝后肝硬化失代偿期 P=207:217 T=disease A=present
C=门静脉高压腹水 P=217:224 T=disease A=present
C=左前臂骨折 P=226:231 T=disease A=present
C=胆管结石伴胆囊炎 P=233:241 T=disease A=present
C=双肾囊肿 P=243:247 T=disease A=present
C=明显罗音 P=280:284 T=symptom A=absent
C=心率 P=285:287 T=test
C=病理性杂音 P=299:304 T=symptom A=absent
C=压痛 P=310:312 T=symptom A=absent
C=跳痛 P=314:316 T=symptom A=absent
C=叩击痛 P=340:343 T=symptom A=absent
C=移动性浊音 P=349:354 T=symptom A=absent
C=肠鸣音 P=356:359 T=test
C=胆胰疾病 P=454:458 T=disease A=possible
C=胃食管反流疾病 P=465:472 T=disease A=possible
C=消化道息肉 P=479:484 T=disease A=possible
C=脂肪肝 P=491:494 T=disease A=possible
C=慢性腹泻 P=501:505 T=disease A=possible
C=肝硬化 P=550:553 T=disease A=present
C=肝功能代偿期 P=553:559 T=disease A=present
C=肝功能失代偿期 P=600:607 T=disease A=present
C=并发症 P=609:612 T=disease A=present
C=肝功能显著减退 P=652:659 T=symptom A=possible
C=血氨偏高 P=660:664 T=symptom A=possible
C=肝性脑病 P=666:670 T=disease A=possible
C=腹水 P=686:688 T=disease A=present
C=无盐饮食 P=695:699 T=treatment A=present
C=低钠血症 P=724:728 T=disease A=possible
C=食道静脉曲张 P=740:746 T=disease A=present
C=出血 P=757:759 T=symptom A=possible
C=禁食 P=762:764 T=treatment A=present
C=严禁饮酒 P=765:769 T=treatment A=present
C=利尿药 P=808:811 T=treatment A=present
C=心悸 P=822:824 T=symptom A=possible
C=无力 P=825:827 T=symptom A=possible
C=保肝 P=837:839 T=treatment A=present
C=肝功能 P=862:865 T=test
C=甲胎蛋白 P=866:870 T=test
C=肾功能 P=871:874 T=test
C=电解质 P=875:878 T=test
C=CEA P=879:882 T=test
C=上腹部超声波 P=883:889 T=test
C=呕血 P=899:901 T=symptom A=possible
C=黑便 P=902:904 T=symptom A=possible
C=头昏 P=905:907 T=symptom A=possible
C=心悸 P=908:910 T=symptom A=possible
C=出汗 P=911:913 T=symptom A=possible
C=口渴 P=914:916 T=symptom A=possible
C=晕厥 P=920:922 T=symptom A=possible
C=行为异常 P=942:946 T=symptom A=possible
C=意识障碍 P=947:951 T=symptom A=possible
C=双手扑动样震颤 P=952:959 T=symptom A=possible
C=肝性脑病 P=968:972 T=disease A=possible
