# Supplementary material for: Relation Extraction Based on Fusion Dependency Parsing from Chinese EMRs
Source: Hindawi journal article supplement (doi:10.1155/2020/8658040), 2020-06-08
Supplement: f1 [file 8658040.f1.zip › discharge/dischargeEntity/discharge11.xml.ent]

C=多关节肿痛 P=61:66 T=symptom A=present
C=畸形 P=95:97 T=symptom A=absent
C=下肢静脉曲张 P=98:104 T=symptom A=absent
C=杵状指 P=105:108 T=symptom A=absent
C=肿胀 P=143:145 T=symptom A=present
C=轻压痛 P=146:149 T=symptom A=present
C=皮温偏高 P=150:154 T=symptom A=present
C=关节痛 P=189:192 T=disease A=possible
C=脊柱关节病 P=195:200 T=disease A=present
C=反应性关节炎 P=201:207 T=disease A=present
C=肝功能异常 P=210:215 T=disease A=present
C=T-SPOT P=242:248 T=test
C=结核 P=250:252 T=disease A=absent
C=未分化脊柱关节病 P=262:270 T=disease A=possible
C=抗炎 P=272:274 T=treatment A=present
C=抑制免疫 P=274:278 T=treatment A=present
C=氯诺昔康 P=279:283 T=treatment A=present
C=甲泼尼龙 P=290:294 T=treatment A=present
C=柳氮磺吡啶 P=300:305 T=treatment A=present
C=羟氯喹 P=313:316 T=treatment A=present
C=改善骨代谢 P=324:329 T=treatment A=present
C=鹿胍多肽 P=330:334 T=treatment A=present
C=活血 P=336:338 T=treatment A=present
C=疏血通 P=339:342 T=treatment A=present
C=护肝 P=344:346 T=treatment A=present
C=异甘草酸镁 P=347:352 T=treatment A=present
C=抗氧化 P=354:357 T=treatment A=present
C=硫辛酸 P=358:361 T=treatment A=present
C=未分化脊柱关节病 P=395:403 T=disease A=present
C=肝功能异常 P=405:410 T=disease A=present
C=关节肿痛 P=426:430 T=symptom A=present
C=右侧腰臀部疼痛 P=435:442 T=symptom A=present
C=血常规 P=648:651 T=test
C=肝肾功能 P=652:656 T=test
C=CRP P=657:660 T=test
C=血沉 P=661:663 T=test
C=免疫球蛋白 P=664:669 T=test
C=激素 P=688:690 T=disease A=present
C=免疫抑制剂 P=693:698 T=disease A=present
C=血常规 P=778:781 T=test
C=肝肾功能 P=782:786 T=test
C=泼尼松 P=847:850 T=treatment A=present
C=羟氯喹 P=879:882 T=treatment A=present
C=柳氮磺吡啶 P=909:914 T=treatment A=present
C=复方杜仲健骨颗粒 P=941:949 T=treatment A=present
C=洛索洛芬 P=965:969 T=treatment A=present
