# Supplementary material for: Relation Extraction Based on Fusion Dependency Parsing from Chinese EMRs
Source: Hindawi journal article supplement (doi:10.1155/2020/8658040), 2020-06-08
Supplement: f1 [file 8658040.f1.zip › discharge/dischargeEntity/discharge12.xml.ent]

C=双下肢水肿 P=64:69 T=symptom A=present
C=下肢无力 P=70:74 T=symptom A=present
C=T P=82:83 T=test
C=P P=90:91 T=test
C=R P=98:99 T=test
C=BP P=106:108 T=test
C=肿大 P=144:146 T=symptom A=absent
C=湿性罗音 P=162:166 T=symptom A=absent
C=心率 P=168:170 T=test
C=病理性杂音 P=188:193 T=symptom A=absent
C=压痛 P=204:206 T=symptom A=absent
C=反跳痛 P=207:210 T=symptom A=absent
C=双下肢浮肿 P=219:224 T=symptom A=present
C=库欣综合征 P=243:248 T=disease A=present
C=2型糖尿病 P=250:255 T=disease A=present
C=肺部感染 P=257:261 T=disease A=present
C=泌尿道感染 P=263:268 T=disease A=present
C=高血压病 P=270:274 T=disease A=present
C=控制血糖 P=302:306 T=treatment A=present
C=胰岛素 P=307:310 T=treatment A=present
C=比格列酮二甲双胍 P=311:319 T=treatment A=present
C=抗感染 P=321:324 T=treatment A=present
C=头孢他啶 P=325:329 T=treatment A=present
C=抗氧化 P=331:334 T=treatment A=present
C=硫辛酸 P=335:338 T=treatment A=present
C=降压 P=340:342 T=treatment A=present
C=维拉帕米缓释片 P=343:350 T=treatment A=present
C=改善骨质疏松 P=352:358 T=treatment A=present
C=维生素D碳酸钙 P=359:366 T=treatment A=present
C=阿法骨化醇胶囊 P=367:374 T=treatment A=present
C=对症支持 P=376:380 T=treatment A=present
C=库欣综合征双侧肾上腺腺瘤 P=418:430 T=disease A=present
C=2型糖尿病 P=432:437 T=disease A=present
C=肺部感染 P=439:443 T=disease A=present
C=泌尿道感染 P=445:450 T=disease A=present
C=高血压病 P=452:456 T=disease A=present
C=骨质疏松 P=458:462 T=disease A=present
C=甲状腺结节 P=464:469 T=disease A=present
C=垂体微腺瘤 P=471:476 T=disease A=possible
C=肿大 P=532:534 T=symptom A=absent
C=压痛 P=536:538 T=symptom A=absent
C=震颤 P=539:541 T=symptom A=absent
C=血管杂音 P=542:546 T=symptom A=absent
C=湿性罗音 P=563:567 T=symptom A=absent
C=心率 P=569:571 T=test
C=病理性杂音 P=589:594 T=symptom A=absent
C=压痛 P=600:602 T=symptom A=absent
C=反跳痛 P=603:606 T=symptom A=absent
C=双下肢轻度浮肿 P=615:622 T=symptom A=present
C=肝肾功能 P=715:719 T=test
C=电解质 P=719:722 T=test
C=血脂 P=723:725 T=test
C=血糖 P=726:728 T=test
C=HbA1c P=729:734 T=test
C=尿蛋白 P=735:738 T=test
C=甲状腺功能 P=739:744 T=test
C=血管 P=745:747 T=test
C=B超 P=747:749 T=test
C=眼底检查 P=750:754 T=test
C=心电图 P=755:758 T=test
C=低盐低脂 P=774:778 T=treatment A=present
C=戒烟戒酒 P=789:793 T=treatment A=present
C=避免吸入二手烟 P=794:801 T=treatment A=present
C=血压 P=806:808 T=test
C=血糖 P=808:810 T=test
C=低血糖 P=813:816 T=disease A=possible
C=糖尿病 P=823:826 T=disease A=possible
C=比格列酮二甲双胍片 P=851:860 T=treatment A=present
C=人胰岛素R笔芯 P=880:887 T=treatment A=present
C=甘精胰岛素注射液 P=920:928 T=treatment A=present
C=维拉帕米缓释片 P=947:954 T=treatment A=present
C=骨化三醇软胶囊 P=980:987 T=treatment A=present
C=格列齐特缓释片 P=1017:1024 T=treatment A=present
