# Supplementary material for: Relation Extraction Based on Fusion Dependency Parsing from Chinese EMRs
Source: Hindawi journal article supplement (doi:10.1155/2020/8658040), 2020-06-08
Supplement: f1 [file 8658040.f1.zip › discharge/dischargeEntity/discharge13.xml.ent]

C=头痛 P=72:74 T=symptom A=present
C=呕吐 P=75:77 T=symptom A=present
C=意识障碍 P=78:82 T=symptom A=present
C=神志嗜睡 P=94:98 T=symptom A=present
C=高血压 P=185:188 T=disease A=present
C=糖尿病 P=189:192 T=disease A=present
C=肾功能不全 P=193:198 T=disease A=present
C=肺部感染 P=199:203 T=disease A=present
C=右侧小脑梗塞病史 P=204:212 T=disease A=present
C=头颅CT P=214:218 T=test
C=左侧丘脑出血并破入脑室 P=219:230 T=disease A=present
C=右侧小脑梗塞 P=231:237 T=disease A=present
C=左侧丘脑出血并破入脑室 P=256:267 T=disease A=present
C=高血压病 P=270:274 T=disease A=present
C=糖尿病 P=277:280 T=disease A=present
C=肾功能不全 P=283:288 T=disease A=present
C=肺部感染 P=291:295 T=disease A=present
C=右侧小脑梗塞后 P=298:305 T=disease A=present
C=改善脑代谢 P=334:339 T=treatment A=present
C=化痰 P=340:342 T=treatment A=present
C=控制血糖 P=343:347 T=treatment A=present
C=消化道出血 P=356:361 T=symptom A=possible
C=止血 P=364:366 T=treatment A=present
C=抑酸 P=367:369 T=treatment A=present
C=补液 P=370:372 T=treatment A=present
C=左侧丘脑出血并破入脑室 P=399:410 T=disease A=present
C=高血压病 P=413:417 T=disease A=present
C=糖尿病 P=420:423 T=disease A=present
C=肾功能不全 P=426:431 T=disease A=present
C=肺部感染 P=434:438 T=disease A=present
C=右侧小脑梗塞 P=441:447 T=disease A=present
C=上消化道出血 P=452:458 T=disease A=present
C=多器官功能衰竭 P=483:490 T=symptom A=present
C=血压下降 P=491:495 T=symptom A=present
C=叹息样呼吸 P=496:501 T=symptom A=present
C=死亡 P=558:560 T=disease A=possible
C=血压 P=638:640 T=test
C=血糖 P=654:656 T=test
C=低血糖 P=659:662 T=disease A=possible
C=戒烟酒 P=670:673 T=treatment A=present
C=高血压 P=683:686 T=disease A=present
C=褥疮 P=748:750 T=disease A=possible
C=坠积性肺炎 P=755:760 T=disease A=possible
C=深静脉血栓 P=763:768 T=disease A=possible
