# Supplementary material for: Relation Extraction Based on Fusion Dependency Parsing from Chinese EMRs
Source: Hindawi journal article supplement (doi:10.1155/2020/8658040), 2020-06-08
Supplement: f1 [file 8658040.f1.zip › discharge/dischargeEntity/discharge14.xml.ent]

C=血压升高 P=65:69 T=symptom A=present
C=T P=79:80 T=test
C=P P=87:88 T=test
C=R P=95:96 T=test
C=BP P=103:105 T=test
C=肿大 P=144:146 T=symptom A=absent
C=发绀 P=150:152 T=symptom A=absent
C=怒张 P=157:159 T=symptom A=absent
C=肿大 P=174:176 T=symptom A=absent
C=湿性罗音 P=191:195 T=symptom A=absent
C=心率 P=202:204 T=test
C=P2 P=213:215 T=test
C=病理性杂音 P=227:232 T=symptom A=absent
C=心包摩擦音 P=234:239 T=symptom A=absent
C=压痛 P=256:258 T=symptom A=absent
C=反跳痛 P=259:262 T=symptom A=absent
C=水肿 P=267:269 T=symptom A=absent
C=高血压病 P=300:304 T=disease A=present
C=奥美沙坦 P=338:342 T=treatment A=present
C=硝苯地平 P=343:347 T=treatment A=present
C=乌拉地尔 P=348:352 T=treatment A=present
C=抗血小板 P=355:359 T=treatment A=present
C=肾功肌酐高 P=368:373 T=symptom A=present
C=蛋白尿 P=374:377 T=symptom A=present
C=血压波动较大 P=379:385 T=symptom A=present
C=血压 P=386:388 T=test
C=氯沙坦钾 P=412:416 T=treatment A=present
C=氢氯噻嗪 P=424:428 T=treatment A=present
C=硝苯地平控释片 P=435:442 T=treatment A=present
C=比索洛尔 P=450:454 T=treatment A=present
