# Supplementary material for: Relation Extraction Based on Fusion Dependency Parsing from Chinese EMRs
Source: Hindawi journal article supplement (doi:10.1155/2020/8658040), 2020-06-08
Supplement: f1 [file 8658040.f1.zip › discharge/dischargeEntity/discharge15.xml.ent]

C=上腹部隐痛 P=65:70 T=symptom A=present
C=T P=80:81 T=test
C=P P=88:89 T=test
C=R P=96:97 T=test
C=BP P=104:106 T=test
C=湿性罗音 P=134:138 T=symptom A=absent
C=病理性杂音 P=146:151 T=symptom A=absent
C=心包摩擦音 P=153:158 T=symptom A=absent
C=腹壁静脉曲张 P=175:181 T=symptom A=absent
C=压痛 P=188:190 T=symptom A=absent
C=跳痛 P=192:194 T=symptom A=absent
C=包块 P=198:200 T=symptom A=absent
C=叩击痛 P=233:236 T=symptom A=absent
C=移动性浊音 P=242:247 T=symptom A=absent
C=水肿 P=262:264 T=symptom A=absent
C=十二指肠球部溃疡 P=283:291 T=disease A=present
C=慢性浅表 P=293:297 T=disease A=present
C=萎缩性胃窦炎 P=298:304 T=disease A=present
C=糜烂 P=305:307 T=disease A=present
C=十二指肠球部溃疡 P=376:384 T=disease A=present
C=慢性浅表 P=386:390 T=disease A=present
C=萎缩性胃窦炎 P=391:397 T=disease A=present
C=糜烂 P=398:400 T=disease A=present
C=明显罗音 P=433:437 T=symptom A=absent
C=心率 P=438:440 T=symptom A=absent
C=病理性杂音 P=452:457 T=symptom A=absent
C=压痛 P=463:465 T=symptom A=absent
C=反跳痛 P=466:469 T=symptom A=absent
C=叩击痛 P=493:496 T=symptom A=absent
C=移动性浊音 P=502:507 T=symptom A=absent
C=胆胰疾病 P=625:629 T=disease A=present
C=胃食管反流疾病 P=636:643 T=disease A=present
C=消化道息肉 P=650:655 T=disease A=present
C=脂肪肝 P=662:665 T=disease A=present
C=慢性腹泻 P=672:676 T=disease A=present
C=戒烟戒酒 P=725:729 T=treatment A=present
C=忌辛辣 P=767:770 T=treatment A=present
C=幽门螺旋杆菌 P=804:810 T=disease A=possible
C=呼气试验 P=826:830 T=test
C=胃溃疡 P=839:842 T=disease A=present
C=胃镜 P=851:853 T=test
C=辛可芬 P=866:869 T=treatment A=absent
C=保泰松 P=870:873 T=treatment A=absent
C=利舍平 P=874:877 T=treatment A=absent
C=吲哚美辛 P=878:882 T=treatment A=absent
C=阿司匹林 P=883:887 T=treatment A=absent
C=氯吡格雷 P=888:892 T=treatment A=absent
C=上腹疼痛 P=961:965 T=symptom A=present
C=呕血 P=979:981 T=symptom A=possible
C=黑便 P=982:984 T=symptom A=possible
C=胃镜 P=994:996 T=test
