# Supplementary material for: Relation Extraction Based on Fusion Dependency Parsing from Chinese EMRs
Source: Hindawi journal article supplement (doi:10.1155/2020/8658040), 2020-06-08
Supplement: f1 [file 8658040.f1.zip › discharge/dischargeRelation/discharge1.xml.rel]

E={头孢呋辛【334-338】treatment;抗感染【338-341】treatment;阿糖腺苷【342-346】treatment;抗病毒【346-349】treatment;布地奈德【350-354】treatment;雾化【354-356】treatment;补液【357-359】treatment;对症治疗【360-364】treatment;}||R=TrIS||E={咳嗽【373-375】symptom;皮疹【380-382】symptom;}
