# Supplementary material for: Relation Extraction Based on Fusion Dependency Parsing from Chinese EMRs
Source: Hindawi journal article supplement (doi:10.1155/2020/8658040), 2020-06-08
Supplement: f1 [file 8658040.f1.zip › discharge/dischargeRelation/discharge3.xml.rel]

E={胸部CT【249-253】test;}||R=TeRS||E={两肺局限性肺气肿【287-295】symptom;}
E={胸部CT【249-253】test;}||R=TeRD||E={右肺上叶炎性病变【254-262】disease;炎症【284-286】disease;}
