# Supplementary material for: Relation Extraction Based on Fusion Dependency Parsing from Chinese EMRs
Source: Hindawi journal article supplement (doi:10.1155/2020/8658040), 2020-06-08
Supplement: f1 [file 8658040.f1.zip › discharge/dischargeRelation/discharge5.xml.rel]

E={营养支持【899-903】treatment;}||R=TrAD||E={褥疮【911-913】disease;肺炎【914-916】disease;}
