# Supplementary material for: Relation Extraction Based on Fusion Dependency Parsing from Chinese EMRs
Source: Hindawi journal article supplement (doi:10.1155/2020/8658040), 2020-06-08
Supplement: f1 [file 8658040.f1.zip › discharge/dischargeRelation/discharge6.xml.rel]

E={少吃刺激性食物【1150-1157】treatment;忌烟酒【1158-1161】treatment;}||R=TrAD||E={前列腺疾病【1114-1119】disease;尿路感染【1143-1147】disease;}
