# Supplementary material for: Relation Extraction Based on Fusion Dependency Parsing from Chinese EMRs
Source: Hindawi journal article supplement (doi:10.1155/2020/8658040), 2020-06-08
Supplement: f1 [file 8658040.f1.zip › discharge/dischargeRelation/discharge7.xml.rel]

E={心率【153-155】test;}||R=TeAS||E={发绀【101-103】symptom;怒张【108-110】symptom;肿大【125-127】symptom;湿性罗音【142-146】symptom;病理性杂音【167-172】symptom;压痛【179-181】symptom;跳痛【183-185】symptom;水肿【190-192】symptom;}
E={低盐饮食【704-708】treatment;降压药物【731-735】treatment;}||R=TrAD||E={高血压【700-703】disease;}
E={血压【763-765】test;血压【791-793】test;}||R=TeCD||E={高血压【700-703】disease;}
E={低脂饮食【810-814】treatment;}||R=TrAD||E={冠心病【806-809】disease;}
E={抗心律失常药物【928-935】treatment;}||R=TrAD||E={心律失常【903-907】disease;}
E={心电图【940-943】test;Holter【944-950】test;}||R=TeCD||E={心律失常【903-907】disease;}
E={胺碘酮【976-979】treatment;}||R=TrAD||E={心律失常【903-907】disease;}
E={华法林【1005-1008】treatment;华法林【1037-1040】treatment;}||R=TrAD||E={房颤【998-1000】disease;}
E={血凝常规【1020-1024】test;}||R=TeCD||E={房颤【998-1000】disease;}
E={血压【1073-1075】test;}||R=TeCD||E={心力衰竭【1057-1061】disease;心衰【1087-1089】disease;}
E={心超【1285-1287】test;}||R=TeCD||E={肥厚梗阻性心肌病【1226-1234】disease;}
E={硝酸异山梨酯片【1375-1382】treatment;硝酸甘油【1383-1387】treatment;}||R=TrAS||E={胸闷痛【1391-1394】symptom;}
