# Supplementary material for: Relation Extraction Based on Fusion Dependency Parsing from Chinese EMRs
Source: Hindawi journal article supplement (doi:10.1155/2020/8658040), 2020-06-08
Supplement: f1 [file 8658040.f1.zip › discharge/dischargeRelation/discharge8.xml.rel]

E={眼底【167-169】test;}||R=TeRS||E={右眼黄斑萎缩【170-176】symptom;出血【177-179】symptom;}
E={妥布霉素地塞米松眼液【379-389】treatment;托吡卡胺眼液【390-396】treatment;}||R=TrAS||E={眼内反应【404-408】symptom;}
E={眼科检查【504-508】test;}||R=TeRS||E={左眼结膜反应性充血【522-531】symptom;}
