# Supplementary material for: Relation Extraction Based on Fusion Dependency Parsing from Chinese EMRs
Source: Hindawi journal article supplement (doi:10.1155/2020/8658040), 2020-06-08
Supplement: f1 [file 8658040.f1.zip › discharge/dischargeRelation/discharge9.xml.rel]

E={甲状腺手术【60-65】treatment;}||R=TrCS||E={抽搐【72-74】symptom;}
E={T【81-82】test;P【89-90】test;R【97-98】test;BP【105-107】test;}||R=TeAS||E={抽搐【72-74】symptom;}
