# Supplementary material for: Relation Extraction Based on Fusion Dependency Parsing from Chinese EMRs
Source: Hindawi journal article supplement (doi:10.1155/2020/8658040), 2020-06-08
Supplement: f1 [file 8658040.f1.zip › discharge/dischargeRelation/discharge10.xml.rel]

E={无盐饮食【695-699】treatment;}||R=TrAD||E={腹水【686-688】disease;}
E={禁食【762-764】treatment;}||R=TrAS||E={出血【757-759】symptom;}
E={肝性脑病【968-972】disease;}||R=SID||E={行为异常【942-946】symptom;意识障碍【947-951】symptom;双手扑动样震颤【952-959】symptom;}
