# Supplementary material for: Relation Extraction Based on Fusion Dependency Parsing from Chinese EMRs
Source: Hindawi journal article supplement (doi:10.1155/2020/8658040), 2020-06-08
Supplement: f1 [file 8658040.f1.zip › discharge/dischargeRelation/discharge11.xml.rel]

E={T-SPOT【242-248】test;}||R=TeRD||E={未分化脊柱关节病【262-270】disease;}
E={抗炎【272-274】treatment;氯诺昔康【279-283】treatment;甲泼尼龙【290-294】treatment;柳氮磺吡啶【300-305】treatment;羟氯喹【313-316】treatment;改善骨代谢【324-329】treatment;鹿胍多肽【330-334】treatment;活血【336-338】treatment;疏血通【339-342】treatment;护肝【344-346】treatment;异甘草酸镁【347-352】treatment;抗氧化【354-357】treatment;硫辛酸【358-361】treatment;}||R=TrID||E={未分化脊柱关节病【262-270】disease;}
