# Supplementary material for: Relation Extraction Based on Fusion Dependency Parsing from Chinese EMRs
Source: Hindawi journal article supplement (doi:10.1155/2020/8658040), 2020-06-08
Supplement: f1 [file 8658040.f1.zip › discharge/dischargeRelation/discharge12.xml.rel]

E={低盐低脂【774-778】treatment;戒烟戒酒【789-793】treatment;避免吸入二手烟【794-801】treatment;}||R=TrNAD||E={糖尿病【823-826】disease;}
E={血压【806-808】test;血糖【808-810】test;}||R=TeCD||E={低血糖【813-816】disease;}
