# Supplementary material for: Relation Extraction Based on Fusion Dependency Parsing from Chinese EMRs
Source: Hindawi journal article supplement (doi:10.1155/2020/8658040), 2020-06-08
Supplement: f1 [file 8658040.f1.zip › discharge/dischargeRelation/discharge13.xml.rel]

E={头颅CT【214-218】test;}||R=TeRD||E={左侧丘脑出血并破入脑室【219-230】disease;右侧小脑梗塞【231-237】disease;}
E={止血【364-366】treatment;抑酸【367-369】treatment;补液【370-372】treatment;}||R=TrAS||E={消化道出血【356-361】symptom;}
E={血糖【654-656】test;}||R=TeCD||E={低血糖【659-662】disease;}
E={戒烟酒【670-673】treatment;}||R=TrAD||E={高血压【683-686】disease;}
