# Supplementary material for: Relation Extraction Based on Fusion Dependency Parsing from Chinese EMRs
Source: Hindawi journal article supplement (doi:10.1155/2020/8658040), 2020-06-08
Supplement: f1 [file 8658040.f1.zip › discharge/dischargeRelation/discharge14.xml.rel]

E={氯沙坦钾【412-416】treatment;氢氯噻嗪【424-428】treatment;硝苯地平控释片【435-442】treatment;比索洛尔【450-454】treatment;}||R=TrIS||E={肾功肌酐高【368-373】symptom;蛋白尿【374-377】symptom;血压波动较大【379-385】symptom;}
