# Supplementary material for: Relation Extraction Based on Fusion Dependency Parsing from Chinese EMRs
Source: Hindawi journal article supplement (doi:10.1155/2020/8658040), 2020-06-08
Supplement: f1 [file 8658040.f1.zip › discharge/dischargeRelation/discharge15.xml.rel]

E={呼气试验【826-830】test;}||R=TeCD||E={幽门螺旋杆菌【804-810】disease;}
E={胃镜【851-853】test;}||R=TeCD||E={胃溃疡【839-842】disease;}
E={胃镜【994-996】test;}||R=TeAS||E={上腹疼痛【961-965】symptom;呕血【979-981】symptom;黑便【982-984】symptom;}
