# Supplementary material for: Relation Extraction Based on Fusion Dependency Parsing from Chinese EMRs
Source: Hindawi journal article supplement (doi:10.1155/2020/8658040), 2020-06-08
Supplement: f1 [file 8658040.f1.zip › discharge/text/discharge71.xml]

<?xml version= "1.0" encoding="UTF-8"?>
<discharge>
<入院情况>
肛门有物脱出伴大便出血1个月。
刻下：患者诉肛门有物脱出，大便时出血量大，肛门肿痛，纳平，寐安，小便正常，大便昨日1次，质软通畅。
</入院情况>
<入院诊断>
中医诊断：1.混合痔，湿热下注证
西医诊断：1.混合痔
</入院诊断>
<诊疗经过>
入院后完善相关检查，予以混合痔外剥内扎术、术后静点头孢硫脒消炎、氨甲环酸止血及换药、包扎等治疗，患者病情稳定，予出院，门诊随访
</诊疗经过>
<出院诊断>
中医诊断：1.混合痔2.混合痔3.混合痔，湿热下注证
西医诊断：
</出院诊断>
<出院情况>
患者诉疼痛可，纳可，两便调，查体见伤口略有渗血，无渗液，包扎良好，经上级医生批准予以出院。
</出院情况>
<出院医嘱>
1、中医科门诊随访。
郭颂铭主任肛肠科门诊随访。
2、健康指导：避风寒，慎起居，节饮食，畅情志。
3、出院带药：药物已备。
</出院医嘱>
</discharge>
