# Supplementary material for: Relation Extraction Based on Fusion Dependency Parsing from Chinese EMRs
Source: Hindawi journal article supplement (doi:10.1155/2020/8658040), 2020-06-08
Supplement: f1 [file 8658040.f1.zip › discharge/text/discharge72.xml]

<?xml version= "1.0" encoding="UTF-8"?>
<discharge>
<入院情况>
青年女性患者，腰痛3天入院。
查体：一般状况可，心肺肝脾未见异常，[专科情况]:脊柱生理曲度消失，未及明显侧凸。
腰椎活动受限，胸腰段椎体棘突压痛。
腰椎双侧椎旁肌紧张。
感觉：四肢浅感觉、深感觉无殊。
肌力检查：双侧斜方肌、肩胛提肌肌力V级。
双侧肱三头肌、肱二头肌肌力、伸腕肌、屈腕肌肌力V级，双手握力V级。
左侧髂腰肌、股四头肌肌力、胫前肌、足拇指背伸肌、跖屈肌肌力V级；右侧髂腰肌、股四头肌、胫前肌、足拇指背伸肌、跖屈肌肌力V－级。
双侧膝反射、踝反射正常。
双侧直腿抬高试验、直腿抬高加强试验（－）。
</入院情况>
<入院诊断>
1.腰2-3椎间盘突出
</入院诊断>
<诊疗经过>
入院后完善相关检查，予以洛索洛芬消炎止痛治疗，加味天麻胶囊、微粉化地奥司明片活血镇痛治疗，甲钴胺营养神经治疗以及微波治疗、运动治疗(腰背肌训练)、关节松动治疗（腰椎）、脊柱小关节紊乱推拿治疗（腰椎）、腰椎间盘突出推拿治疗（腰背肌）等康复治疗。
患者病情稳定，予出院，门诊随访。
</诊疗经过>
<出院诊断>
1.腰2-3椎间盘突出2.乙型肝炎
</出院诊断>
<出院情况>
患者现右下肢肌力较前好转。
查体：一般状况可，心肺肝脾未见异常，[专科情况]:脊柱生理曲度消失，未及明显侧凸。
腰椎活动受限，胸腰段椎体棘突压痛。
腰椎双侧椎旁肌紧张。
感觉：四肢浅感觉、深感觉无殊。
肌力检查：双侧斜方肌、肩胛提肌肌力V级。
双侧肱三头肌、肱二头肌肌力、伸腕肌、屈腕肌肌力V级，双手握力V级。
双侧髂腰肌、股四头肌肌力V级，双侧胫前肌、足拇指背伸肌、跖屈肌肌力V级。
双侧膝反射、踝反射正常。
双侧直腿抬高试验、直腿抬高加强试验（－）。
</出院情况>
<出院医嘱>
1、门诊随访：周二、周四下午金荣祥副主任医师专家门诊随诊。
2、健康宣教：禁止弯腰抬重物。
3、康复指导：继续腰背肌锻炼。
4、出院带药：
垂盆草颗粒5gbid泡水冲服；
腺苷钴胺片0.75mgtidpo。
</出院医嘱>
</discharge>
