# Supplementary material for: Relation Extraction Based on Fusion Dependency Parsing from Chinese EMRs
Source: Hindawi journal article supplement (doi:10.1155/2020/8658040), 2020-06-08
Supplement: f1 [file 8658040.f1.zip › discharge/text/discharge73.xml]

<?xml version= "1.0" encoding="UTF-8"?>
<discharge>
<入院情况>
患者系因“[主诉内容]”入院，查体示：神清，气平，
</入院情况>
<入院诊断>
双下肢大隐静脉曲张
</入院诊断>
<诊疗经过>
入院后完善相关检查，明确诊断后，于格式化，现患者病情稳定，予出院，门诊随访
</诊疗经过>
<出院诊断>
</出院诊断>
<出院情况>
神清，气平，心肺听诊无殊，腹部无压痛。
</出院情况>
<出院医嘱>
1、门急诊随访，不适即刻复诊，忌食油腻食物。
门诊随访时间（包括周几专家门诊，周几专科门诊）
2、健康宣教：
3、康复指导：
4、门诊随访肝功能及B超
5：带药：
</出院医嘱>
</discharge>
