# Supplementary material for: Relation Extraction Based on Fusion Dependency Parsing from Chinese EMRs
Source: Hindawi journal article supplement (doi:10.1155/2020/8658040), 2020-06-08
Supplement: f1 [file 8658040.f1.zip › discharge/text/discharge74.xml]

<?xml version= "1.0" encoding="UTF-8"?>
<discharge>
<入院情况>
患者因“体检发现直肠肿物1月”拟“直肠息肉”收治入院。
入院时患者诉大便次数较多，2-4次/天，便溏，便前腹痛、便后缓解，无肛门肿痛、便血等，发病以来体重无明显减轻。
体格检查：T：36.8℃，P：76次/分，R：18次/分，BP：120/80mmHg。
神志清楚，面色少华，步入病房，查体合作，对答切题。
全身皮肤及巩膜无黄染。
眼睑无浮肿。
心、肺（-）。
腹平软，无压痛、反跳痛，肝脾未及。
双下肢无浮肿。
专科检查：肛门直肠截石位6点肛指可触及带蒂硬结、无压痛，指套未染血。
</入院情况>
<入院诊断>
中医诊断：直肠息肉（湿热下注）
西医诊断：直肠息肉
</入院诊断>
<诊疗经过>
患者入院后予行必要辅检，排除手术禁忌，于1.7上午局麻下行直肠息肉摘除术，手术顺利，术后予常规抗炎、止血、止痛、换药、调节肠道菌群等处理；另外予香连片清热燥湿；予控制血糖。
</诊疗经过>
<出院诊断>
中医诊断：直肠息肉（湿热下注）
西医诊断：直肠息肉
</出院诊断>
<出院情况>
患者无特殊不适主诉。
手术伤口无红肿、无水肿、无渗出，肛周皮温正常。
</出院情况>
<出院医嘱>
1、中医科肛肠门诊随访。
郭颂铭主任门诊时间每周一~五
2、健康指导：忌食辛辣温燥之品，注意保持大便软畅、肛周清洁。
</出院医嘱>
</discharge>
