# Supplementary material for: Relation Extraction Based on Fusion Dependency Parsing from Chinese EMRs
Source: Hindawi journal article supplement (doi:10.1155/2020/8658040), 2020-06-08
Supplement: f1 [file 8658040.f1.zip › discharge/text/discharge75.xml]

<?xml version= "1.0" encoding="UTF-8"?>
<discharge>
<入院情况>
患者因“发现左手掌肿物一月余”入院，查体：左手虎口下可触及一大小1*1cm质地较硬肿物，与周围组织界限可，活动度可，无明显压痛，手指活动均正常，皮肤感觉与血运情况可，余无殊。
</入院情况>
<入院诊断>
1.左手肿物
</入院诊断>
<诊疗经过>
患者入院后完善相关检查，明确诊断，完善好术前准备后于2015-04-22在臂丛麻醉下行左手肿物切除术，术顺，现患者病情稳定，予出院，门诊随访。
</诊疗经过>
<出院诊断>
1.左手肿物
</出院诊断>
<出院情况>
患者一般情况可，神志清，精神可，无咳嗽咳痰，无腹痛腹胀，大小便无异常，手术伤口愈合可，较干燥，未见明显渗出，周围皮肤情况可，手指活动可。
</出院情况>
<出院医嘱>
1、门诊随访：1月内每周二下午李山珠主任医师专家门诊，预约电话66111442。
2、健康宣教：保持手术伤口清洁干燥，虎口处呈张力位，每2日门诊换药，术后2周拆线。
3、康复指导：1周后咨询病理结果。
</出院医嘱>
</discharge>
