# Supplementary material for: Relation Extraction Based on Fusion Dependency Parsing from Chinese EMRs
Source: Hindawi journal article supplement (doi:10.1155/2020/8658040), 2020-06-08
Supplement: f1 [file 8658040.f1.zip › discharge/text/discharge76.xml]

<?xml version= "1.0" encoding="UTF-8"?>
<discharge>
<入院情况>
患者因“摔伤后左髋部疼痛、活动受限3天”入院。
查体：双肺呼吸音粗，未闻及明显干湿罗音，心率94次/分，律齐，左下肢见明显外旋、短缩畸形，左髋部无明显肿胀，未见淤血，局部压痛与叩痛阳性，轴向叩击痛阳性，左腹股沟中点处压痛阳性，主动或被动活动时左髋部疼痛加剧，左足感觉、活动与血运正常。
</入院情况>
<入院诊断>
1.左股骨颈骨折2.冠心病3.高血压病4.脑梗塞后
</入院诊断>
<诊疗经过>
入院后完善相关检查，积极术前准备，排除绝对手术禁忌，于2015-01-29在全麻下行“左侧半髋关节置换术”，手术顺利，术后予预防感染、抗凝、对症补液治疗，术中术后共输红悬液6U，冰冻血浆600ml，无明显输血反应。
目前患者病情稳定，伤口愈合好，予出院，门诊随诊。
</诊疗经过>
<出院诊断>
1.左股骨颈骨折2.冠心病，左房增大，频发房早3.高血压病4.脑梗塞后5.老年期痴呆
</出院诊断>
<出院情况>
患者一般情况可，无特殊不适主诉。
查体：神清，精神可，生命体征平稳，切口愈合可（I/甲），患肢末端活动可，末梢循环可。
</出院情况>
<出院医嘱>
1、门诊随访：周一至周五白天关节外科门诊（务必于术后6周、3月、6月、1年、2年门诊定期复诊）。
2、健康宣教：根据患者病情，个体化安排功能锻炼或下地负重行走。
关节置换患者：髋关节置换者术后6周患髋禁止过度屈曲，内收内旋，以防脱位。
所有关节置换手术，术后两年进行有创性操作（如牙科手术）、上呼吸道感染、足部感染等需使用抗生素保护，以免人工关节假体周围感染。
3、康复指导：加强患肢功能锻炼。
4、特殊交待内容：出院带药：喹硫平100mg每晚口服一次，心身科随访。
阿司匹林肠溶片100mg每天口服一次；氨氯地平10mg每天口服一次；托特罗定缓释片4mg每天口服一次（一周后停）；石山碱甲片一次0.05mg，每天三次口服
</出院医嘱>
</discharge>
