# Supplementary material for: Relation Extraction Based on Fusion Dependency Parsing from Chinese EMRs
Source: Hindawi journal article supplement (doi:10.1155/2020/8658040), 2020-06-08
Supplement: f1 [file 8658040.f1.zip › discharge/text/discharge77.xml]

<?xml version= "1.0" encoding="UTF-8"?>
<discharge>
<入院情况>
“血糖控制不佳16年，呕血2年，加重2周”体检：BP：150/80mmHg。
神志清楚，精神状态良好，贫血貌，全身皮肤粘膜无黄染，无肝掌、蜘蛛痣，全身浅表淋巴结无肿大。
颈软，左侧甲状腺III度肿大，质硬，无明显压痛、震颤、血管杂音。
双肺呼吸音清，未闻及干、湿性罗音。
心律稍不齐，各瓣膜听诊区未闻及病理性杂音，腹平软，无压痛、反跳痛，肝脾肋下未触及，双下肢无浮肿。
</入院情况>
<入院诊断>
1.2型糖尿病糖尿病酮症2.甲状腺乳头状癌III期侵犯食管3.冠状动脉粥样硬化性心脏病陈旧性心梗心功能III级（NYHA）
</入院诊断>
<诊疗经过>
入院后完善相关检查，予以禁食、止血、抑酸、补液、控制血糖等治疗，4.10行急诊胃镜见食管上段靠近食管入口可见新生物（拒活检），导致出血，予以普外科、消化科、肿瘤科会诊后，考虑：甲状腺乳头状癌III期，侵犯食管，患者为晚期肿瘤患者，手术风险高，建议可予碘131放射性同位素治疗，或口服左旋甲状腺素片至TSH在0.2-0.4mIU/l，必要时，可考虑行化疗或靶向治疗。
食管狭窄处可支架植入术。
告知患者及家属会诊意见，家属及患者经慎重考虑后决定暂缓检查，待出院后门诊随访治疗。
目前患者病情稳定，予出院，门诊随访
</诊疗经过>
<出院诊断>
1.2型糖尿病糖尿病酮症2.甲状腺乳头状癌III期侵犯食管3.冠状动脉粥样硬化性心脏病陈旧性心梗心功能III级（NYHA）4.胆囊炎胆囊结石5.慢性膀胱炎可能
</出院诊断>
<出院情况>
患者痰中带血较前稍好转，进食水哽咽感明显，无恶心呕吐。
查体：神清，精神状态良好，贫血貌，全身皮肤粘膜无黄染，无肝掌、蜘蛛痣，全身浅表淋巴结无肿大。
颈软，双侧甲状腺弥漫性肿大，质硬，无明显压痛、震颤、血管杂音。
双肺呼吸音清，未闻及干、湿性罗音。
心律稍不齐，各瓣膜听诊区未闻及病理性杂音，腹平软，无压痛、反跳痛，肝脾肋下未触及，双下肢无浮肿。
</出院情况>
<出院医嘱>
1、门诊随访：门诊随诊。
内分泌科、甲乳外科、心内科随访治疗。
2、健康宣教：
定期复查三大常规、肝肾功能电解质、血脂、血糖、HbA1c、尿蛋白、甲状腺功能、血管B超、眼底检查、心电图等。
如有不适及时就诊。
3、康复指导：糖尿病饮食，戒烟戒酒，避免吸入二手烟，自我监测血压血糖，避免低血糖发生。
4、出院带药：
凝血酶冻干粉Gsig2000u必要时泡水口服
比沙可啶Gsig5mg必要时口服
阿卡波糖Hsig50mg每日三次餐中口服
左旋甲状腺素片Hsig25ug每日一次口服
</出院医嘱>
</discharge>
