# Supplementary material for: Relation Extraction Based on Fusion Dependency Parsing from Chinese EMRs
Source: Hindawi journal article supplement (doi:10.1155/2020/8658040), 2020-06-08
Supplement: f1 [file 8658040.f1.zip › discharge/text/discharge78.xml]

<?xml version= "1.0" encoding="UTF-8"?>
<discharge>
<入院情况>
患者因“气喘伴神志不清1天”入院。
查体：神志清楚，精神状态良好，查体合作。
双肺呼吸音粗，双侧肺可闻及湿性罗音。
心浊音界未见异常，心率78次/分，律不齐，P2不亢，各瓣膜听诊区未闻及病理性杂音，无心包摩擦音，剑突下心音增强。
腹平坦，无腹壁静脉曲张，腹部柔软，无压痛、反跳痛，肝脏肋下未触及，脾脏肋下未触及，Murphy氏征阴性，肠鸣音未见异常，4次/分。
双下肢无浮肿。
四肢肌力、肌张力未见异常，双侧Babinski征阴性。
</入院情况>
<入院诊断>
1.肺部感染，II呼吸衰竭2.冠状动脉粥样硬化性心脏病，急性冠脉综合症，心功能IV级3.胰腺损伤4.慢性肾功能不全
</入院诊断>
<诊疗经过>
入院后完善相关检查，予以抗感染、止咳、祛痰、改善心肌、强心、利尿、营养支持等对症处理，患者症状好转，无明显不适主诉，予出院。
</诊疗经过>
<出院诊断>
1.肺部感染，II呼吸衰竭2.冠状动脉粥样硬化性心脏病，急性冠脉综合症，心功能IV级3.胰腺损伤4.肾功能不全
</出院诊断>
<出院情况>
神志清楚，精神可，昨日最高体温37.1℃，今晨体温36.8℃，脉搏76次/分，呼吸18次/分，血氧饱和度100%。
昨日入量1647.5ml，出量2000ml。
双肺呼吸音稍粗，未闻及明显干湿？音，心律不齐，未闻及明显杂音。
腹软，全腹无压痛及反跳痛，双下肢无水肿。
</出院情况>
<出院医嘱>
1、门诊随访：门诊随诊。
心内科门诊随访。
2、健康宣教：注意饮食。
3、康复指导：注意休息。
</出院医嘱>
</discharge>
