# Supplementary material for: Relation Extraction Based on Fusion Dependency Parsing from Chinese EMRs
Source: Hindawi journal article supplement (doi:10.1155/2020/8658040), 2020-06-08
Supplement: f1 [file 8658040.f1.zip › discharge/text/discharge79.xml]

<?xml version= "1.0" encoding="UTF-8"?>
<discharge>
<入院情况>
患者系因“左下肢肿胀3天余，加重1天”入院，查体：T：36.1℃，P：80次/分，R：18次/分，BP：144/90mmHg。
一般状况可，心肺肝脾未见异常。
专科情况：左下肢明显肿胀，左侧足背动脉搏动较弱，左侧腓肠肌无压痛，无紫绀样改变，皮肤无湿疹溃疡样变，足趾感觉尚可，活动自如，右下肢无异常。
</入院情况>
<入院诊断>
1.左侧下肢静脉血栓形成2.2型糖尿病
</入院诊断>
<诊疗经过>
入院后完善相关检查，，现患者病情稳定，予出院，门诊随访
</诊疗经过>
<出院诊断>
</出院诊断>
<出院情况>
患者无特殊不适主诉。
</出院情况>
<出院医嘱>
1.门诊随访，周二上午、周五下午门诊随诊。
2、健康宣教：甲状腺：拆线后练习颈部活动，防止疤痕收缩，甲状腺外科门诊随访。
3、康复指导：多选
4、出院带药：左旋甲状腺素片*1盒：1粒/次，1次/天。
</出院医嘱>
</discharge>
