# Supplementary material for: Relation Extraction Based on Fusion Dependency Parsing from Chinese EMRs
Source: Hindawi journal article supplement (doi:10.1155/2020/8658040), 2020-06-08
Supplement: f1 [file 8658040.f1.zip › discharge/text/discharge80.xml]

<?xml version= "1.0" encoding="UTF-8"?>
<discharge>
<入院情况>
因“阵发性心悸、恶心、濒死感加重半月，总病程近两年”第三次住院。
体格检查：T：36.5℃，P：78次/分，R：18次/分，BP：136/90mmHg。
神清，气平，甲状腺未见肿大，双肺呼吸音清，心律齐，各瓣膜听诊区未及杂音，腹平软，肝脾肋下未及，无压痛，反跳痛，四肢活动自如，神经系统未见明显异常。
精神检查：意识清晰，对时间、地点、人物定向全，自行平步入室；对周围环境无陌生感，接触交谈合作，对答切题，语速适中，语量，声音适中，情绪紧张，焦虑，担心心悸恶心发作，兴趣减退，精力下降。
眠差，主要为入眠困难，早醒。
未引出幻觉和妄想。
理解判断力正常，即刻记忆力、短期和远期记忆力略减退，智能粗测基本正常。
自知力存在。
</入院情况>
<入院诊断>
1.焦虑障碍（间歇性惊恐发作）；2.高血压病
</入院诊断>
<诊疗经过>
入院后完善相关检查，予以艾司西肽普兰片（最大剂量10mgqd）、艾司唑仑片改善情绪及睡眠，并辅以放松、脑功能、生物反馈综合治疗，患者病情稳定，予正式出院，门诊随访。
</诊疗经过>
<出院诊断>
1.焦虑障碍（间歇性惊恐发作）；2.高血压病
</出院诊断>
<出院情况>
患者神志清，饮食睡眠好，大小便正常，未诉特殊不适。
体查：血压120/80mmHg，心肺腹未见明显异常。
精神检查：意识清，定向全，接触交谈好，情绪稳定，否认幻觉，未引出妄想异常，注意力集中，智能可，自知力存在。
</出院情况>
<出院医嘱>
1、心身科门诊随访，不适随诊；
崔海松副主任医师门诊时间：周一上午专家门诊，周四下午普通门诊；
冯威副主任医师门诊时间：周二下午普通门诊、周四下午专家门诊；
2、健康宣教：按时服药，定期随访；
3、康复指导：坚持生物反馈和放松训练；
4、带药：
艾司西肽普兰片H10mg×14粒用法：每日一次，每次一粒，早餐后服用；
艾司唑仑片G1mg×14粒用法：每日一次，每次一粒，晚睡前服用；
缬沙坦氨氯地平片1s×14粒用法：每日一次，每次一粒，早餐前服用；
阿卡波糖片50mgx1盒用法：每日三次，每次一粒，三餐中服用
</出院医嘱>
</discharge>
