# Supplementary material for: Relation Extraction Based on Fusion Dependency Parsing from Chinese EMRs
Source: Hindawi journal article supplement (doi:10.1155/2020/8658040), 2020-06-08
Supplement: f1 [file 8658040.f1.zip › discharge/text/discharge81.xml]

<?xml version= "1.0" encoding="UTF-8"?>
<discharge>
<入院情况>
“发热4天”入院，查体：神志清楚，精神状态一般，查体合作，自动体位，咽部充血，扁桃体肿大，双肺呼吸音稍粗粗，双侧肺未闻及干、湿性罗音。
心浊音界未见异常，心率80次/分，律齐，P2不亢，各瓣膜听诊区未闻及病理性杂音，无心包摩擦音。
腹平软，无压痛、反跳痛，肝、脾肋下未触及，Murphy氏征阴性。
双下肢无浮肿
</入院情况>
<入院诊断>
1.白细胞减少2.扁桃体炎
</入院诊断>
<诊疗经过>
入院后完善相关检查，.乙肝两对半检查结果示乙肝表面抗体强阳性，余阴性，考虑患者肝功能异常与本次呼吸道感染有关，给予抗感染（头孢呋辛）及保肝（还原性谷胱甘肽）、补液等治疗，同时给予升白细胞（利可君）治疗，患者病情稳定，予出院，门诊随访
</诊疗经过>
<出院诊断>
1.扁桃体炎2.白细胞减少症3.肝功能异常
</出院诊断>
<出院情况>
患者病情较前好转，头痛较前明显好转，无恶心，体温正常，胃口改善，查体：神清，精神较前改善，查体合作，自动体位，咽部充血，扁桃体肿大较前减轻，双肺呼吸音稍粗，双侧肺未闻及干、湿性罗音。
心浊音界未见异常，心率80次/分，律齐，P2不亢，无心包摩擦音。
腹平软，无压痛、反跳痛，肝、脾肋下未触及，Murphy氏征阴性。
双下肢无浮肿
</出院情况>
<出院医嘱>
1、门诊随访：1周后门诊复查，周五上午陆紫敏主任专家门诊随诊。
2、健康宣教：加强锻炼，增强体质
3、康复指导：注意保暖，防止感冒，加强营养，如有不适，及时就诊
4.出院带药：
1）正柴胡*2盒每次1包，每天3次
2）维生素C*1盒每次1粒每天3次
3）多烯磷脂酰胆碱*2盒每次2粒每天3次
4）清咽滴丸每天3次每次4粒
</出院医嘱>
</discharge>
