# Supplementary material for: Relation Extraction Based on Fusion Dependency Parsing from Chinese EMRs
Source: Hindawi journal article supplement (doi:10.1155/2020/8658040), 2020-06-08
Supplement: f1 [file 8658040.f1.zip › discharge/text/discharge82.xml]

<?xml version= "1.0" encoding="UTF-8"?>
<discharge>
<入院情况>
发现侧颈部无痛性包块1月。
查体：患者颈软，无抵抗，气管居中，触诊甲状腺峡部可扪及一约12*10mm大小肿块，边界清，质地稍硬，无压痛，表面光滑，可随吞咽上下活动，未闻及明显血管杂音。
左、右侧甲状腺未及明显肿大。
</入院情况>
<入院诊断>
1.甲状腺肿物
</入院诊断>
<诊疗经过>
患者入院后完善相关检查，排除手术禁忌症，于2015年01月15日在全麻下行“左侧甲状腺次全切除术+峡部切除术”，手术顺利，术后予以抗炎、补液等对症支持治疗。
患者术后恢复好，病情平稳，详细向患者及家属交待病情及出院后注意事项，予以办理出院。
</诊疗经过>
<出院诊断>
1.左侧甲状腺结节性甲状腺肿
</出院诊断>
<出院情况>
患者一般情况好，未诉特殊不适。
查体：生命体征平稳未见明显异常，颈部切口敷料干结，切口无明显红肿及渗出。
</出院情况>
<出院医嘱>
1、门诊随访：周一三五上午吴社华副主任医师甲状腺专家门诊随访。
2、健康宣教：加强休息及营养，劳逸结合，注意监测甲状腺功能、定期复查甲状腺B超、腹部B超
3、康复指导：保持伤口干结，术后1周拆线。
</出院医嘱>
</discharge>
