# Supplementary material for: Relation Extraction Based on Fusion Dependency Parsing from Chinese EMRs
Source: Hindawi journal article supplement (doi:10.1155/2020/8658040), 2020-06-08
Supplement: f1 [file 8658040.f1.zip › discharge/text/discharge83.xml]

<?xml version= "1.0" encoding="UTF-8"?>
<discharge>
<入院情况>
患者系因“大便带血1月”入院，查体：腹平坦，无腹壁静脉曲张，腹部柔软，无压痛、反跳痛，腹部无包块。
肝脏肋下未触及，脾脏肋下未触及，Murphy氏征阴性，肾区无叩击痛，无移动性浊音。
肠鸣音未见异常，4次/分。
</入院情况>
<入院诊断>
1.乙状结肠肿瘤2.多发性结肠息肉3.高血压
</入院诊断>
<诊疗经过>
入院后完善相关检查，查无手术禁忌，予2014.1.7在全麻下行腹腔镜辅助乙状结肠癌根治术+右卵巢囊肿开窗引流+左输卵管伞囊肿切除术，手术顺利术后给予抗炎、补液、对症支持治疗。
现患者病情稳定，予出院，门诊随访
</诊疗经过>
<出院诊断>
1、乙状结肠隆起型中分化腺癌（pT3N1M0）2.右卵巢囊肿3.左输卵管伞囊肿4.多发性结肠息肉5.高血压
</出院诊断>
<出院情况>
患者无特殊不适主诉。
查体：伤口敷料包扎中，无明显渗出。
</出院情况>
<出院医嘱>
1.门诊随访，周二上午、周五全天门诊随诊。
2、健康宣教：结肠癌：1.饮食规律，富含纤维素饮食，养成定时排便习惯；2.术后3个月内忌肠镜检查，以免损伤吻合口；3.术后二年内每3个月复查，2~5年每半年复查；4.建议化疗。
3、康复指导：肿瘤术后：手术后三周后入院化疗，门诊随访。
</出院医嘱>
</discharge>
