# Supplementary material for: Relation Extraction Based on Fusion Dependency Parsing from Chinese EMRs
Source: Hindawi journal article supplement (doi:10.1155/2020/8658040), 2020-06-08
Supplement: f1 [file 8658040.f1.zip › discharge/text/discharge84.xml]

<?xml version= "1.0" encoding="UTF-8"?>
<discharge>
<入院情况>
因“发现血糖升高近10年，左下肢肿痛2周”入院，查体：T37.5℃，P80次/分，R20次/分，BP150/80mmHg，SaO2:99%，全身可见皮疹、色素沉着，部分脱屑，两肺未及明显干湿罗音，心律齐，未及明显杂音，腹软，未及压痛反跳痛，肋下可及肝缘。
左下肢浮肿，左小腿外侧及踝部红肿明显，轻触即疼痛明显。
足背动脉搏动未及。
病理征未及。
</入院情况>
<入院诊断>
1.左下肢软组织感染2.2型糖尿病3.高血压病3级，极高危组4.银屑病
</入院诊断>
<诊疗经过>
入院后完善相关检查，予以哌拉西林三唑巴坦），控制血糖（出院前调整为胰岛素30R30u-20u、二甲双胍、比格列酮）、活血化瘀改善循环，营养神经（丹参、前列地尔）等治疗，患者病情稳定，予出院，门诊随访。
</诊疗经过>
<出院诊断>
1.2型糖尿病伴左下肢软组织感染2.高血压病3级极高危组3.银屑病4.尿路感染5.中度贫血6.门脉增宽脾肿大
</出院诊断>
<出院情况>
无。
</出院情况>
<出院医嘱>
1、门诊随访：门诊随诊。
2、健康宣教：
3、康复指导：
</出院医嘱>
</discharge>
