# Supplementary material for: Relation Extraction Based on Fusion Dependency Parsing from Chinese EMRs
Source: Hindawi journal article supplement (doi:10.1155/2020/8658040), 2020-06-08
Supplement: f1 [file 8658040.f1.zip › discharge/text/discharge85.xml]

<?xml version= "1.0" encoding="UTF-8"?>
<discharge>
<入院情况>
患者因“不慎摔伤后右腕肿痛1小时余”入院，查体：右前臂石膏固定中，右腕肿胀，触痛，右腕主动活动受限，被动活动疼痛。
右手指活动可，感觉无明显异常。
X线：右桡骨远端骨折，右尺骨茎突骨折。
</入院情况>
<入院诊断>
1.右尺骨桡骨远端骨折
</入院诊断>
<诊疗经过>
入院后完善相关检查，2015-09-11全麻下行右桡骨远端骨折切开复位内固定术，术后予以预防感染、消肿、活血化瘀等治疗，患者病情稳定，要求出院，门诊随访。
</诊疗经过>
<出院诊断>
1.右尺骨桡骨远端骨折
</出院诊断>
<出院情况>
患者一般情况可，无发热，饮食及睡眠情况可，大小便正常。
查体：神情，精神可，手术切口无红肿，无明显渗血及渗液，未拆线，右上肢端感觉可，血运可，活动可。
</出院情况>
<出院医嘱>
1、门诊随访：门诊随诊。
每周二下午李山珠主任医师专家门诊，每周四上午闵晓晖副主任医师专家门诊，门诊预约电话66111442。
2、健康宣教：每2-3日切口换药，术后2周拆线。
3、康复指导：注意右腕及手各关节功能训练。
</出院医嘱>
</discharge>
