# Supplementary material for: Relation Extraction Based on Fusion Dependency Parsing from Chinese EMRs
Source: Hindawi journal article supplement (doi:10.1155/2020/8658040), 2020-06-08
Supplement: f1 [file 8658040.f1.zip › discharge/train/discharge1.xml]

<?xml version= "1.0" encoding="UTF-8"?>
<discharge>
<入院情况>
患儿，男，11月27天；因“发热3天伴咳嗽2天”入院。
查体：神清，气平，精神可，表情自然，查体欠配合。
T36.5℃，全身皮肤粘膜无黄染，浅表淋巴结未触及，咽部充血，扁桃体明显红肿，无渗出，双肺呼吸音粗，未及明显干湿罗音，频率26次/min。
心率112次/min，P2不亢，律齐，各瓣膜听诊区未及明显杂音。
腹平软，未见腹壁静脉曲张，腹部无压痛、反跳痛、肌紧张，Murphy's征（-），肝脾肋下未及，肠鸣音正常，4次/min。
NS（-）。
</入院情况>
<入院诊断>
1.急性支气管炎
</入院诊断>
<诊疗经过>
入院后完善相关检查，予以头孢呋辛抗感染，阿糖腺苷抗病毒，布地奈德雾化及补液等对症治疗。。患儿体温正常，咳嗽较前好转，皮疹较前减轻，一般情况可，予出院，门诊随访。
</诊疗经过>
<出院诊断>
1、急性支气管炎2、幼儿急疹
</出院诊断>
<出院情况>
患儿体温正常，头面部及躯干皮疹较前减轻，咳嗽较前好转，无气急、呼吸困难，无呕吐、腹泻、腹痛，精神可，胃纳可，睡眠可，大小便未见明显异常。
查体：神清，气平，精神可，表情自然，查体欠配合。
T36.8℃，全身皮肤粘膜无黄染，头面部及躯干可见红色斑丘疹，压之不褪色，浅表淋巴结未触及，咽部无明显红肿，扁桃体无明显红肿，无渗出，双肺呼吸音粗，未及明显干湿罗音，频率24次/min。
心率110次/min，P2不亢，律齐，各瓣膜听诊区未及明显杂音。
腹平软，未见腹壁静脉曲张，腹部无压痛、反跳痛、肌紧张，Murphy's征（-），肝脾肋下未及，肠鸣音正常。
NS（-）。
</出院情况>
<出院医嘱>
1、出院指导：已详细告知出院后家庭护理、喂养等各方面注意事项
2、出院治疗：头孢克洛干混悬剂0.5包/1次，3次/1天
百咳静糖浆5ml/1次，3次/1天
3、随访日期：儿科郑桂芬主任专家门诊随访。
</出院医嘱>
</discharge>
