# Supplementary material for: Relation Extraction Based on Fusion Dependency Parsing from Chinese EMRs
Source: Hindawi journal article supplement (doi:10.1155/2020/8658040), 2020-06-08
Supplement: f1 [file 8658040.f1.zip › discharge/train/discharge2.xml]

<?xml version= "1.0" encoding="UTF-8"?>
<discharge>
<入院情况>
患儿，男，5/30月；因“发现皮肤黄染1天”入院。
查体：足月儿貌，查体配合。
T36.5℃，头面部可及明显黄染，累及前胸，浅表淋巴结未触及，咽部无充血，双肺呼吸音清，未及明显干湿？音，频率40次/min。
心率130次/min，P2不亢，律齐，各瓣膜听诊区未及明显杂音。
腹平软，未见腹壁静脉曲张，未及明显包块，肝脾肋下未及，肠鸣音正常，4次/min。
原始反射可引出。
</入院情况>
<入院诊断>
1.新生儿高胆红素血症
</入院诊断>
<诊疗经过>
入院后完善相关检查，予以蓝光退黄，SB纠酸，头孢地秦抗感染，补液等支持等治疗，患者病情稳定，予出院，门诊随访
</诊疗经过>
<出院诊断>
1.新生儿高胆红素血症2.低蛋白血症
</出院诊断>
<出院情况>
患儿头面部及躯干无明显黄染，一般反应可，心率、呼吸平稳，无激惹、尖叫、抽搐，吃奶反应可。
查体：足月儿貌，查体不配合。
T37.0℃，头面部黄染不明显，浅表淋巴结未触及，咽部无充血，双肺呼吸音清，未及明显干湿？音，频率42次/min。
心率135次/min，P2不亢，律齐，各瓣膜听诊区未及明显杂音。
腹平软，未见腹壁静脉曲张，未及明显包块，肝脾肋下未及，肠鸣音正常，4次/min。
原始反射可引出。
</出院情况>
<出院医嘱>
1、出院指导：已详细告知出院后家庭护理、喂养等各方面注意事项
2、出院治疗：监测TCB变化情况
</出院医嘱>
</discharge>
