# Supplementary material for: Relation Extraction Based on Fusion Dependency Parsing from Chinese EMRs
Source: Hindawi journal article supplement (doi:10.1155/2020/8658040), 2020-06-08
Supplement: f1 [file 8658040.f1.zip › discharge/train/discharge3.xml]

<?xml version= "1.0" encoding="UTF-8"?>
<discharge>
<入院情况>
[中年男性患者，因“反复胸痛、咳嗽咳痰8天”入院。
患者于入院前8天无明显诱因下出现胸痛，胸痛性质不详，伴咳嗽、咳痰，痰为白色粘液状，伴纳差、乏力，无畏寒、寒战，无呼吸困难，无恶心、呕吐、腹痛、腹泻，无尿频、尿急、尿痛，无头痛、头晕，无皮疹、关节痛等。
至我院急诊就诊，查血常规示WBC5.2×10^9/L，N2.8×10^9/L，CRP2.5mg/L，PCT0.02ng/ml，胸部CT示右肺上叶炎性病变，考虑结核可能大，左肺上叶下舌段及与右肺散在炎症，两肺局限性肺气肿。
现为进一步诊治收入我科。
自发病来，食欲差，精神状态差，体重无明显变化，大便正常，小便正常]
</入院情况>
<入院诊断>
肺部感染
</入院诊断>
<诊疗经过>
入院后完善相关检查，予以左氧氟沙星及头孢美唑经验性抗感染治疗，营养支持（复方维生素）及改善心肌代谢（左卡尼丁）等治疗；，患者病情稳定，予出院，门诊随访
</诊疗经过>
<出院诊断>
社区获得性肺炎，非重症
</出院诊断>
<出院情况>
</出院情况>
<出院医嘱>
1、门诊随访：宋艳丽副主任医师专家门诊随诊。
2、健康宣教：注意休息，加强营养。
3、康复指导：加强营养，适当锻炼，提高免疫力，预防感染。
4、出院带药：
</出院医嘱>
</discharge>
