# Supplementary material for: Relation Extraction Based on Fusion Dependency Parsing from Chinese EMRs
Source: Hindawi journal article supplement (doi:10.1155/2020/8658040), 2020-06-08
Supplement: f1 [file 8658040.f1.zip › discharge/train/discharge4.xml]

<?xml version= "1.0" encoding="UTF-8"?>
<discharge>
<入院情况>
机械通气4月余。
</入院情况>
<入院诊断>
1.气管造口状态呼吸机依赖2.脑梗死后遗症混合性痴呆症状性癫痫3.冠状动脉粥样硬化性心脏病心律失常-阵发性房颤心功能III级（NYHA）4.2型糖尿病5.慢性阻塞性肺病稳定期6.便秘7.前列腺增生慢性膀胱炎8.低蛋白血症双侧胸腔积液9.肝功能不全10.中度贫血
</入院诊断>
<诊疗经过>
入院后完善相关检查，予以心电监护，呼吸机辅助通气（SIMV模式，f14次/分，Vt405ml，压力支持12cmH2O，PEEP5cmH2O，氧浓度35%），留置胃管及导尿管，化痰（氨溴索），保肝（复方甘草酸苷），监测血糖，抗板聚集（阿司匹林），控制心室率，强心（地高辛），提升血色素（促红素），营养支持治疗，促胃肠动力（伊托必利），通便（乳果糖），调节肠道菌群（米雅），奥卡西平止痫，胸腺肽α1增强免疫力等治疗，患者病情相对稳定，予出院
</诊疗经过>
<出院诊断>
1.气管造口状态呼吸机依赖2.脑梗死后遗症混合性痴呆症状性癫痫3.冠状动脉粥样硬化性心脏病心律失常-阵发性房颤心功能III级（NYHA）4.2型糖尿病5.慢性阻塞性肺病稳定期6.便秘7.前列腺增生慢性膀胱炎8.低蛋白血症双侧胸腔积液9.肝功能不全10.中度贫血
</出院诊断>
<出院情况>
患者无发热，无明显咳嗽、咳痰，无气促，鼻饲饮食畅，无呕吐。
查体：患者痴呆状，血压110/60mmHg，心率70次/分，律齐，指末氧100%，两肺底呼吸音低，腹软，四肢不肿。
</出院情况>
<出院医嘱>
1、门诊随访：定期复查心电图、Holter、胸片、肝肾功能、甲状腺功能、电解质、肿瘤标记物等变化。
患者多次查肿瘤标记物明显升高，恶性肿瘤不除外（消化道、前列腺），总体预后很差，甚至有发生癌栓猝死可能，病情反复告知患者家属，家属对预后表示充分理解。
2、健康宣教：加强营养支持，加强护理，防治褥疮及肺炎等并发症的发生。
3、康复指导：注意勤翻身，拍背辅助排痰，鼻饲饮食时需注意床头摇高30-45°，鼻饲前注意回抽，翻身时需注意关节部位保护，避免外力致关节脱位或骨折。
</出院医嘱>
</discharge>
