# Supplementary material for: Relation Extraction Based on Fusion Dependency Parsing from Chinese EMRs
Source: Hindawi journal article supplement (doi:10.1155/2020/8658040), 2020-06-08
Supplement: f1 [file 8658040.f1.zip › discharge/train/discharge6.xml]

<?xml version= "1.0" encoding="UTF-8"?>
<discharge>
<入院情况>
老年男性患者，发现血压升高30余年，头晕5天。
体检：神志清楚，精神状态良好，查体合作，自动体位，BP：138/80mmHg，R：18次/分，全身皮肤粘膜无黄染，无肝掌、蜘蛛痣，全身浅表淋巴结无肿大。
口唇无发绀，颈软无抵抗，气管居中，颈动脉搏动未见异常，颈静脉无怒张，肝颈静脉回流征阴性，甲状腺无肿大。
双肺呼吸音低，双下肺可及湿罗音，心浊音界未见异常，心率90次/分，律齐，P2不亢，各瓣膜听诊区未闻及病理性杂音，无心包摩擦音，剑突下心音未及增强。
腹平坦，无腹壁静脉曲张，腹部柔软，无压痛、反跳痛，肝脏肋下未触及，脾脏肋下未触及，Murphy氏征阴性，肠鸣音未见异常，4次/分。
双下肢无浮肿。
四肢肌力、肌张力未见异常，双侧Babinski征阴性。
</入院情况>
<入院诊断>
1.脑动脉供血不足2.心包积液3.胸腔积液4.高血压3级极高危组高血压性心脏病心律失常-阵发性房颤心功能III级（NYHA）5.冠状动脉粥样硬化性心脏病心功能III级（NYHA）6.重度骨质疏松腰椎骨折7.前列腺恶性肿瘤趋势治疗术后8.便秘9.白细胞减少症10.失眠
</入院诊断>
<诊疗经过>
入院后完善相关检查，予以维持窦律（胺碘酮），增强免疫力（胸腺法新）、平喘化痰（孟鲁斯特、氨溴索），调节胃肠道（酪酸梭菌活菌片、莫沙必利片、复方阿嗪米特肠溶片、埃索美拉唑）、通便（当归龙荟），改善头晕、头痛症状（倍他司汀、加味天麻胶囊），助眠（喹硫平、唑吡坦）、氟他胺拮抗雄激素，抑制肿瘤细胞生长、改善排尿症状（多沙唑嗪、氟他胺片）、玉屏风止汗等对症支持治疗，并予胸腔穿刺，患者病情稳定，予出院，门诊随访
</诊疗经过>
<出院诊断>
1.脑动脉供血不足2.胸腔积液3.高血压3级极高危组高血压性心脏病心律失常-阵发性房颤心功能III级（NYHA）4.冠状动脉粥样硬化性心脏病心功能III级（NYHA）5.重度骨质疏松腰椎骨折6.前列腺恶性肿瘤趋势治疗术后7.便秘8.白细胞减少症9.失眠
</出院诊断>
<出院情况>
患者现头晕症状较前好转，精神尚可，胃纳可，大小便未见明显异常。
查体：神清、气平，肺部听诊右下肺可及少量湿罗音，心律齐，未及明显杂音，腹软，无压痛，双下肢无浮肿。
</出院情况>
<出院医嘱>
1、门诊随访：门诊随诊。
每周二下午谢南姿主任专家门诊。
2、健康宣教：高血压：1）建议保持良好的生活习惯，低脂、食盐每日控制在6克以下。
2）低热量饮食，多吃新鲜蔬菜和水果，戒烟限酒，适当运动，减轻精神压力。
前列腺疾病：随着年龄的增长也会增长，应保持正常尿习惯，避免尿路感染，平时少吃刺激性食物，忌烟酒。
脑供血不足：1）注意保持良好姿势，低枕平卧。
2）适当进行颈部锻炼（如双手叉腰，进行点头、仰头、头部环形活动，屈颈、伸颈、颈部侧曲、旋转运动，双手交叉抱于枕后，两肩胛回缩放松训练及肩臂各向摆动、环绕训练）。
骨质疏松：1）运动锻炼、多晒太阳可以预防骨质疏松。
由于老年人心肺功能减弱，骨骼的强度下降，宜采用散步、慢跑、健康操等活动，每次不少于30分钟。
2） 膳食中应保证足够的蛋白质、碳水化合物、钙质及多种维生素。
食物中含钙较高的：虾皮、牛奶、骨头汤、鸡蛋、鲑鱼、豆腐、笕菜、菠菜、萝卜等。
3）此外在生活中应注意预防跌倒，避免骨折的发生。
3、康复指导：注意休息、预防受凉感冒，适当活动，在医师指导下规律用药。
</出院医嘱>
</discharge>
