# Supplementary material for: Relation Extraction Based on Fusion Dependency Parsing from Chinese EMRs
Source: Hindawi journal article supplement (doi:10.1155/2020/8658040), 2020-06-08
Supplement: f1 [file 8658040.f1.zip › discharge/train/discharge7.xml]

<?xml version= "1.0" encoding="UTF-8"?>
<discharge>
<入院情况>
患者因“胸闷心悸3天”入院。
查体：BP136/68mmHg。
神清，精神好，口唇无发绀，颈静脉无怒张，肝颈静脉回流征阴性，甲状腺无肿大，双肺呼吸音，双侧肺未闻及干、湿性罗音，心界无扩大，心率80次/分，律齐，未闻及病理性杂音，腹部柔软，无压痛、反跳痛，双下肢无水肿。
</入院情况>
<入院诊断>
1.心律失常不完全右束支传导阻滞偶发房性早搏2.2型糖尿病3.脂肪肝
</入院诊断>
<诊疗经过>
入院后完善相关检查，予以治疗过程等治疗，患者病情稳定，予出院，门诊随访
</诊疗经过>
<出院诊断>
1.心律失常不完全右束支传导阻滞偶发房性早搏2.2型糖尿病3.脂肪肝
</出院诊断>
<出院情况>
</出院情况>
<出院医嘱>
1.心内科门诊随访：
许嘉鸿主任：专家门诊：周五下午孙冰主任：专家门诊：周一上午
马文林主任：专家门诊：周三上午专病：周四下午
马军主任：专家门诊：周一下午刘洋主治：普通门诊：周一全天
邓良主治：普通门诊：周五全天赵翠梅主治：普通门诊：周四全天
2.一般健康宣教：戒烟，适度饮酒（男性每日不超过20-30克乙醇，一周不超过140克；女性每日不超过10-20克乙醇，一周不超过80克），适度运动（每周5-7天，每次30分钟，推荐慢跑、走路、骑车或游泳），放松心情，避免长时间情绪紧张，改变不良生活习惯。
健康的地中海饮食：多食蔬菜和水果（每日300-400克），推荐食用低脂乳制品或豆奶，推荐食用全谷物，每周至少食用2次鱼。
3.心内科专科健康宣教：
高血压：低盐饮食（每日摄盐少于5g），适度运动，规律遵医嘱服用降压药物，如有不适调整药物就医后遵医嘱调整，建议家中每日早晚测量血压并记录，门诊就医时携带血压记录并出示给医生，达到目标血压140/90mmHg内。
冠心病：低脂饮食，适度活动，避免劳累和情绪激动，控制好血压、血糖、血脂，规律遵医嘱长期服用相关药物，如需调整请就医；PCI术后患者请在半年到1年的时间内复查CAG，氯吡格雷需持续服用至少1年。
心律失常：避免剧烈运动和情绪激动、劳累，遵医嘱服用抗心律失常药物，定期复查心电图及Holter，药物调整及停用请就医后遵医嘱，不可擅自停药；服用“胺碘酮”的患者请定期复查甲状腺功能和胸片。
房颤患者如服用华法林，请定期1-2周门诊复查血凝常规（INR），根据INR调整华法林用量，目标INR2.0-3.0。
心力衰竭：限制每日饮水量，控制好血压，避免受凉等引起感染诱发心衰，长期遵医嘱服用抗心衰药物，建议每日慢走（或至心脏康复门诊就医来确定康复方案），避免劳累和情绪激动，注意有无水肿的发生，如出现胸闷、气促加重，请及早就医诊治。
建议每日称量晨起空腹排尿排便后体重，如体重3天内上升2公斤，请就医使用利尿。
建议定期接种肺炎链球菌、流感疫苗。
肥厚梗阻性心肌病：避免使用“洋地黄”药物及“硝酸酯”药物，避免劳累、较剧烈运动和情绪激动，规律遵医嘱服用药物，定期复查心超。
起搏器植入术后：避免接触强磁场（例如MRI、紧贴开动的微波炉），避免植入处强撞击，定期起搏器门诊随访（隔周周三下午，预约电话66111691）。
4.带药：
5.自备药物：硝酸异山梨酯片或硝酸甘油1-2粒胸闷痛时舌下含服，如5分钟内症状未能缓解，请迅速就近就医。
6.门诊另配：
</出院医嘱>
</discharge>
