# Supplementary material for: Relation Extraction Based on Fusion Dependency Parsing from Chinese EMRs
Source: Hindawi journal article supplement (doi:10.1155/2020/8658040), 2020-06-08
Supplement: f1 [file 8658040.f1.zip › discharge/train/discharge8.xml]

<?xml version= "1.0" encoding="UTF-8"?>
<discharge>
<入院情况>
因“左眼渐进性视物模糊1年”入院。
眼科检查：VD:0.02/＜J7（不能矫正），VS:0.1/＜J7（不能矫正），双眼结膜无充血，角膜明，前房清，瞳孔圆，直径3mm，对光反射灵敏。
双眼晶体皮质、核及后囊下混浊。
眼底：右眼黄斑萎缩、出血。
左眼近视性改变，网膜平伏，色泽红润，玻璃体腔混浊。
光定位及辨色力：正常。
眼压：右12.0mmHg，左13.0mmHg。
</入院情况>
<入院诊断>
1.双眼老年性白内障2.双眼屈光不正3.右眼黄斑变性
</入院诊断>
<诊疗经过>
患者入院后完善相关检查，于2015-09-17局麻下行“左眼Phaco+IOL植入术”。
术顺，术中植入+16.0D折叠式后房型人工晶体一枚于囊袋内，术后予“妥布霉素地塞米松眼液、托吡卡胺眼液”局部点眼，减轻眼内反应。
患者术后反应轻，视力提高，目前病情稳定，予以出院随访。
</诊疗经过>
<出院诊断>
1.双眼老年性白内障2.双眼屈光不正3.右眼黄斑变性
</出院诊断>
<出院情况>
患者无不适症状。
眼科检查：左眼：0.3（不能矫正），左眼结膜反应性充血，角膜透明，前房清，瞳孔尚圆，IOL位正，后囊膜明，眼底：视乳头（-），视网膜平伏，色红润。
眼压：Tn。
右眼同入院。
</出院情况>
<出院医嘱>
1.门诊随访，周三、五上午专家门诊复诊。
2.注意静休，忌剧烈运动及重体力劳动，忌辛辣刺激食物，避免强光刺激，避免污水入眼。
3.带药：妥布霉素地塞米松眼液5ml×1支，Sig：左眼每天四次
托吡卡胺眼液5ml×1支，Sig：左眼每晚一次
普拉洛芬滴眼液8ml×1支，Sig：左眼每天四次
左氧氟沙星眼用凝胶5ml×1支，Sig：左眼每晚一次
</出院医嘱>
</discharge>
