# Supplementary material for: Relation Extraction Based on Fusion Dependency Parsing from Chinese EMRs
Source: Hindawi journal article supplement (doi:10.1155/2020/8658040), 2020-06-08
Supplement: f1 [file 8658040.f1.zip › discharge/train/discharge9.xml]

<?xml version= "1.0" encoding="UTF-8"?>
<discharge>
<入院情况>
“甲状腺手术后3年余，反复抽搐2年余”查体：T：36.0℃，P：80次/分，R：18次/分，BP：140/80mmHg。
神志清楚，精神状态一般，颈软，甲状腺无肿大，无压痛、震颤、血管杂音。
双肺呼吸音清晰，双侧肺未闻及干、湿性罗音。
心率80次/分，律齐，各瓣膜听诊区未闻及病理性杂音，腹平坦，腹部柔软，无压痛、反跳痛，肝脾肋下未触及，双下肢无浮肿。
束臂加压试验阳性。
</入院情况>
<入院诊断>
1.结节性甲状腺肿术后，甲状旁腺功能减退症，原发性甲状腺功能减退症2.冠状动脉粥样硬化性心脏病，PCI术后，心功能II级（NYHA)3.高血压病3级，极高危组4.慢性支气管炎
</入院诊断>
<诊疗经过>
入院后完善相关检查，予以补钙、补充维生素D、抗感染（头孢他啶）、化痰（氨溴索）、平喘（孟鲁司特、甲泼尼龙）、扩冠（单硝酸异山梨酯）、降压（硝苯地平阿罗洛尔）、护胃（埃索美拉唑、多潘立酮）、活血（丹参）等对症支持治疗，现患者病情稳定，予出院，门诊随访
</诊疗经过>
<出院诊断>
1.结节性甲状腺肿术后，甲状旁腺功能减退症，原发性甲状腺功能减退症2.冠状动脉粥样硬化性心脏病，PCI术后，心功能II级（NYHA)3.高血压病3级，极高危组4.慢性支气管炎
</出院诊断>
<出院情况>
</出院情况>
<出院医嘱>
1、门诊随访：门诊随诊。
2、健康宣教：
</出院医嘱>
</discharge>
