# Supplementary material for: Relation Extraction Based on Fusion Dependency Parsing from Chinese EMRs
Source: Hindawi journal article supplement (doi:10.1155/2020/8658040), 2020-06-08
Supplement: f1 [file 8658040.f1.zip › discharge/train/discharge10.xml]

<?xml version= "1.0" encoding="UTF-8"?>
<discharge>
<入院情况>
主诉：“反复胸闷、气急1年余，再发1周”。
</入院情况>
<入院诊断>
1.乙肝后肝硬化失代偿期门静脉高压腹水2.左前臂骨折3.胆管结石伴胆囊炎4.双肾囊肿
</入院诊断>
<诊疗经过>
入院后完善相关检查，予以治疗过程等治疗，患者病情稳定，予出院，门诊随访
</诊疗经过>
<出院诊断>
1.乙肝后肝硬化失代偿期门静脉高压腹水2.左前臂骨折3.胆管结石伴胆囊炎4.双肾囊肿
</出院诊断>
<出院情况>
神清，精神可，双肺呼吸音粗，未闻及明显罗音，心率75次/分，律齐，未闻及病理性杂音，腹平软，无压痛、反跳痛，肝脾肋下未及，}Murphy氏征阴性，肝肾区无叩击痛，叩鼓音，无移动性浊音。
肠鸣音4次/分。
</出院情况>
<出院医嘱>
1、门诊随访：消化科门诊随诊，如有不适随时就诊。
消化科专家门诊时间：每周二下午和周三上午张东伟主任专家门诊。
消化科专病门诊时间表：
每周一下午：胆胰疾病；每周二下午：胃食管反流疾病
每周三下午：消化道息肉；每周四下午：脂肪肝
每周五下午：慢性腹泻；
消化科普通门诊时间：每周一至周日上午、下午。
2、健康宣教：（1）养成良好的生活规律：肝硬化肝功能代偿期患者，可以同正常人一样生产、劳动、工作和学习，但应劳逸结合，活动以不感疲劳为度。
肝功能失代偿期或有并发症者应以卧床休息为主。
（2）进食高蛋白质、高维生素、高热量且易消化的食物。
如果肝功能显著减退或血氨偏高或有肝性脑病先兆时，应严格限制蛋白质食物，有腹水者饮食应少盐或无盐饮食；限制进水量，一般每天不超过1000ml；如有显著低钠血症则应限制在500ml；有食道静脉曲张时，要食细软食物；对有出血的患者禁食；严禁饮酒。
（3）按医嘱服药：不能随便停药或减药、加药，一有不适，立即来医就诊；如服用利尿药者，应记录尿量，如出现心悸、无力，及时就医。
（4）保肝大便通畅，每天1-2次。
（5）定期到医院复查肝功能、甲胎蛋白、肾功能、电解质、CEA、上腹部超声波等检查。
若突然出现呕血、黑便、头昏、心悸、出汗、口渴、黑？或晕厥等表现时，应立即送医院诊治；如出现性格、行为异常及意识障碍、双手扑动样震颤等，应考虑可能发生肝性脑病，应立即送医院诊治。
3、出院带药：
</出院医嘱>
</discharge>
