# Supplementary material for: Relation Extraction Based on Fusion Dependency Parsing from Chinese EMRs
Source: Hindawi journal article supplement (doi:10.1155/2020/8658040), 2020-06-08
Supplement: f1 [file 8658040.f1.zip › discharge/train/discharge11.xml]

<?xml version= "1.0" encoding="UTF-8"?>
<discharge>
<入院情况>
因“多关节肿痛近2月”入院。
查体：脊柱正常生理弯曲，四肢活动尚自如，无畸形、下肢静脉曲张、杵状指（趾）。
双侧4字征（+）、左侧明显，双膝、右踝、右PIP1、右腕关节肿胀、轻压痛、皮温偏高。
指地距10cm、枕墙距0cm。
</入院情况>
<入院诊断>
1.关节痛待查：脊柱关节病？反应性关节炎？2.肝功能异常
</入院诊断>
<诊疗经过>
入院后完善相关检查，行T-SPOT排除结核感染，最后考虑诊断为未分化脊柱关节病，予抗炎抑制免疫：氯诺昔康8mgbid，甲泼尼龙4mgqd+柳氮磺吡啶0.5gtid+羟氯喹200mgqd，改善骨代谢（鹿胍多肽），活血（疏血通），护肝（异甘草酸镁），抗氧化（硫辛酸）等治疗，目前病情平稳，予出院。
</诊疗经过>
<出院诊断>
1.未分化脊柱关节病2.肝功能异常
</出院诊断>
<出院情况>
关节肿痛较前好转，右侧腰臀部疼痛。
</出院情况>
<出院医嘱>
1.风湿科门诊随诊，自费患者请保管好就诊磁卡，用住院同一磁卡挂号；
(1)汤建平专家门诊时间：周二、四上午，周一上午大华门诊部；
程？副主任医师专家门诊时间：周三下午、周五上午。
痛风专病门诊：周一及周四下午。
普通门诊周一至周五全天，周六及周日上午
病房咨询电话:66111086（下午2-4:00）
(2)就诊时请携带:出院小结、影像学资料（片子）、化验单；
(3)定期复查血常规、肝肾功能、CRP、血沉、免疫球蛋白等。
2.康复指导，健康宣教：
(1)激素和/或免疫抑制剂应用中，如有不适及时风湿科就诊，避免感染
(2)AS:坚持锻炼（游泳、体操、太极拳），保持正确姿势
3.风湿科相关药物不良反应：无
4出院随访计划：每月注意复查血常规、肝肾功能，预约床位，电话预约时间（周一至周五下午2：00-4：00），预约电话（66111086）
5带药：如有不良反应及时就诊
泼尼松5mg×100s×1盒：用法：每次2粒，每天1次早晨顿服
羟氯喹 0.1×14s×3盒：用法：每次2粒，每天1次口服
柳氮磺吡啶0.25×60s×2盒：用法：每次2粒，每天3次口服
复方杜仲健骨颗粒：用法：每次1包，每天2次口服
洛索洛芬60mg×20s×2盒：用法：每次1粒，每天3次口服
自备药物
自备药物：
</出院医嘱>
</discharge>
