# Supplementary material for: Relation Extraction Based on Fusion Dependency Parsing from Chinese EMRs
Source: Hindawi journal article supplement (doi:10.1155/2020/8658040), 2020-06-08
Supplement: f1 [file 8658040.f1.zip › discharge/train/discharge12.xml]

<?xml version= "1.0" encoding="UTF-8"?>
<discharge>
<入院情况>
“颜面部、双下肢水肿、下肢无力2年”。
体检：T：36.0℃，P：80次/分，R：18次/分，BP：120/80mmHg。
神清，精神状态一般，多血质面容，颈软，甲状腺无肿大，双肺呼吸音粗，双侧肺未闻及干、湿性罗音。
心率80次/分，律齐，各瓣膜听诊区未闻及病理性杂音，腹平坦，腹部柔软，无压痛、反跳痛，肝脾肋下未触及，双下肢浮肿。
</入院情况>
<入院诊断>
1.库欣综合征2.2型糖尿病3.肺部感染4.泌尿道感染5.高血压病
</入院诊断>
<诊疗经过>
入院后完善相关检查，予以控制血糖（胰岛素、比格列酮二甲双胍）、抗感染（头孢他啶）、抗氧化（硫辛酸），降压（维拉帕米缓释片），改善骨质疏松（维生素D碳酸钙、阿法骨化醇胶囊）及对症支持等治疗，患者病情稳定，予出院，门诊随访。
</诊疗经过>
<出院诊断>
1.库欣综合征双侧肾上腺腺瘤2.2型糖尿病3.肺部感染4.泌尿道感染5.高血压病6.骨质疏松7.甲状腺结节8.垂体微腺瘤可能
</出院诊断>
<出院情况>
患者未诉特殊不适。
查体：神志清楚，精神状态一般，多血质面容，颈软，甲状腺无肿大，无压痛、震颤、血管杂音。
双肺呼吸音粗，双侧肺未闻及干、湿性罗音。
心率82次/分，律齐，各瓣膜听诊区未闻及病理性杂音，腹平软，无压痛、反跳痛，肝脾肋下未触及，双下肢轻度浮肿。
</出院情况>
<出院医嘱>
1、门诊随访：门诊随诊。
2、健康宣教：一)、遵医嘱定期内分泌科门诊随访。
每周二下午赵家胜主任医师内分泌专家门诊。
泌尿外科随访。
定期复查三大常规、肝肾功能电解质、血脂、血糖、HbA1c、尿蛋白、甲状腺功能、血管B超、眼底检查、心电图等。
如有不适及时就诊。
二)、低盐低脂糖尿病饮食，适当运动，戒烟戒酒，避免吸入二手烟，自我监测血压血糖，避免低血糖发生，定期参加糖尿病教育(我科门诊有具体安排记录)。
三）出院带药：
比格列酮二甲双胍片*2盒sig:每日2次每次1片餐后口服
人胰岛素R笔芯J×3支sig:早16U，中16U，晚16U餐前30分钟皮下注射
甘精胰岛素注射液G×2支sig:20U晚9点皮下注射
维拉帕米缓释片H（0.24g）×3盒sig:每日1次每次1片口服
骨化三醇软胶囊G（0.25ug）×2盒sig:每日1次每次1粒口服
备用
格列齐特缓释片sig:每日1次每次2粒餐前口服
</出院医嘱>
</discharge>
