# Supplementary material for: Relation Extraction Based on Fusion Dependency Parsing from Chinese EMRs
Source: Hindawi journal article supplement (doi:10.1155/2020/8658040), 2020-06-08
Supplement: f1 [file 8658040.f1.zip › discharge/train/discharge13.xml]

<?xml version= "1.0" encoding="UTF-8"?>
<discharge>
<入院情况>
患者，男，52岁，因“突发头痛、呕吐伴意识障碍9天。
”入院。
查体：神志嗜睡，右侧瞳孔2.0mm，左侧瞳孔2.5mm，对光反射存在，右侧肢体肌力I级，左侧肢体肌力IV，右侧肢体肌张力稍偏高，左侧肌张力基本正常，双侧巴氏征（-），脑膜刺激征（-）。
有高血压、糖尿病、肾功能不全、肺部感染和右侧小脑梗塞病史。
头颅CT：左侧丘脑出血并破入脑室，右侧小脑梗塞。
</入院情况>
<入院诊断>
1、左侧丘脑出血并破入脑室；2、高血压病；3、糖尿病；4、肾功能不全；5、肺部感染；6、右侧小脑梗塞后。
</入院诊断>
<诊疗经过>
入院后完善相关检查，予以改善脑代谢、化痰、控制血糖等治疗，病程中出现消化道出血，给予止血、抑酸、补液等治疗。
未输血。
</诊疗经过>
<出院诊断>
1、左侧丘脑出血并破入脑室；2、高血压病；3、糖尿病；4、肾功能不全；5、肺部感染；6、右侧小脑梗塞后。
7、上消化道出血。
</出院诊断>
<出院情况>
患者住院期间并发多器官功能衰竭，血压下降，叹息样呼吸。
查体：神志昏迷，双侧瞳孔等大等圆，对光反射消失。
疼痛刺激四肢无反应，双侧巴氏征（-）。
患者病情危重，随时有死亡可能，患者家属知情后要求自动出院。
</出院情况>
<出院医嘱>
1、病情变化随诊。
（每周三上午海舰专家门诊）
2、健康宣教： （1）应用降压药物，需监测血压；（2）应用降糖药物，需监测血糖，严防低血糖发生；（3）忌/戒烟酒，饮食以低脂、低盐（高血压者）、低糖、少渣、丰富维生素、纤维素为原则；避免情绪波动；（4）患者生活无法自理，需加强护理，定时翻身、拍背、加强营养，减少褥疮出现、防治坠积性肺炎；预防深静脉血栓形成；建议每日鼻饲流质量1500ml，坐位或半坐位分5餐鼻饲管内注入，维持该体位至少半小时，以免返流、误吸、窒息；定期更换胃管、导尿管。
4、康复指导：建议当地医院继续治疗。
</出院医嘱>
</discharge>
