# Supplementary material for: Relation Extraction Based on Fusion Dependency Parsing from Chinese EMRs
Source: Hindawi journal article supplement (doi:10.1155/2020/8658040), 2020-06-08
Supplement: f1 [file 8658040.f1.zip › discharge/train/discharge14.xml]

<?xml version= "1.0" encoding="UTF-8"?>
<discharge>
<入院情况>
患者因“发现血压升高2天”入院。
查体：T：36.8℃，P：62次/分，R：18次/分，BP：220/130mmHg。
一般情况：神志清楚，精神状态良好，全身浅表淋巴结无肿大，口唇无发绀，颈静脉无怒张，肝颈静脉回流征阴性，甲状腺无肿大，双肺呼吸音，双侧肺未闻及干、湿性罗音，心界无扩大，心率62次/分，律齐，P2不亢，各瓣膜听诊区未闻及病理性杂音，无心包摩擦音，剑突下心音未及增强，腹部柔软，无压痛、反跳痛，双下肢无水肿，双侧Babinski征阴性。
</入院情况>
<入院诊断>
高血压病3级高危组
</入院诊断>
<诊疗经过>
入院后完善相关检查，予以予奥美沙坦、硝苯地平、乌拉地尔降压、抗血小板等治疗。
入院后查肾功肌酐高，蛋白尿，后血压波动较大，血压最高仍可达190/102mmHg，降压药物调整为氯沙坦钾100mgqd+氢氯噻嗪25mgqd+硝苯地平控释片30mgbid+比索洛尔2.5mgqd，患者病情稳定，予出院，门诊随访
</诊疗经过>
<出院诊断>
</出院诊断>
<出院情况>
</出院情况>
<出院医嘱>
1.门诊随访：周三全天、周四上午方宏主任专家门诊，周四全天刘如辉
</出院医嘱>
</discharge>
