# Supplementary material for: Relation Extraction Based on Fusion Dependency Parsing from Chinese EMRs
Source: Hindawi journal article supplement (doi:10.1155/2020/8658040), 2020-06-08
Supplement: f1 [file 8658040.f1.zip › discharge/train/discharge15.xml]

<?xml version= "1.0" encoding="UTF-8"?>
<discharge>
<入院情况>
主诉：“间断上腹部隐痛20余天”。
查体：T：36.0℃，P：75次/分，R：18次/分，BP：125/85mmHg。
双肺呼吸音粗，双侧肺未闻及干、湿性罗音，心律齐，未闻及病理性杂音，无心包摩擦音，剑突下心音未及增强。
腹平坦，无腹壁静脉曲张，腹部柔软，无压痛、反跳痛，腹部无包块。
肝脏肋下未触及，脾脏肋下未触及，Murphy氏征阴性，肝肾区无叩击痛，叩鼓音，无移动性浊音。
肠鸣音4次/分。
双下肢无水肿，
</入院情况>
<入院诊断>
1.十二指肠球部溃疡2.慢性浅表-萎缩性胃窦炎伴糜烂
</入院诊断>
<诊疗经过>
入院后完善相关检查，予以治疗过程等治疗，患者病情稳定，予出院，门诊随访
</诊疗经过>
<出院诊断>
1.十二指肠球部溃疡2.慢性浅表-萎缩性胃窦炎伴糜烂
</出院诊断>
<出院情况>
神清，精神可，双肺呼吸音粗，未闻及明显罗音，心率75次/分，律齐，未闻及病理性杂音，腹平软，无压痛、反跳痛，肝脾肋下未及，}Murphy氏征阴性，肝肾区无叩击痛，叩鼓音，无移动性浊音。
肠鸣音4次/分。
</出院情况>
<出院医嘱>
1、门诊随访：消化科门诊随诊，如有不适随时就诊。
消化科专家门诊时间：每周五上午王晓蕾副主任医师专家门诊、每周二下午和周三上午张东伟主任专家门诊。
消化科专病门诊时间表：
每周一下午：胆胰疾病；每周二下午：胃食管反流疾病
每周三下午：消化道息肉；每周四下午：脂肪肝
每周五下午：慢性腹泻；
消化科普通门诊时间：每周一至周日上午、下午。
2、健康宣教：
（1）保持乐观的情绪，生活规律，戒烟戒酒。
（2）养成良好的饮食规律：少食多餐，定时进餐，多吃易消化、有营养的食物，忌辛辣、牛奶、咖啡、浓茶等。
（3）按医嘱正确服药：总疗程6-8周，如合并幽门螺旋杆菌感染，建议疗程结束后停药4周复查呼气试验了解HP有无根除；胃溃疡建议疗程结束后复查胃镜。
不宜服用或慎服的药物：辛可芬、保泰松、利舍平、吲哚美辛、阿司匹林、氯吡格雷等；如果患者必须服用上述药物，建议在医生的指导下使用。
（4）适度运动：体育锻炼不仅能提高体质，还可增强自身抗病能力。
（5）定期复诊：若上腹疼痛节律发生变化并加剧，或者出现呕血、黑便等，应立即就诊，完善胃镜等检查。
3、出院带药：
</出院医嘱>
</discharge>
