# Supplementary material for: Relation Extraction Based on Fusion Dependency Parsing from Chinese EMRs
Source: Hindawi journal article supplement (doi:10.1155/2020/8658040), 2020-06-08
Supplement: f1 [file 8658040.f1.zip › progress/progressEntity/progress1.xml.ent]

C=胸痛 P=71:73 T=symptom A=present
C=心悸 P=74:76 T=symptom A=present
C=心前区疼痛 P=102:107 T=symptom A=present
C=心悸 P=108:110 T=symptom A=present
C=恶心 P=112:114 T=symptom A=absent
C=呕吐 P=115:117 T=symptom A=absent
C=大汗 P=119:121 T=symptom A=absent
C=晕厥 P=123:125 T=symptom A=absent
C=黑朦 P=126:128 T=symptom A=absent
C=放射痛 P=131:134 T=symptom A=absent
C=闷痛 P=136:138 T=symptom A=present
C=眩晕 P=158:160 T=symptom A=absent
C=晕厥 P=161:163 T=symptom A=absent
C=心脏ECT P=180:185 T=test
C=冠脉造影检查 P=186:192 T=test
C=胸痛 P=203:205 T=symptom A=present
C=胸痛 P=232:234 T=symptom A=present
C=疼痛 P=244:246 T=symptom A=absent
C=胸痛 P=252:254 T=symptom A=present
C=心悸不适 P=265:269 T=symptom A=present
C=出汗 P=272:274 T=symptom A=absent
C=晕厥 P=276:278 T=symptom A=absent
C=黑朦 P=279:281 T=symptom A=absent
C=消瘦 P=283:285 T=symptom A=absent
C=食欲减退 P=286:290 T=symptom A=absent
C=纳差 P=291:293 T=symptom A=absent
C=心电图检查 P=301:306 T=test
C=房早三联律 P=316:321 T=symptom A=present
C=T波改变 P=322:326 T=symptom A=present
C=胸部CT P=341:345 T=test
C=肝脏多发囊肿 P=352:358 T=symptom A=present
C=肝左叶斑点状钙化灶 P=359:368 T=disease A=present
C=血常规 P=370:373 T=symptom
C=血糖 P=374:376 T=test
C=肾功能 P=377:380 T=test
C=电解质血钾 P=383:388 T=test
C=脑钠肽前体 P=406:411 T=test
C=心律失常 P=426:430 T=disease A=possible
C=生化 P=506:508 T=test
C=心电图 P=509:512 T=test
C=胸部CT P=513:517 T=test
C=心电图检查 P=522:527 T=test
C=房早三联律 P=537:542 T=symptom
C=T波改变 P=543:547 T=symptom A=present
C=胸部CT P=562:566 T=test
C=肝脏多发囊肿 P=573:579 T=symptom A=present
C=肝左叶斑点状钙化灶 P=580:589 T=disease A=present
C=血常规 P=591:594 T=test
C=血糖 P=595:597 T=test
C=肾功能 P=598:601 T=test
C=电解质血钾 P=604:609 T=test
C=脑钠肽前体 P=627:632 T=test
C=肝炎 P=651:653 T=disease A=absent
C=结核 P=654:656 T=disease A=absent
C=疟疾 P=657:659 T=disease A=absent
C=血吸虫病史 P=660:665 T=disease A=absent
C=高血压病史 P=667:672 T=disease A=present
C=波依定 P=693:696 T=treatment A=present
C=缬沙坦 P=697:700 T=treatment A=present
C=心脏病史 P=719:723 T=disease A=present
C=糖尿病 P=726:729 T=disease A=absent
C=脑血管疾病 P=730:735 T=disease A=absent
C=精神疾病史 P=736:741 T=disease A=absent
C=输血史 P=747:750 T=disease A=absent
C=磺胺类药物过敏史 P=755:763 T=disease A=family
C=心律失常 P=791:795 T=disease A=possible
C=频发房早 P=796:800 T=disease A=possible
C=高血压病 P=802:806 T=disease A=possible
C=护理常规 P=833:837 T=treatment A=present
C=II级护理 P=838:843 T=treatment A=present
C=低盐低脂饮食 P=844:850 T=treatment A=present
C=营养心肌 P=921:925 T=treatment A=present
C=抗心律失常治疗 P=926:933 T=treatment A=present
