# Supplementary material for: Relation Extraction Based on Fusion Dependency Parsing from Chinese EMRs
Source: Hindawi journal article supplement (doi:10.1155/2020/8658040), 2020-06-08
Supplement: f1 [file 8658040.f1.zip › progress/progressEntity/progress2.xml.ent]

C=DVR术后 P=68:73 T=disease A=present
C=胸闷 P=76:78 T=symptom A=present
C=气促 P=79:81 T=symptom A=present
C=二尖瓣脱垂 P=95:100 T=symptom A=present
C=重度反流 P=101:105 T=symptom A=present
C=主动脉瓣反流 P=106:112 T=symptom A=present
C=主动脉瓣置换术 P=120:127 T=treatment A=history
C=华法林 P=141:144 T=treatment A=history
C=胸闷 P=159:161 T=symptom A=present
C=气促 P=162:164 T=symptom A=present
C=胸痛 P=183:185 T=symptom A=absent
C=放射痛 P=186:189 T=symptom A=absent
C=晕厥 P=191:193 T=symptom A=absent
C=黑朦 P=194:196 T=symptom A=absent
C=心慌 P=201:203 T=symptom A=occasional
C=双下肢水肿 P=204:209 T=symptom A=occasional
C=托拉塞米 P=214:218 T=treatment A=history
C=心超 P=236:238 T=test
C=全心扩大 P=241:245 T=symptom A=present
C=左室收缩功能重度减退 P=246:256 T=symptom A=present
C=人工机械二尖瓣轻度瓣周反流 P=257:270 T=symptom A=present
C=肺动脉高压 P=271:276 T=symptom A=present
C=轻中度三尖瓣反流 P=277:285 T=symptom A=present
C=心电图 P=287:290 T=test
C=房扑 P=293:295 T=symptom A=present
C=不规则房室传导 P=296:303 T=symptom A=present
C=夜眠差 P=334:337 T=symptom A=present
C=心电图 P=388:391 T=test
C=房扑 P=392:394 T=symptom A=present
C=不规则房室传导 P=395:402 T=symptom A=present
