# Supplementary material for: Relation Extraction Based on Fusion Dependency Parsing from Chinese EMRs
Source: Hindawi journal article supplement (doi:10.1155/2020/8658040), 2020-06-08
Supplement: f1 [file 8658040.f1.zip › progress/progressEntity/progress3.xml.ent]

C=胸闷 P=70:72 T=symptom A=present
C=胸闷 P=99:101 T=symptom A=conditional
C=发热 P=121:123 T=symptom A=absent
C=胸痛 P=125:127 T=symptom A=absent
C=放射痛 P=128:131 T=symptom A=absent
C=心悸 P=133:135 T=symptom A=absent
C=大汗 P=136:138 T=symptom A=absent
C=黑朦 P=140:142 T=symptom A=absent
C=晕厥 P=143:145 T=symptom A=absent
C=咳嗽 P=147:149 T=symptom A=absent
C=咳痰 P=150:152 T=symptom A=absent
C=咯血 P=154:156 T=symptom A=absent
C=气促 P=158:160 T=symptom A=absent
C=呼吸困难 P=161:165 T=symptom A=absent
C=反酸 P=167:169 T=symptom A=absent
C=烧心 P=170:172 T=symptom A=absent
C=呼吸困难 P=180:184 T=symptom A=absent
C=颜面四肢水肿 P=193:199 T=symptom A=absent
C=冠脉造影术 P=210:215 T=treatment A=history
C=血管病变 P=217:221 T=disease A=present
C=胸闷痛发作 P=255:260 T=symptom A=absent
C=气促 P=262:264 T=symptom A=absent
C=呼吸困难 P=265:269 T=symptom A=absent
C=颜面四肢水肿 P=271:277 T=symptom A=absent
C=冠状动脉粥样硬化性心脏病 P=322:334 T=disease A=possible
C=PCI术后 P=335:340 T=disease A=present
C=心功能I级 P=341:346 T=disease A=possible
C=高血压病 P=354:358 T=disease A=possible
C=2型糖尿病 P=367:372 T=disease A=possible
C=护理常规 P=393:397 T=treatment A=present
C=抗血小板聚集 P=402:408 T=treatment A=present
C=调酯 P=409:411 T=treatment A=present
C=扩冠 P=412:414 T=treatment A=present
C=营养心肌 P=415:419 T=treatment A=present
C=改善循环 P=420:424 T=treatment A=present
