# Supplementary material for: Relation Extraction Based on Fusion Dependency Parsing from Chinese EMRs
Source: Hindawi journal article supplement (doi:10.1155/2020/8658040), 2020-06-08
Supplement: f1 [file 8658040.f1.zip › progress/progressEntity/progress4.xml.ent]

C=右侧颞顶枕胶质母细胞瘤术 P=72:84 T=treatment A=history
C=头晕 P=89:91 T=symptom A=present
C=右侧颞顶枕胶质母细胞瘤 P=104:115 T=disease A=present
C=手术治疗 P=132:136 T=treatment A=history
C=抗感染 P=141:144 T=treatment A=history
C=伽马刀治疗 P=169:174 T=treatment A=history
C=头晕 P=184:186 T=symptom A=present
C=恶心 P=188:190 T=symptom A=present
C=呕吐 P=192:194 T=symptom A=absent
C=癫痫发作 P=196:200 T=symptom A=absent
C=精神萎靡 P=212:216 T=symptom A=present
C=食欲不振 P=217:221 T=symptom A=present
C=糖尿病 P=238:241 T=disease A=absent
C=高血压病史 P=242:247 T=disease A=absent
C=冠心病 P=251:254 T=disease A=absent
C=脑卒中史 P=255:259 T=disease A=absent
C=肝炎 P=263:265 T=disease A=absent
C=结核 P=266:268 T=disease A=absent
C=传染病史 P=269:273 T=disease A=absent
C=右侧颞顶枕胶质母细胞瘤 P=284:295 T=disease A=present
C=手术治疗 P=299:303 T=treatment A=present
C=外伤史 P=311:314 T=disease A=absent
C=药物过敏史 P=320:325 T=disease A=absent
C=输血史 P=327:330 T=disease A=present
C=头颅MRI P=350:355 T=test
C=右颞顶枕胶质母细胞瘤术后复发 P=356:370 T=disease A=present
C=护理常规 P=445:449 T=treatment A=present
C=脱水减轻脑水肿 P=455:462 T=treatment A=present
C=营养支持 P=463:467 T=treatment A=present
C=止吐 P=468:470 T=treatment A=present
