# Supplementary material for: Relation Extraction Based on Fusion Dependency Parsing from Chinese EMRs
Source: Hindawi journal article supplement (doi:10.1155/2020/8658040), 2020-06-08
Supplement: f1 [file 8658040.f1.zip › progress/progressEntity/progress5.xml.ent]

C=咳嗽 P=72:74 T=symptom A=present
C=发热 P=82:84 T=symptom A=present
C=咳嗽 P=103:105 T=symptom A=conditional
C=阵发性连声咳 P=107:113 T=symptom A=conditional
C=痰 P=115:116 T=symptom A=absent
C=气喘 P=127:129 T=symptom A=absent
C=气急 P=130:132 T=symptom A=absent
C=呼吸困难 P=133:137 T=symptom A=absent
C=咳嗽 P=155:157 T=symptom A=present
C=有痰 P=160:162 T=symptom A=present
C=发热 P=169:171 T=symptom A=present
C=小儿清热止咳颗粒 P=180:188 T=treatment A=history
C=发热 P=211:213 T=symptom A=present
C=血常规 P=228:231 T=test
C=白细胞升高 P=232:237 T=symptom A=present
C=胸片 P=254:256 T=test
C=两肺纹理增多 P=258:264 T=disease A=present
C=右肺内带见斑片状密度增高影 P=268:281 T=disease A=present
C=支气管炎 P=286:290 T=disease A=present
C=血常规 P=317:320 T=test
C=WBC P=321:324 T=test
C=N P=335:336 T=test
C=Ly P=342:344 T=test
C=RBC P=350:353 T=test
C=HBG P=364:367 T=test
C=PLT P=374:377 T=test
C=CRP P=387:390 T=test
C=胸片 P=416:418 T=test
C=两肺纹理增多 P=419:425 T=disease A=present
C=右肺内带见斑片状密度增高影 P=429:442 T=disease A=present
C=支气管炎 P=461:465 T=disease A=possible
C=抗感染 P=531:534 T=treatment A=present
C=阿奇霉素 P=575:579 T=treatment A=present
C=头孢比肟 P=581:585 T=treatment A=present
C=抗感染治疗 P=585:590 T=treatment A=present
C=对症支持治疗 P=594:600 T=treatment A=present
C=止咳 P=603:605 T=treatment A=present
C=化痰 P=606:608 T=treatment A=present
C=补液 P=609:611 T=treatment A=present
C=对症支持治疗 P=612:618 T=treatment A=present
