# Supplementary material for: Relation Extraction Based on Fusion Dependency Parsing from Chinese EMRs
Source: Hindawi journal article supplement (doi:10.1155/2020/8658040), 2020-06-08
Supplement: f1 [file 8658040.f1.zip › progress/progressEntity/progress6.xml.ent]

C=乏力 P=69:71 T=symptom A=present
C=腹胀 P=72:74 T=symptom A=present
C=腰痛 P=78:80 T=symptom A=present
C=发热 P=81:83 T=symptom A=present
C=乏力 P=103:105 T=symptom A=present
C=腹胀 P=106:108 T=symptom A=present
C=食欲减退 P=109:113 T=symptom A=present
C=低热 P=114:116 T=symptom A=present
C=恶心 P=117:119 T=symptom A=present
C=呕吐 P=120:122 T=symptom A=present
C=厌油腻 P=123:126 T=symptom A=present
C=腹胀 P=127:129 T=symptom A=present
C=腹泻 P=130:132 T=symptom A=present
C=B超检查 P=140:144 T=test
C=肝硬化 P=146:149 T=disease A=present
C=鼻衄 P=151:153 T=symptom A=absent
C=齿龈出血 P=154:158 T=symptom A=absent
C=皮肤瘀点 P=159:163 T=symptom A=absent
C=瘀斑 P=164:166 T=symptom A=absent
C=月经过多 P=168:172 T=symptom A=absent
C=闭经 P=173:175 T=symptom A=absent
C=乳房发育疼痛 P=176:182 T=symptom A=absent
C=肝硬化 P=186:189 T=disease A=present
C=肝功能失代偿期 P=190:197 T=disease A=present
C=腰痛 P=210:212 T=symptom A=present
C=发热 P=213:215 T=symptom A=present
C=血培养 P=223:226 T=test
C=大肠埃希菌 P=228:233 T=disease A=present
C=双下肢浮肿 P=242:247 T=symptom A=present
C=左下肢较重 P=248:253 T=symptom A=present
C=腹胀 P=254:256 T=symptom A=present
C=全身多发瘀斑 P=263:269 T=symptom A=present
C=腰背部水肿 P=270:275 T=symptom A=present
C=咳嗽 P=277:279 T=symptom A=present
C=咳痰 P=280:282 T=symptom A=present
C=心悸 P=283:285 T=symptom A=present
C=呼吸急促 P=286:290 T=symptom A=present
C=怕珠沙星 P=293:297 T=treatment A=history
C=阿莫西林 P=298:302 T=treatment A=history
C=保肝 P=306:308 T=treatment A=history
C=利尿 P=309:311 T=treatment A=history
C=对症支持治疗 P=311:317 T=treatment A=present
C=肝炎 P=344:346 T=disease A=absent
C=结核 P=347:349 T=disease A=absent
C=疟疾 P=350:352 T=disease A=absent
C=血吸虫病史 P=353:358 T=disease A=absent
C=高血压 P=361:364 T=disease A=absent
C=心脏病史 P=365:369 T=disease A=absent
C=脑血管疾病 P=372:377 T=disease A=absent
C=精神疾病史 P=378:383 T=disease A=absent
C=糖尿病史 P=384:388 T=disease A=present
C=胰岛素 P=396:399 T=treatment A=history
C=输血史 P=432:435 T=disease A=absent
C=药物过敏史 P=441:446 T=disease A=absent
C=血培养 P=498:501 T=test
C=大肠埃希菌 P=502:507 T=disease A=present
C=B超 P=527:529 T=test
C=腰椎MR P=559:563 T=test
C=椎间盘膨出 P=569:574 T=symptom A=present
C=腰椎退行性变 P=575:581 T=symptom A=present
C=头颅MR P=599:603 T=test
C=两侧额叶皮层下缺血灶 P=606:616 T=symptom A=present
C=颅脑MRA P=618:623 T=test
C=护理常规 P=669:673 T=treatment A=present
C=I级护理 P=674:678 T=treatment A=present
C=利尿 P=730:732 T=treatment A=present
C=螺内酯 P=733:736 T=treatment A=present
C=呋塞米 P=737:740 T=treatment A=present
C=托拉塞米 P=741:745 T=treatment A=present
C=保肝 P=747:749 T=treatment A=present
C=门冬氨酸鸟氨酸 P=750:757 T=treatment A=present
C=美罗培南 P=773:777 T=treatment A=present
C=补充电解质 P=781:786 T=treatment A=present
C=营养支持 P=787:791 T=treatment A=present
