# Supplementary material for: Relation Extraction Based on Fusion Dependency Parsing from Chinese EMRs
Source: Hindawi journal article supplement (doi:10.1155/2020/8658040), 2020-06-08
Supplement: f1 [file 8658040.f1.zip › progress/progressEntity/progress7.xml.ent]

C=上腹部隐痛 P=72:77 T=symptom A=present
C=上腹部隐痛 P=97:102 T=symptom A=present
C=夜间痛 P=125:128 T=symptom A=present
C=反酸 P=130:132 T=symptom A=absent
C=烧心 P=133:135 T=symptom A=absent
C=腹胀 P=136:138 T=symptom A=absent
C=腹泻 P=139:141 T=symptom A=absent
C=恶心 P=142:144 T=symptom A=absent
C=呕吐 P=145:147 T=symptom A=absent
C=食欲减退 P=148:152 T=symptom A=absent
C=体重减轻 P=153:157 T=symptom A=absent
C=消瘦 P=158:160 T=symptom A=absent
C=乏力 P=161:163 T=symptom A=absent
C=面色苍白 P=164:168 T=symptom A=absent
C=物发冷 P=169:172 T=symptom A=present
C=寒战 P=173:175 T=symptom A=present
C=发热 P=176:178 T=symptom A=present
C=皮肤巩膜黄染 P=179:185 T=symptom A=present
C=胃镜 P=199:201 T=test
C=胃多发性溃疡 P=203:209 T=disease A=present
C=慢性胃炎 P=210:214 T=disease A=present
C=十二指肠球炎 P=215:221 T=disease A=present
C=兰索拉唑 P=224:228 T=treatment A=history
C=药物治疗 P=229:233 T=treatment A=history
C=腹胀 P=249:251 T=symptom A=absent
C=恶心 P=252:254 T=symptom A=absent
C=呕吐 P=255:257 T=symptom A=absent
C=呕吐宿食 P=258:262 T=symptom A=absent
C=呕血 P=263:265 T=symptom A=absent
C=排黑粪 P=266:269 T=symptom A=absent
C=胃镜 P=276:278 T=test
C=糜烂性胃炎 P=280:285 T=disease A=present
C=胃多发性息肉 P=286:292 T=disease A=present
C=十二指肠球部溃疡 P=293:301 T=disease A=present
C=十二指肠溃疡 P=313:319 T=disease A=present
C=肝炎 P=333:335 T=disease A=absent
C=结核 P=336:338 T=disease A=absent
C=疟疾 P=339:341 T=disease A=absent
C=血吸虫病史 P=342:347 T=disease A=absent
C=高血压 P=350:353 T=disease A=absent
C=心脏病史 P=354:358 T=disease A=absent
C=糖尿病 P=361:364 T=disease A=absent
C=脑血管疾病 P=365:370 T=disease A=absent
C=精神疾病史 P=371:376 T=disease A=absent
C=输血史 P=382:385 T=disease A=absent
C=鼻衄 P=389:391 T=symptom A=present
C=鼻骨部分切除术 P=392:399 T=treatment A=history
C=药物过敏史 P=405:410 T=disease A=absent
C=胃镜 P=462:464 T=test
C=胃多发性溃疡 P=465:471 T=disease A=present
C=慢性胃炎 P=472:476 T=disease A=present
C=十二指肠球炎 P=477:483 T=disease A=present
C=胃镜 P=501:503 T=test
C=糜烂性胃炎 P=504:509 T=disease A=present
C=胃多发性息肉 P=510:516 T=disease A=present
C=十二指肠球部溃疡 P=517:525 T=disease A=present
C=护理常规 P=565:569 T=treatment A=present
C=II级护理 P=570:575 T=treatment A=present
C=对症治疗 P=621:625 T=treatment A=present
C=抑酸或抗酸药 P=626:632 T=treatment A=present
C=促胃肠动力药 P=633:639 T=treatment A=present
C=胃黏膜保护药 P=640:646 T=treatment A=present
