# Supplementary material for: Relation Extraction Based on Fusion Dependency Parsing from Chinese EMRs
Source: Hindawi journal article supplement (doi:10.1155/2020/8658040), 2020-06-08
Supplement: f1 [file 8658040.f1.zip › progress/progressEntity/progress8.xml.ent]

C=下腹隐痛 P=69:73 T=symptom A=present
C=下腹隐痛 P=95:99 T=symptom A=present
C=尿频 P=101:103 T=symptom A=present
C=恶心 P=105:107 T=symptom A=absent
C=呕吐 P=108:110 T=symptom A=absent
C=咳嗽 P=112:114 T=symptom A=present
C=咳痰 P=115:117 T=symptom A=absent
C=胸闷 P=119:121 T=symptom A=absent
C=心悸 P=122:124 T=symptom A=absent
C=肛门坠胀感 P=126:131 T=symptom A=absent
C=发热 P=133:135 T=symptom A=absent
C=腹泻 P=137:139 T=symptom A=absent
C=黄疸 P=140:142 T=symptom A=absent
C=妇科查体 P=154:158 T=test
C=盆腔巨大包块 P=160:166 T=symptom A=present
C=盆腔肿物 P=177:181 T=disease A=present
C=尿频 P=204:206 T=symptom A=present
C=尿痛 P=208:210 T=symptom A=absent
C=排尿困难 P=211:215 T=symptom A=absent
C=高血压 P=246:249 T=disease A=absent
C=心脏病史 P=250:254 T=disease A=absent
C=糖尿病 P=257:260 T=disease A=absent
C=脑血管疾病 P=261:266 T=disease A=absent
C=精神疾病史 P=267:272 T=disease A=absent
C=肝炎 P=276:278 T=disease A=absent
C=结核 P=279:281 T=disease A=absent
C=疟疾 P=282:284 T=disease A=absent
C=血吸虫病史 P=285:290 T=disease A=absent
C=阑尾切除术 P=305:310 T=treatment A=history
C=胆囊切除术 P=317:322 T=treatment A=history
C=右腓骨骨折 P=328:333 T=disease A=present
C=药物过敏史 P=347:352 T=disease A=absent
C=盆腔肿物 P=383:387 T=disease A=possible
C=宫内节育器 P=389:394 T=disease A=possible
C=取环 P=446:448 T=treatment A=present
