# Supplementary material for: Relation Extraction Based on Fusion Dependency Parsing from Chinese EMRs
Source: Hindawi journal article supplement (doi:10.1155/2020/8658040), 2020-06-08
Supplement: f1 [file 8658040.f1.zip › progress/progressEntity/progress9.xml.ent]

C=经皮肾镜碎石取石术 P=68:77 T=treatment A=history
C=双侧腰部酸痛 P=106:112 T=symptom A=present
C=尿频 P=117:119 T=symptom A=absent
C=尿急 P=119:121 T=symptom A=absent
C=尿痛 P=121:123 T=symptom A=absent
C=双肾鹿角形结石 P=134:141 T=disease A=present
C=右侧经皮肾镜碎石取石术 P=152:163 T=treatment A=history
C=左侧经皮肾镜碎石取石术 P=172:183 T=treatment A=history
C=肌酐升高 P=215:219 T=symptom A=present
C=B超 P=220:222 T=test
C=右肾结石 P=224:228 T=disease A=present
C=右肾结石 P=240:244 T=disease A=present
C=双肾积水 P=245:249 T=disease A=present
C=重度肾性贫血 P=250:256 T=disease A=present
C=畏寒 P=269:271 T=symptom A=absent
C=发热 P=272:274 T=symptom A=absent
C=右肾结石 P=320:324 T=disease A=possible
C=双肾积水 P=326:330 T=disease A=possible
C=重度肾性贫血 P=332:338 T=disease A=possible
C=对症治疗 P=370:374 T=treatment A=present
C=手术治疗 P=385:389 T=treatment A=present
C=输血 P=393:395 T=treatment A=present
