# Supplementary material for: Relation Extraction Based on Fusion Dependency Parsing from Chinese EMRs
Source: Hindawi journal article supplement (doi:10.1155/2020/8658040), 2020-06-08
Supplement: f1 [file 8658040.f1.zip › progress/progressEntity/progress10.xml.ent]

C=上腹部疼痛 P=72:77 T=symptom A=present
C=上腹部疼痛 P=109:114 T=symptom A=present
C=上腹饱胀 P=131:135 T=symptom A=absent
C=呃逆 P=136:138 T=symptom A=absent
C=纳差 P=139:141 T=symptom A=absent
C=上腹部疼痛 P=173:178 T=symptom A=present
C=腰背部放散痛 P=187:193 T=symptom A=absent
C=皮肤巩膜黄染 P=194:200 T=symptom A=absent
C=恶心 P=201:203 T=symptom A=absent
C=呕吐 P=204:206 T=symptom A=absent
C=寒战 P=207:209 T=symptom A=absent
C=高热 P=210:212 T=symptom A=absent
C=腹泻 P=213:215 T=symptom A=absent
C=血便 P=216:218 T=symptom A=absent
C=咳嗽 P=220:222 T=symptom A=absent
C=咳痰 P=223:225 T=symptom A=absent
C=胸闷 P=227:229 T=symptom A=absent
C=气短 P=230:232 T=symptom A=absent
C=尿频 P=233:235 T=symptom A=absent
C=尿急 P=236:238 T=symptom A=absent
C=尿痛 P=239:241 T=symptom A=absent
C=血尿 P=242:244 T=symptom A=absent
C=彩超检查 P=253:257 T=test
C=胆囊炎 P=262:265 T=disease A=present
C=胆囊颈部结石 P=266:272 T=disease A=present
C=胆汁淤积 P=273:277 T=disease A=present
C=左肾结石 P=280:284 T=disease A=present
C=结石性胆囊炎 P=310:316 T=disease A=present
C=彩超 P=378:380 T=test
C=胆囊炎 P=381:384 T=disease A=present
C=胆囊颈部结石 P=385:391 T=disease A=present
C=胆汁淤积 P=392:396 T=disease A=present
C=左肾结石 P=399:403 T=disease A=present
C=胆囊结石伴胆囊炎 P=422:430 T=disease A=possible
C=手术治疗 P=460:464 T=treatment A=present
