# Supplementary material for: Relation Extraction Based on Fusion Dependency Parsing from Chinese EMRs
Source: Hindawi journal article supplement (doi:10.1155/2020/8658040), 2020-06-08
Supplement: f1 [file 8658040.f1.zip › progress/progressEntity/progress11.xml.ent]

C=胸闷 P=74:76 T=symptom A=present
C=胸痛 P=76:78 T=symptom A=present
C=胸闷 P=107:109 T=symptom A=present
C=胸痛 P=109:111 T=symptom A=present
C=放射痛 P=123:126 T=symptom A=absent
C=头晕 P=128:130 T=symptom A=absent
C=头痛 P=130:132 T=symptom A=present
C=意识障碍 P=134:138 T=symptom A=absent
C=心悸 P=140:142 T=symptom A=absent
C=冷汗 P=142:144 T=symptom A=absent
C=恶心 P=146:148 T=symptom A=absent
C=呕吐 P=148:150 T=symptom A=absent
C=咳嗽 P=152:154 T=symptom A=absent
C=咳痰 P=154:156 T=symptom A=absent
C=腹痛 P=158:160 T=symptom A=absent
C=腹泻 P=160:162 T=symptom A=absent
C=心电图 P=168:171 T=test
C=室上性心动过速 P=174:181 T=disease A=present
C=射频消融术 P=201:206 T=treatment A=history
C=胸闷 P=219:221 T=symptom A=present
C=胸痛 P=221:223 T=symptom A=present
C=心电图 P=230:233 T=test
C=室上性心动过速 P=236:243 T=disease A=present
C=房颤 P=244:246 T=disease A=present
C=美托洛尔缓释片 P=251:258 T=treatment A=history
C=手术治疗 P=267:271 T=treatment A=present
C=心律失常 P=276:280 T=disease A=present
C=高血压病史 P=342:347 T=disease A=present
C=血压 P=350:352 T=test
C=氨氯地平 P=368:372 T=treatment A=present
C=肝炎 P=387:389 T=disease A=absent
C=结核 P=390:392 T=disease A=absent
C=疟疾 P=393:395 T=disease A=absent
C=血吸虫病史 P=396:401 T=disease A=absent
C=心脏病史 P=404:408 T=disease A=absent
C=糖尿病 P=411:414 T=disease A=absent
C=脑血管疾病 P=415:420 T=disease A=absent
C=精神疾病史 P=421:426 T=disease A=absent
C=右下肢静脉曲张 P=430:437 T=symptom A=present
C=手术治疗 P=438:442 T=treatment A=history
C=疝气 P=445:447 T=disease A=present
C=手术治疗 P=448:452 T=treatment A=history
C=染发剂过敏 P=454:459 T=disease A=present
C=心律失常 P=487:491 T=disease A=possible
C=阵发性室上性心动过速 P=492:502 T=disease A=possible
C=阵发性心房纤颤 P=503:510 T=disease A=possible
C=心功能Ⅱ级 P=511:516 T=disease A=possible
C=高血压病 P=526:530 T=disease A=possible
C=护理常规 P=557:561 T=treatment A=present
C=II级护理 P=562:567 T=treatment A=present
C=低盐低脂饮食 P=568:574 T=treatment A=present
C=控制心室率 P=644:649 T=treatment A=present
C=美托洛尔缓释片 P=650:657 T=treatment A=present
C=利尿 P=659:661 T=treatment A=present
C=呋塞米 P=668:671 T=treatment A=present
C=螺内酯 P=672:675 T=treatment A=present
C=营养心肌 P=677:681 T=treatment A=present
C=改善循环 P=682:686 T=treatment A=present
C=辅酶Q10 P=687:692 T=treatment A=present
C=长春西汀 P=693:697 T=treatment A=present
C=左卡尼汀 P=698:702 T=treatment A=present
C=环磷腺苷葡胺 P=703:709 T=treatment A=present
C=抑酸护胃 P=711:715 T=treatment A=present
C=兰索拉唑 P=716:720 T=treatment A=present
