# Supplementary material for: Relation Extraction Based on Fusion Dependency Parsing from Chinese EMRs
Source: Hindawi journal article supplement (doi:10.1155/2020/8658040), 2020-06-08
Supplement: f1 [file 8658040.f1.zip › progress/progressEntity/progress12.xml.ent]

C=说话变慢 P=69:73 T=symptom A=present
C=行走困难 P=74:78 T=symptom A=present
C=说话变慢 P=121:125 T=symptom A=present
C=行走困难 P=126:130 T=symptom A=present
C=头痛 P=146:148 T=symptom A=absent
C=呕吐 P=149:151 T=symptom A=absent
C=意识障碍 P=152:156 T=symptom A=absent
C=说话变慢 P=180:184 T=symptom A=present
C=右下肢走路时疼痛 P=188:196 T=symptom A=present
C=放射痛 P=197:200 T=symptom A=present
C=右脚不能踏地 P=201:207 T=symptom A=present
C=右下肢外侧绷紧感 P=208:216 T=symptom A=present
C=头颅MRI P=244:249 T=test
C=脑血管病 P=288:292 T=disease A=present
C=高血压 P=297:300 T=disease A=present
C=护理常规 P=367:371 T=treatment A=present
C=抗血小板聚集治疗 P=397:405 T=treatment A=present
C=氯吡格雷 P=406:410 T=treatment A=present
C=奥扎格雷 P=411:415 T=treatment A=present
C=改善微循环 P=420:425 T=treatment A=present
C=改善脑代谢 P=426:431 T=treatment A=present
C=丹参酮 P=432:435 T=treatment A=present
C=桂哌奇特 P=436:440 T=treatment A=present
