# Supplementary material for: Relation Extraction Based on Fusion Dependency Parsing from Chinese EMRs
Source: Hindawi journal article supplement (doi:10.1155/2020/8658040), 2020-06-08
Supplement: f1 [file 8658040.f1.zip › progress/progressEntity/progress13.xml.ent]

C=胸闷 P=70:72 T=symptom A=present
C=气促 P=93:95 T=symptom A=present
C=心悸 P=97:99 T=symptom A=absent
C=胸痛 P=100:102 T=symptom A=present
C=心超 P=133:135 T=test
C=左房增大 P=137:141 T=symptom A=present
C=室间隔肥厚 P=142:147 T=symptom A=present
C=心电图检查 P=156:161 T=test
C=左室高电压 P=163:168 T=symptom A=present
C=左房肥大 P=171:175 T=symptom A=present
C=ST段改变 P=176:181 T=symptom A=present
C=肥厚型非梗阻性心肌病 P=218:228 T=disease A=present
C=发热 P=267:269 T=symptom A=absent
C=胸痛 P=270:272 T=symptom A=absent
C=下肢浮肿 P=274:278 T=symptom A=absent
C=心超 P=349:351 T=test
C=左房明显增大 P=352:358 T=symptom A=present
C=室间隔增厚 P=359:364 T=symptom A=present
C=轻度二尖瓣反流 P=365:372 T=symptom A=present
C=升主动脉增宽 P=373:379 T=symptom A=present
C=轻度肺动脉高压 P=380:387 T=symptom A=present
C=左室舒张功能减退 P=388:396 T=symptom A=present
C=心肺运动检查 P=398:404 T=test
C=运动耐受功能显著减退 P=405:415 T=symptom A=present
C=通气功能减退 P=416:422 T=symptom A=present
C=Holter P=424:430 T=test
C=心率 P=449:451 T=test
C=窦律及房性心动过速 P=459:468 T=symptom A=present
C=心率 P=471:473 T=test
C=窦缓 P=480:482 T=symptom A=present
C=心率 P=485:487 T=test
C=房早四联律 P=502:507 T=symptom A=present
C=SNRT P=555:559 T=test
C=肥厚型非梗阻性心肌病 P=706:716 T=disease A=possible
C=心律失常 P=717:721 T=disease A=possible
C=频发房早 P=723:727 T=disease A=possible
C=心功能Ⅱ P=728:732 T=disease A=possible
C=高血压病 P=744:748 T=disease A=possible
C=慢性支气管炎 P=756:762 T=disease A=possible
C=护理常规 P=783:787 T=treatment A=present
C=二级护理 P=788:792 T=treatment A=present
C=抗聚 P=839:841 T=treatment A=present
C=阿司匹林 P=842:846 T=treatment A=present
C=改善心室重构 P=848:854 T=treatment A=present
C=美托洛尔 P=855:859 T=treatment A=present
C=稳定心率 P=861:865 T=treatment A=present
C=美西律 P=866:869 T=treatment A=present
C=利尿 P=871:873 T=treatment A=present
C=托拉塞米 P=874:878 T=treatment A=present
C=改善循环 P=880:884 T=treatment A=present
