# Supplementary material for: Relation Extraction Based on Fusion Dependency Parsing from Chinese EMRs
Source: Hindawi journal article supplement (doi:10.1155/2020/8658040), 2020-06-08
Supplement: f1 [file 8658040.f1.zip › progress/progressEntity/progress14.xml.ent]

C=头晕 P=73:75 T=symptom A=present
C=咳嗽 P=80:82 T=symptom A=present
C=头晕 P=102:104 T=symptom A=present
C=血压偏高 P=108:112 T=symptom A=present
C=恶心 P=128:130 T=symptom A=absent
C=呕吐 P=131:133 T=symptom A=absent
C=黑朦 P=135:137 T=symptom A=absent
C=意识丧失 P=138:142 T=symptom A=absent
C=氯沙坦钾 P=151:155 T=treatment A=history
C=头晕 P=171:173 T=symptom A=present
C=咳嗽 P=206:208 T=symptom A=present
C=白痰 P=211:213 T=symptom A=occasional
C=气促 P=215:217 T=symptom A=absent
C=呕吐 P=218:220 T=symptom A=absent
C=反酸 P=221:223 T=symptom A=absent
C=胸闷 P=224:226 T=symptom A=absent
C=胸痛 P=227:229 T=symptom A=absent
C=黑矇 P=230:232 T=symptom A=absent
C=意识丧失 P=233:237 T=symptom A=absent
C=高血压 P=250:253 T=disease A=present
C=肺部感染 P=254:258 T=disease A=present
C=精神状态欠佳 P=275:281 T=symptom A=present
C=肝炎 P=319:321 T=disease A=absent
C=结核 P=322:324 T=disease A=absent
C=疟疾 P=325:327 T=disease A=absent
C=血吸虫病史 P=328:333 T=disease A=absent
C=腔梗 P=339:341 T=disease A=absent
C=肢体活动不利 P=345:351 T=symptom A=absent
C=心脏病史 P=355:359 T=disease A=absent
C=慢性胃窦炎史 P=361:367 T=disease A=present
C=糖尿病 P=374:377 T=disease A=absent
C=脑血管疾病 P=378:383 T=disease A=absent
C=精神疾病史 P=384:389 T=disease A=absent
C=腹股沟斜疝手术 P=395:402 T=treatment A=history
C=肋骨骨折 P=421:425 T=disease A=present
C=保守治疗 P=427:431 T=treatment A=history
C=输血史 P=445:448 T=disease A=absent
C=食物过敏史 P=451:456 T=disease A=absent
C=呋喃唑酮 P=459:463 T=treatment A=history
C=药物过敏史 P=464:469 T=disease A=present
C=高血压病 P=497:501 T=disease A=possible
C=陈旧性脑梗塞 P=507:513 T=disease A=possible
C=肺部感染 P=515:519 T=disease A=possible
C=护理常规 P=540:544 T=treatment A=present
C=II级护理 P=545:550 T=treatment A=present
C=低盐低脂饮食 P=551:557 T=treatment A=present
C=头孢呋辛 P=568:572 T=treatment A=present
C=氨溴索 P=576:579 T=treatment A=present
