# Supplementary material for: Relation Extraction Based on Fusion Dependency Parsing from Chinese EMRs
Source: Hindawi journal article supplement (doi:10.1155/2020/8658040), 2020-06-08
Supplement: f1 [file 8658040.f1.zip › progress/progressEntity/progress15.xml.ent]

C=腹膜后多发淋巴结肿大 P=71:81 T=symptom A=present
C=发热 P=113:115 T=symptom A=present
C=咽痛 P=127:129 T=symptom A=present
C=上呼吸道感染 P=142:148 T=disease A=hypothetical
C=阿奇霉素 P=157:161 T=treatment A=history
C=盐酸莫西沙星 P=166:172 T=treatment A=history
C=体温反复 P=184:188 T=symptom A=present
C=肝左叶外侧段被膜下等多处淋巴结肿大 P=221:238 T=symptom A=present
C=腹膜后淋巴结穿刺病理 P=239:249 T=test
C=淋巴滤泡萎缩 P=264:270 T=symptom A=present
C=结构模糊 P=271:275 T=symptom A=present
C=单核样细胞浸润 P=294:301 T=disease A=present
C=免疫组化染色 P=314:320 T=test
C=CD3 P=323:326 T=test
C=CD45RO P=327:333 T=test
C=CD20 P=342:346 T=test
C=CD30 P=355:359 T=test
C=Ki-67 P=366:371 T=test
C=S-100 P=377:382 T=test
C=CD21 P=390:394 T=test
C=CD23 P=399:403 T=test
C=CD68 P=408:412 T=test
C=CD15 P=420:424 T=test
C=EMA P=428:431 T=test
C=CK P=435:437 T=test
C=肿瘤 P=456:458 T=disease A=hypothetical
C=右上腹不适 P=486:491 T=symptom A=present
C=CT检查 P=510:514 T=test
C=腹膜后多发肿大淋巴结 P=536:546 T=symptom A=present
C=胰腺分界不清 P=548:554 T=symptom A=present
C=MRI增强检查 P=564:571 T=test
C=淋巴结转移 P=588:593 T=symptom A=present
C=肝脏多发转移 P=594:600 T=symptom A=present
C=胃窦部FDG摄取增高 P=604:614 T=symptom A=present
C=上腹部增强CT P=616:623 T=test
C=增强MRI P=636:641 T=test
C=肝门部多发占位 P=659:666 T=symptom A=present
C=淋巴瘤 P=672:675 T=disease A=possible
C=转移瘤 P=676:679 T=disease A=possible
C=穿刺活检 P=712:716 T=test
C=淋巴组织增生性病变 P=717:726 T=disease A=hypothetical
C=免疫染色 P=765:769 T=test
C=T细胞肿瘤性病变 P=776:784 T=disease A=possible
C=外周T细胞淋巴瘤 P=785:793 T=disease A=possible
C=免疫组化 P=798:802 T=test
C=异型淋巴样细胞 P=817:824 T=test
C=散在细胞 P=876:880 T=test
C=小B细胞结节 P=887:893 T=test
C=外周T细胞淋巴瘤 P=910:918 T=disease A=present
C=化疗 P=945:947 T=treatment A=history
C=化疗 P=983:985 T=treatment A=history
C=外周T细胞淋巴瘤 P=1028:1036 T=disease A=possible
C=高血压病 P=1038:1042 T=disease A=possible
C=2型糖尿病 P=1051:1056 T=disease A=possible
C=护理常规 P=1077:1081 T=treatment A=present
C=II级护理 P=1082:1087 T=treatment A=present
C=化疗 P=1108:1110 T=treatment A=present
