# Supplementary material for: Relation Extraction Based on Fusion Dependency Parsing from Chinese EMRs
Source: Hindawi journal article supplement (doi:10.1155/2020/8658040), 2020-06-08
Supplement: f1 [file 8658040.f1.zip › progress/progressRelation/progress1.xml.rel]

E={心脏ECT【180-185】test;冠脉造影检查【186-192】test;}||R=TeAS||E={放射痛【131-134】symptom;闷痛【136-138】symptom;眩晕【158-160】symptom;晕厥【161-163】symptom;}
E={心电图检查【301-306】test;胸部CT【341-345】test;}||R=TeAS||E={胸痛【232-234】symptom;疼痛【244-246】symptom;胸痛【252-254】symptom;心悸不适【265-269】symptom;出汗【272-274】symptom;晕厥【276-278】symptom;黑朦【279-281】symptom;消瘦【283-285】symptom;食欲减退【286-290】symptom;纳差【291-293】symptom;}
E={心电图检查【301-306】test;}||R=TeRS||E={房早三联律【316-321】symptom;T波改变【322-326】symptom;}
E={胸部CT【341-345】test;}||R=TeRS||E={肝脏多发囊肿【352-358】symptom;}
E={胸部CT【341-345】test;}||R=TeRD||E={肝左叶斑点状钙化灶【359-368】disease;}
E={血常规【370-373】test;血糖【374-376】test;肾功能【377-380】test;电解质血钾【383-388】test;D-二聚体【398-403】test;脑钠肽前体【406-411】test;}||R=TeRD||E={心律失常【426-430】disease;}
E={心电图检查【522-527】test;}||R=TeRS||E={房早三联律【537-542】symptom;T波改变【543-547】symptom;}
E={胸部CT【562-566】test;}||R=TeRS||E={肝脏多发囊肿【573-579】symptom;}
E={胸部CT【562-566】test;}||R=TeRD||E={肝左叶斑点状钙化灶【580-589】disease;}
E={波依定【693-696】treatment;缬沙坦【697-700】treatment;}||R=TrID||E={肝炎【651-653】disease;结核【654-656】disease;疟疾【657-659】disease;血吸虫病史【660-665】disease;高血压病史【667-672】disease;}
