# Supplementary material for: Relation Extraction Based on Fusion Dependency Parsing from Chinese EMRs
Source: Hindawi journal article supplement (doi:10.1155/2020/8658040), 2020-06-08
Supplement: f1 [file 8658040.f1.zip › progress/progressRelation/progress2.xml.rel]

E={DVR术后【68-73】disease;}||R=DCS||E={胸闷【76-78】symptom;气促【79-81】symptom;}
E={主动脉瓣置换术【120-127】treatment;}||R=TrIS||E={二尖瓣脱垂【95-100】symptom;重度反流【101-105】symptom;主动脉瓣反流【106-112】symptom;}
E={华法林【141-144】treatment;}||R=TrAS||E={二尖瓣脱垂【95-100】symptom;重度反流【101-105】symptom;主动脉瓣反流【106-112】symptom;}
E={托拉塞米【214-218】treatment;}||R=TrWS||E={胸闷【159-161】symptom;气促【162-164】symptom;胸痛【183-185】symptom;放射痛【186-189】symptom;晕厥【191-193】symptom;黑朦【194-196】symptom;心慌【201-203】symptom;双下肢水肿【204-209】symptom;}
E={心超【236-238】test;}||R=TeRS||E={全心扩大【241-245】symptom;左室收缩功能重度减退【246-256】symptom;人工机械二尖瓣轻度瓣周反流【257-270】symptom;肺动脉高压【271-276】symptom;轻中度三尖瓣反流【277-285】symptom;}
E={心电图【287-290】test;}||R=TeRS||E={房扑【293-295】symptom;不规则房室传导【296-303】symptom;}
E={心电图【388-391】test;}||R=TeRS||E={房扑【392-394】symptom;不规则房室传导【395-402】symptom;}
