# Supplementary material for: Relation Extraction Based on Fusion Dependency Parsing from Chinese EMRs
Source: Hindawi journal article supplement (doi:10.1155/2020/8658040), 2020-06-08
Supplement: f1 [file 8658040.f1.zip › progress/progressRelation/progress3.xml.rel]

E={冠脉造影术【210-215】treatment;}||R=TrID||E={血管病变【217-221】disease;}
E={冠脉造影术【210-215】treatment;}||R=TrAS||E={胸闷【99-101】symptom;发热【121-123】symptom;胸痛【125-127】symptom;放射痛【128-131】symptom;心悸【133-135】symptom;大汗【136-138】symptom;黑朦【140-142】symptom;晕厥【143-145】symptom;咳嗽【147-149】symptom;咳痰【150-152】symptom;咯血【154-156】symptom;气促【158-160】symptom;呼吸困难【161-165】symptom;反酸【167-169】symptom;烧心【170-172】symptom;呼吸困难【180-184】symptom;颜面四肢水肿【193-199】symptom;}
E={血管病变【217-221】disease;}||R=SID||E={胸闷【99-101】symptom;发热【121-123】symptom;胸痛【125-127】symptom;放射痛【128-131】symptom;心悸【133-135】symptom;大汗【136-138】symptom;黑朦【140-142】symptom;晕厥【143-145】symptom;咳嗽【147-149】symptom;咳痰【150-152】symptom;咯血【154-156】symptom;气促【158-160】symptom;呼吸困难【161-165】symptom;反酸【167-169】symptom;烧心【170-172】symptom;呼吸困难【180-184】symptom;颜面四肢水肿【193-199】symptom;}
