# Supplementary material for: Relation Extraction Based on Fusion Dependency Parsing from Chinese EMRs
Source: Hindawi journal article supplement (doi:10.1155/2020/8658040), 2020-06-08
Supplement: f1 [file 8658040.f1.zip › progress/progressRelation/progress4.xml.rel]

E={手术治疗【132-136】treatment;抗感染【141-144】treatment;伽马刀治疗【169-174】treatment;}||R=TrAD||E={右侧颞顶枕胶质母细胞瘤【104-115】disease;}
E={手术治疗【299-303】treatment;}||R=TrAD||E={右侧颞顶枕胶质母细胞瘤【284-295】disease;}
E={头颅MRI【350-355】test;}||R=TeRD||E={右颞顶枕胶质母细胞瘤术后复发【356-370】disease;}
