# Supplementary material for: Relation Extraction Based on Fusion Dependency Parsing from Chinese EMRs
Source: Hindawi journal article supplement (doi:10.1155/2020/8658040), 2020-06-08
Supplement: f1 [file 8658040.f1.zip › progress/progressRelation/progress5.xml.rel]

E={小儿清热止咳颗粒【180-188】treatment;}||R=TrIS||E={咳嗽【155-157】symptom;有痰【160-162】symptom;发热【169-171】symptom;}
E={血常规【228-231】test;胸片【254-256】test;}||R=TeAS||E={发热【211-213】symptom;}
E={血常规【228-231】test;}||R=TeRS||E={白细胞升高【232-237】symptom;}
E={胸片【254-256】test;}||R=TeRD||E={支气管炎【286-290】disease;}
E={胸片【254-256】test;}||R=TeRD||E={两肺纹理增多【258-264】disease;右肺内带见斑片状密度增高影【268-281】disease;}
E={支气管炎【286-290】disease;}||R=SID||E={发热【211-213】symptom;白细胞升高【232-237】symptom;两肺纹理增多【258-264】symptom;右肺内带见斑片状密度增高影【268-281】symptom;}
E={胸片【416-418】test;}||R=TeRD||E={两肺纹理增多【419-425】disease;右肺内带见斑片状密度增高影【429-442】disease;}
