# Supplementary material for: Relation Extraction Based on Fusion Dependency Parsing from Chinese EMRs
Source: Hindawi journal article supplement (doi:10.1155/2020/8658040), 2020-06-08
Supplement: f1 [file 8658040.f1.zip › progress/progressRelation/progress6.xml.rel]

E={B超检查【140-144】test;}||R=TeAS||E={乏力【103-105】symptom;腹胀【106-108】symptom;食欲减退【109-113】symptom;低热【114-116】symptom;恶心【117-119】symptom;呕吐【120-122】symptom;厌油腻【123-126】symptom;腹胀【127-129】symptom;腹泻【130-132】symptom;鼻衄【151-153】symptom;齿龈出血【154-158】symptom;皮肤瘀点【159-163】symptom;瘀斑【164-166】symptom;月经过多【168-172】symptom;闭经【173-175】symptom;乳房发育疼痛【176-182】symptom;}
E={B超检查【140-144】test;}||R=TeRD||E={肝硬化【146-149】disease;}
E={肝硬化【146-149】disease;肝硬化【186-189】disease;肝功能失代偿期【190-197】disease;}||R=SID||E={乏力【103-105】symptom;腹胀【106-108】symptom;食欲减退【109-113】symptom;低热【114-116】symptom;恶心【117-119】symptom;呕吐【120-122】symptom;厌油腻【123-126】symptom;腹胀【127-129】symptom;腹泻【130-132】symptom;鼻衄【151-153】symptom;齿龈出血【154-158】symptom;皮肤瘀点【159-163】symptom;瘀斑【164-166】symptom;月经过多【168-172】symptom;闭经【173-175】symptom;乳房发育疼痛【176-182】symptom;}
E={血培养【223-226】test;}||R=TeAS||E={腰痛【210-212】symptom;发热【213-215】symptom;}
E={血培养【223-226】test;}||R=TeRD||E={大肠埃希菌【228-233】disease;}
E={大肠埃希菌【228-233】disease;}||R=SID||E={腰痛【210-212】symptom;发热【213-215】symptom;}
E={怕珠沙星【293-297】treatment;阿莫西林【298-302】treatment;保肝【306-308】treatment;利尿【309-311】treatment;对症支持治疗【311-317】treatment;}||R=TrWS||E={双下肢浮肿【242-247】symptom;左下肢较重【248-253】symptom;腹胀【254-256】symptom;全身多发瘀斑【263-269】symptom;腰背部水肿【270-275】symptom;咳嗽【277-279】symptom;咳痰【280-282】symptom;心悸【283-285】symptom;呼吸急促【286-290】symptom;}
E={胰岛素【396-399】treatment;}||R=TrWD||E={肝炎【344-346】disease;结核【347-349】disease;疟疾【350-352】disease;血吸虫病史【353-358】disease;高血压【361-364】disease;心脏病史【365-369】disease;脑血管疾病【372-377】disease;精神疾病史【378-383】disease;糖尿病史【384-388】disease;药物过敏史【441-446】disease;}
E={血培养【498-501】test;}||R=TeRD||E={大肠埃希菌【502-507】disease;}
E={腰椎MR【559-563】test;}||R=TeRS||E={椎间盘膨出【569-574】symptom;腰椎退行性变【575-581】symptom;}
E={头颅MR【599-603】test;}||R=TeRS||E={两侧额叶皮层下缺血灶【606-616】symptom;}
