# Supplementary material for: Relation Extraction Based on Fusion Dependency Parsing from Chinese EMRs
Source: Hindawi journal article supplement (doi:10.1155/2020/8658040), 2020-06-08
Supplement: f1 [file 8658040.f1.zip › progress/progressRelation/progress7.xml.rel]

E={胃镜【199-201】test;}||R=TeAS||E={腹胀【249-251】symptom;恶心【252-254】symptom;呕吐【255-257】symptom;呕吐宿食【258-262】symptom;呕血【263-265】symptom;排黑粪【266-269】symptom;}
E={胃镜【199-201】test;}||R=TeRD||E={胃多发性溃疡【203-209】disease;慢性胃炎【210-214】disease;十二指肠球炎【215-221】disease;}
E={胃多发性溃疡【203-209】disease;慢性胃炎【210-214】disease;十二指肠球炎【215-221】disease;}||R=DCS||E={腹胀【249-251】symptom;恶心【252-254】symptom;呕吐【255-257】symptom;呕吐宿食【258-262】symptom;呕血【263-265】symptom;排黑粪【266-269】symptom;}
E={兰索拉唑【224-228】treatment;}||R=TrAS||E={腹胀【249-251】symptom;恶心【252-254】symptom;呕吐【255-257】symptom;呕吐宿食【258-262】symptom;呕血【263-265】symptom;排黑粪【266-269】symptom;}
E={兰索拉唑【224-228】treatment;药物治疗【229-233】treatment;}||R=TrID||E={胃多发性溃疡【203-209】disease;慢性胃炎【210-214】disease;十二指肠球炎【215-221】disease;}
E={胃镜【276-278】test;}||R=TeRD||E={糜烂性胃炎【280-285】disease;胃多发性息肉【286-292】disease;十二指肠球部溃疡【293-301】disease;}
E={鼻骨部分切除术【392-399】treatment;}||R=TrAS||E={鼻衄【389-391】symptom;}
E={胃镜【462-464】test;}||R=TeRD||E={胃多发性溃疡【465-471】disease;慢性胃炎【472-476】disease;十二指肠球炎【477-483】disease;}
E={胃镜【501-503】test;}||R=TeRD||E={糜烂性胃炎【504-509】disease;胃多发性息肉【510-516】disease;十二指肠球部溃疡【517-525】disease;}
