# Supplementary material for: Relation Extraction Based on Fusion Dependency Parsing from Chinese EMRs
Source: Hindawi journal article supplement (doi:10.1155/2020/8658040), 2020-06-08
Supplement: f1 [file 8658040.f1.zip › progress/progressRelation/progress8.xml.rel]

E={妇科查体【154-158】test;}||R=TeAS||E={下腹隐痛【95-99】symptom;尿频【101-103】symptom;恶心【105-107】symptom;呕吐【108-110】symptom;咳嗽【112-114】symptom;咳痰【115-117】symptom;胸闷【119-121】symptom;心悸【122-124】symptom;肛门坠胀感【126-131】symptom;发热【133-135】symptom;腹泻【137-139】symptom;黄疸【140-142】symptom;}
E={妇科查体【154-158】test;}||R=TeRS||E={盆腔巨大包块【160-166】symptom;}
