# Supplementary material for: Relation Extraction Based on Fusion Dependency Parsing from Chinese EMRs
Source: Hindawi journal article supplement (doi:10.1155/2020/8658040), 2020-06-08
Supplement: f1 [file 8658040.f1.zip › progress/progressRelation/progress9.xml.rel]

E={双肾鹿角形结石【134-141】disease;}||R=SID||E={双侧腰部酸痛【106-112】symptom;尿频【117-119】symptom;尿急【119-121】symptom;尿痛【121-123】symptom;}
E={右侧经皮肾镜碎石取石术【152-163】treatment;左侧经皮肾镜碎石取石术【172-183】treatment;}||R=TrWS||E={双侧腰部酸痛【106-112】symptom;尿频【117-119】symptom;尿急【119-121】symptom;尿痛【121-123】symptom;}
E={B超【220-222】test;}||R=TeRD||E={右肾结石【224-228】disease;}
E={B超【220-222】test;}||R=TeAS||E={肌酐升高【215-219】symptom;}
E={右肾结石【224-228】disease;}||R=SID||E={肌酐升高【215-219】symptom;}
