# Supplementary material for: Relation Extraction Based on Fusion Dependency Parsing from Chinese EMRs
Source: Hindawi journal article supplement (doi:10.1155/2020/8658040), 2020-06-08
Supplement: f1 [file 8658040.f1.zip › progress/progressRelation/progress10.xml.rel]

E={彩超检查【253-257】test;}||R=TeAS||E={上腹部疼痛【173-178】symptom;腰背部放散痛【187-193】symptom;皮肤巩膜黄染【194-200】symptom;恶心【201-203】symptom;呕吐【204-206】symptom;寒战【207-209】symptom;高热【210-212】symptom;腹泻【213-215】symptom;血便【216-218】symptom;咳嗽【220-222】symptom;咳痰【223-225】symptom;胸闷【227-229】symptom;气短【230-232】symptom;尿频【233-235】symptom;尿急【236-238】symptom;尿痛【239-241】symptom;血尿【242-244】symptom;}
E={彩超检查【253-257】test;}||R=TeRD||E={胆囊炎【262-265】disease;胆囊颈部结石【266-272】disease;胆汁淤积【273-277】disease;左肾结石【280-284】disease;}
E={胆囊炎【262-265】disease;胆囊颈部结石【266-272】disease;胆汁淤积【273-277】disease;左肾结石【280-284】disease;}||R=SID||E={上腹部疼痛【173-178】symptom;腰背部放散痛【187-193】symptom;皮肤巩膜黄染【194-200】symptom;恶心【201-203】symptom;呕吐【204-206】symptom;寒战【207-209】symptom;高热【210-212】symptom;腹泻【213-215】symptom;血便【216-218】symptom;咳嗽【220-222】symptom;咳痰【223-225】symptom;胸闷【227-229】symptom;气短【230-232】symptom;尿频【233-235】symptom;尿急【236-238】symptom;尿痛【239-241】symptom;血尿【242-244】symptom;}
E={彩超【378-380】test;}||R=TeRD||E={胆囊炎【381-384】disease;胆囊颈部结石【385-391】disease;胆汁淤积【392-396】disease;左肾结石【399-403】disease;}
