# Supplementary material for: Relation Extraction Based on Fusion Dependency Parsing from Chinese EMRs
Source: Hindawi journal article supplement (doi:10.1155/2020/8658040), 2020-06-08
Supplement: f1 [file 8658040.f1.zip › progress/progressRelation/progress11.xml.rel]

E={心电图【168-171】test;}||R=TeAS||E={胸闷【107-109】symptom;胸痛【109-111】symptom;放射痛【123-126】symptom;头晕【128-130】symptom;头痛【130-132】symptom;意识障碍【134-138】symptom;心悸【140-142】symptom;冷汗【142-144】symptom;恶心【146-148】symptom;呕吐【148-150】symptom;咳嗽【152-154】symptom;咳痰【154-156】symptom;腹痛【158-160】symptom;腹泻【160-162】symptom;}
E={心电图【168-171】test;}||R=TeRD||E={室上性心动过速【174-181】disease;}
E={室上性心动过速【174-181】disease;}||R=SID||E={胸闷【107-109】symptom;胸痛【109-111】symptom;放射痛【123-126】symptom;头晕【128-130】symptom;头痛【130-132】symptom;意识障碍【134-138】symptom;心悸【140-142】symptom;冷汗【142-144】symptom;恶心【146-148】symptom;呕吐【148-150】symptom;咳嗽【152-154】symptom;咳痰【154-156】symptom;腹痛【158-160】symptom;腹泻【160-162】symptom;}
E={射频消融术【201-206】treatment;}||R=TrAS||E={胸闷【107-109】symptom;胸痛【109-111】symptom;放射痛【123-126】symptom;头晕【128-130】symptom;头痛【130-132】symptom;意识障碍【134-138】symptom;心悸【140-142】symptom;冷汗【142-144】symptom;恶心【146-148】symptom;呕吐【148-150】symptom;咳嗽【152-154】symptom;咳痰【154-156】symptom;腹痛【158-160】symptom;腹泻【160-162】symptom;}
E={射频消融术【201-206】treatment;}||R=TrAD||E={室上性心动过速【174-181】disease;}
E={心电图【230-233】test;}||R=TeAS||E={胸闷【219-221】symptom;胸痛【221-223】symptom;}
E={心电图【230-233】test;}||R=TeRD||E={室上性心动过速【236-243】disease;房颤【244-246】disease;}
E={室上性心动过速【236-243】disease;房颤【244-246】disease;}||R=SID||E={胸闷【219-221】symptom;胸痛【221-223】symptom;}
E={美托洛尔缓释片【251-258】treatment;}||R=TrAS||E={胸闷【219-221】symptom;胸痛【221-223】symptom;}
E={美托洛尔缓释片【251-258】treatment;}||R=TrAD||E={室上性心动过速【236-243】disease;房颤【244-246】disease;}
E={氨氯地平【368-372】treatment;}||R=TrAD||E={高血压病史【342-347】disease;}
E={手术治疗【438-442】treatment;}||R=TrAS||E={右下肢静脉曲张【430-437】symptom;}
E={手术治疗【448-452】treatment;}||R=TrAD||E={疝气【445-447】disease;}
