# Supplementary material for: Relation Extraction Based on Fusion Dependency Parsing from Chinese EMRs
Source: Hindawi journal article supplement (doi:10.1155/2020/8658040), 2020-06-08
Supplement: f1 [file 8658040.f1.zip › progress/progressRelation/progress13.xml.rel]

E={心超【133-135】test;}||R=TeRS||E={左房增大【137-141】symptom;室间隔肥厚【142-147】symptom;}
E={心电图检查【156-161】test;}||R=TeRS||E={左室高电压【163-168】symptom;左房肥大【171-175】symptom;ST段改变【176-181】symptom;}
E={心电图检查【156-161】test;}||R=TeRD||E={肥厚型非梗阻性心肌病【218-228】disease;}
E={肥厚型非梗阻性心肌病【218-228】disease;}||R=SID||E={左室高电压【163-168】symptom;左房肥大【171-175】symptom;ST段改变【176-181】symptom;}
E={心超【349-351】test;}||R=TeRS||E={左房明显增大【352-358】symptom;室间隔增厚【359-364】symptom;轻度二尖瓣反流【365-372】symptom;升主动脉增宽【373-379】symptom;轻度肺动脉高压【380-387】symptom;左室舒张功能减退【388-396】symptom;}
E={心肺运动检查【398-404】test;}||R=TeRS||E={运动耐受功能显著减退【405-415】symptom;通气功能减退【416-422】symptom;}
E={Holter【424-430】test;}||R=TeRS||E={窦律及房性心动过速【459-468】symptom;窦缓【480-482】symptom;房早四联律【502-507】symptom;}
E={心率【449-451】test;}||R=TeRS||E={窦律及房性心动过速【459-468】symptom;}
E={心率【471-473】test;}||R=TeRS||E={窦缓【480-482】symptom;}
