# Supplementary material for: Relation Extraction Based on Fusion Dependency Parsing from Chinese EMRs
Source: Hindawi journal article supplement (doi:10.1155/2020/8658040), 2020-06-08
Supplement: f1 [file 8658040.f1.zip › progress/progressRelation/progress14.xml.rel]

E={氯沙坦钾【151-155】treatment;}||R=TrIS||E={头晕【102-104】symptom;血压偏高【108-112】symptom;恶心【128-130】symptom;呕吐【131-133】symptom;黑朦【135-137】symptom;意识丧失【138-142】symptom;}
E={氯沙坦钾【151-155】treatment;}||R=TrIS||E={头晕【171-173】symptom;}
E={高血压【250-253】disease;肺部感染【254-258】disease;}||R=SID||E={咳嗽【206-208】symptom;白痰【211-213】symptom;气促【215-217】symptom;呕吐【218-220】symptom;反酸【221-223】symptom;胸闷【224-226】symptom;胸痛【227-229】symptom;黑矇【230-232】symptom;意识丧失【233-237】symptom;}
E={肝炎【319-321】disease;结核【322-324】disease;疟疾【325-327】disease;血吸虫病史【328-333】disease;腔梗【339-341】disease;}||R=DCS||E={肢体活动不利【345-351】symptom;}
E={腹股沟斜疝手术【395-402】treatment;}||R=TrAD||E={心脏病史【355-359】disease;慢性胃窦炎史【361-367】disease;糖尿病【374-377】disease;脑血管疾病【378-383】disease;精神疾病史【384-389】disease;}
E={保守治疗【427-431】treatment;}||R=TrID||E={肋骨骨折【421-425】disease;}
