# Supplementary material for: Relation Extraction Based on Fusion Dependency Parsing from Chinese EMRs
Source: Hindawi journal article supplement (doi:10.1155/2020/8658040), 2020-06-08
Supplement: f1 [file 8658040.f1.zip › progress/progressRelation/progress15.xml.rel]

E={上呼吸道感染【142-148】disease;}||R=SID||E={发热【113-115】symptom;咽痛【127-129】symptom;}
E={阿奇霉素【157-161】treatment;盐酸莫西沙星【166-172】treatment;}||R=TrWS||E={发热【113-115】symptom;咽痛【127-129】symptom;}
E={阿奇霉素【157-161】treatment;盐酸莫西沙星【166-172】treatment;}||R=TrWD||E={上呼吸道感染【142-148】disease;}
E={腹膜后淋巴结穿刺病理【239-249】test;}||R=TeRS||E={淋巴滤泡萎缩【264-270】symptom;结构模糊【271-275】symptom;}
E={CT检查【510-514】test;}||R=TeAS||E={右上腹不适【486-491】symptom;}
E={CT检查【510-514】test;}||R=TeRS||E={腹膜后多发肿大淋巴结【536-546】symptom;胰腺分界不清【548-554】symptom;}
E={MRI增强检查【564-571】test;}||R=TeAS||E={腹膜后多发肿大淋巴结【536-546】symptom;胰腺分界不清【548-554】symptom;}
E={上腹部增强CT【616-623】test;增强MRI【636-641】test;}||R=TeRS||E={肝门部多发占位【659-666】symptom;}
E={淋巴瘤【672-675】disease;转移瘤【676-679】disease;}||R=SID||E={肝门部多发占位【659-666】symptom;}
E={穿刺活检【712-716】test;}||R=TeRD||E={淋巴组织增生性病变【717-726】disease;}
E={免疫染色【765-769】test;}||R=TeRD||E={T细胞肿瘤性病变【776-784】disease;外周T细胞淋巴瘤【785-793】disease;}
E={化疗【945-947】treatment;化疗【983-985】treatment;}||R=TrAD||E={外周T细胞淋巴瘤【910-918】disease;}
