# Supplementary material for: Relation Extraction Based on Fusion Dependency Parsing from Chinese EMRs
Source: Hindawi journal article supplement (doi:10.1155/2020/8658040), 2020-06-08
Supplement: f1 [file 8658040.f1.zip › progress/text/progress101.xml]

<?xml version= "1.0" encoding="UTF-8"?>
<progress>
<病例特点>
（1）55岁男性患者，冠心病PCI术后1月
（2）患者于1月前无明显诱因感疼痛，持续不能缓解。
2015-06-23至我院住院，行冠脉造影检查显示：左前降支开口狭窄50％，中段狭窄70%，第一对角支近中段狭窄40-50%。
行PCI手术，术后恢复顺利。
近1月未出现胸闷，无心悸、呼吸困难、咳嗽、咯血、返酸、呕吐、大汗，无头晕、意识丧失。
（4）辅助检查：2015年08月01日；
心肌酶：无明显异常；本院
既往史：否认肝炎、结核、疟疾、血吸虫病史，有冠心病史，急性下壁心肌梗死，行PCI术，有高血压病史8年，最高收缩压大于200mmHg，长期药物控制血压。
有糖尿病病史8年，长期药物控制血糖。
有两次脑梗病史，具体不详。
否认食物、药物过敏史，预防接种史随当地。
</病例特点>
<初步诊断>
1.冠心病，急性下壁心肌梗死，PCI术后，心功能Ⅰ级（Killip)
2.高血压病3级，极高危组，脑梗后3.2型糖尿病
</初步诊断>
<诊疗计划>
1、心内科护理常规，II级护理，低盐低脂饮食；
2、完善相关检查（三大常规、血凝、肝肾功能、电解质、血糖、血脂、甲状腺功能、心电图、Holter、动态血压、心超、胸片、B超等）；
3.予以强心、扩冠、抗凝、营养心肌等治疗。
</诊疗计划>
</progress>
