# Supplementary material for: Relation Extraction Based on Fusion Dependency Parsing from Chinese EMRs
Source: Hindawi journal article supplement (doi:10.1155/2020/8658040), 2020-06-08
Supplement: f1 [file 8658040.f1.zip › progress/text/progress102.xml]

<?xml version= "1.0" encoding="UTF-8"?>
<progress>
<病例特点>
（1）42岁女性患者，左侧外阴肿痛4天，加重1天。
（2）患者4天前起无明显诱因下出现左侧外阴肿痛，未予特殊处理，1天前逐渐加重，局部触痛，行走不便，质软，无尿频、尿急、尿痛，排尿困难，无发热、腹痛、不规则阴道出血，今于于我院门诊就诊，诊断外阴脓肿，收入院手术治疗。
患者自发病来精神状态良好，体力情况良好，食欲食量良好，睡眠情况良好，体重无明显变化，大便正常，小便正常。
（3）既往史：平素体健。
否认高血压、心脏病史，否认糖尿病、脑血管疾病、精神疾病史。
否认肝炎、结核、疟疾、血吸虫病史。
预防接种史不详。
1995年，2001年行剖宫产术。
否认其他手术、外伤、输血史。
否认食物、药物过敏史。
（5）辅助检查：暂缺
</病例特点>
<初步诊断>
1.左侧小阴唇脓肿2.疤痕子宫
</初步诊断>
<诊疗计划>
完善术前检查及术前准备，嘱患者禁食水，今行手术治疗。
</诊疗计划>
</progress>
