# Supplementary material for: Relation Extraction Based on Fusion Dependency Parsing from Chinese EMRs
Source: Hindawi journal article supplement (doi:10.1155/2020/8658040), 2020-06-08
Supplement: f1 [file 8658040.f1.zip › progress/text/progress103.xml]

<?xml version= "1.0" encoding="UTF-8"?>
<progress>
<病例特点>
（1）29岁男性患者，以“腹胀伴双下肢水肿7天”入院。
（2）患者于7天前无明显诱因出现腹胀，伴右上腹钝痛，伴双下肢凹陷性水肿，伴乏力、食欲减退，伴皮肤、巩膜黄染，无腹泻、黑便，无寒战、高热，无恶心、呕吐、呕血，无胸闷、气短，今日来我院门诊就诊，查肝功能示：白蛋白26.8g/L，总胆红素：187umol/L，结合胆红素75.3umol/L，非结合胆红素57.9umol/L，丙氨酸氨基转移酶：69U/L，天冬氨酸氨基转移酶693U/L，乳酸脱氢酶：1700U/L。
血常规示：RBC：4.0*10^12/L，PLT：51*10^9/L，HB：144g/L，WBC：4.810^9/L。
为进一步治疗门诊以"肝硬化失代偿"收住入院。
患者发病来食欲食量较差，精神状态稍差，体力情况稍差，体重无明显变化，大便便秘，小便色黄。
（3）既往史：既往有“乙肝”病史15年，间断服用药物（具体用药及量不详）。
否认结核、疟疾、血吸虫病史，否认高血压、心脏病史，否认糖尿病、脑血管疾病、精神疾病史，有阑尾炎切除术病史，否认其他手术、外伤，曾因血小板低行输血治疗。
否认食物、药物过敏史，预防接种史随当地。
（5）辅助检查：2015年11月03日；
肝功能：白蛋白26.8g/L，总胆红素：187umol/L，结合胆红素75.3umol/L，非结合胆红素57.9umol/L，丙氨酸氨基转移酶：69U/L，天冬氨酸氨基转移酶：93U/L，乳酸脱氢酶：1700U/L。
血常规：RBC：4.0*10^12/L，PLT：51*10^9/L，HB：144g/L，WBC：4.810^9/L。
</病例特点>
<初步诊断>
肝硬化失代偿
</初步诊断>
<诊疗计划>
1、消化内科护理常规，I级护理，注意休息，加强营养。
2、吸氧，监测血压、心率等。
3、利尿（螺内酯、呋塞米、托拉塞米）、保肝、补充电解质、营养支持等治疗，注意维持水电解质平衡。
4、完善相关检查，明确肝硬化病因，进一步评估病情及预后：胃镜、呼吸试验、血常规、尿常规、粪常规+隐血、肝肾功能、电解质、肝炎免疫（乙肝、丙肝）、自身免疫、细胞免疫、CMV、EBV、消化道肿瘤指标、上腹部CT等。
5、向患者家属告知病情，目前考虑肝硬化失代偿期，可能合并有脾大、脾亢、食管静脉曲张，有发生上消化道大出血、感染性休克、电解质紊乱等可能，预后较差，家属表示理解。
</诊疗计划>
</progress>
