# Supplementary material for: Relation Extraction Based on Fusion Dependency Parsing from Chinese EMRs
Source: Hindawi journal article supplement (doi:10.1155/2020/8658040), 2020-06-08
Supplement: f1 [file 8658040.f1.zip › progress/text/progress104.xml]

<?xml version= "1.0" encoding="UTF-8"?>
<progress>
<病例特点>
女，71岁，因“反复头晕、胸闷、心慌、乏力等8年余，加重伴发作性左背痛1月”拟“虚劳”收治入院。
患者于05年9月因大便形态改变住我院普外科，肠镜活检病理“绒毛管状腺癌，局限性癌变”遂于9月16日行横结肠癌部分切除术，术后多次化疗，术后反复发生乏力、头晕、胸闷、排便异常等不适，有“脑供血不足，高血压，冠心病”等内科疾病。
2012年冠脉CTA：“1、左前降支近段管壁条片状混合型斑块形成，管腔中-重度狭窄；中段浅表型心肌桥形成，建议必要时DSA检查；2、左回旋支远段显示欠清。”患者术后长期坚持中医治疗，历年随访肠镜无复发。
近1月来患者胸闷、心慌发作频繁，有时左背痛，休息或活动时均有发生，随就诊我科寻求进一步诊治。
刻下患者发作性胸闷、心慌，有时伴有左背痛，耳鸣时作，偶有头晕，大便偏粘，余可。
既往史：有慢性胃炎病史约10年，曾有HP（＋）；
2005年起发现高血压偏高，血压最高160/100mmHg，长期服用氨氯地平片；
既往Holter提示房早、房速；
2012年10月冠脉CT提示“左前降支近段管壁条片状混合型斑块形成，管腔中-重度狭窄；中段浅表型心肌桥形成；左回旋支远段显示欠清”。
否认糖尿病、脑梗塞等其他内科疾病史。
1974年因胆结石于瑞金医院行全胆囊切除术；
否认其他手术外伤史；
否认输血史。
否认传染性疾病病史；
否认药物、食物过敏史；
预防接种史不详。
</病例特点>
<初步诊断>
虚劳
</初步诊断>
<诊疗计划>
1.中医科Ⅱ级护理；
2.予行必要辅检；
3.静点康艾扶正祛邪；
静点血栓通、口服银杏叶片活血通络；
注射胸腺肽α1调节免疫；
口服氨氯地平片、美托洛尔片控制血压、控制心室率；
口服单硝酸异山梨酯控释胶囊扩冠；
口服阿司匹林肠溶片抗血小板聚集。
</诊疗计划>
</progress>
