# Supplementary material for: Relation Extraction Based on Fusion Dependency Parsing from Chinese EMRs
Source: Hindawi journal article supplement (doi:10.1155/2020/8658040), 2020-06-08
Supplement: f1 [file 8658040.f1.zip › progress/text/progress105.xml]

<?xml version= "1.0" encoding="UTF-8"?>
<progress>
<病例特点>
（1）老年男性患者，诊断早幼粒细胞白血病11月，再治疗
（2）患者2014-9因腹痛就诊外院行相关检查，明确诊断为“急性白血病M3型”，予三氧化二砷化疗一个疗程后复查骨髓细胞学示完全缓解象（MRD3%），后继续予三氧化二砷治疗4个疗程+DA2次，并予腰穿+鞘内注射4次，期间复查均提示完全缓解。
末次化疗时间为2015-06，现患者为求进一步诊治入住我科。
病程中，患者饮食睡眠可，二便正常，体重无明显变化。
（4）辅助检查：暂缺。
</病例特点>
<初步诊断>
1.急性早幼粒细胞性白血病
</初步诊断>
<诊疗计划>
1.血液内科护理常规；
2.完善检查评估病情；
3.择期化疗。
</诊疗计划>
</progress>
