# Supplementary material for: Relation Extraction Based on Fusion Dependency Parsing from Chinese EMRs
Source: Hindawi journal article supplement (doi:10.1155/2020/8658040), 2020-06-08
Supplement: f1 [file 8658040.f1.zip › progress/text/progress106.xml]

<?xml version= "1.0" encoding="UTF-8"?>
<progress>
<病例特点>
（1）老年女性患者，反复发热3天，加重1天
（2）患者于3天前无明显诱因出现发热，体温未测，伴阵发寒颤，无鼻塞、流鼻涕，无咽痛、咽痒，无咳嗽、咳痰、咯血，无胸闷、胸痛、呼吸困难，无恶心、呕吐、腹痛、腹泻，无尿频、尿急、排尿痛，无盗汗、乏力，无头痛、头晕，无四肢关节酸痛，无近期拔牙或其他手术史，未予重视。
1天前感发热、寒颤症状较前加重，伴乏力、出冷汗，特来我院就诊，测体温38.4℃，验血示白细胞、降钙素原、CRP显著异常，胸部CT示可见双下肺炎症改变，考虑社区获得性肺炎可能，予头孢美唑抗感染、安乃近退热等对症处理后未见好转，于昨晚测体温为39.7℃，予左氧氟沙星加强抗感染、补液支持等对症处理后，今晨体温为37.1℃，为进一步明确诊断，特收入我科。
自发病以来精神状态尚可，食欲一般，进食可，睡眠可，体重无明显变化，大便干燥，小便正常。
体重无明显变化，无意识障碍。
（4）辅助检查：胸部CT放射学诊断：1、两肺散在炎症，请结合临床治疗后复查2、脂肪肝3、胆囊术后改变。
</病例特点>
<初步诊断>
1.发热待查：社区获得性肺炎可能
</初步诊断>
<诊疗计划>
1.吸氧；
控烟宣教；
2.经验性抗感染（目前“社区获得性肺炎”诊断明确，院外感染，结合病情考虑主要以肺炎链球菌、流感嗜血杆菌、卡他莫拉菌等感染为主，予以左氧氟沙星经验性抗感染治疗，待痰病原学检查回报后进一步调整治疗方案）；
3.止咳化痰、补液营养等相关对症支持治疗；
4.进一步完善相关检查（血常规、尿常规、大便常规；
肝肾功能、血糖、电解质、血沉、C反应蛋白（CRP）、病原学检查及药敏；
心电图、B超、心超等）。
5、该患者无明显感染表现，除考虑肺炎外，需警惕感染性心内膜炎、心肌炎等可能，予急抽血培养、心肌酶等，告知家属病情，注意检查结果回报，密观体温变化。
</诊疗计划>
</progress>
