# Supplementary material for: Relation Extraction Based on Fusion Dependency Parsing from Chinese EMRs
Source: Hindawi journal article supplement (doi:10.1155/2020/8658040), 2020-06-08
Supplement: f1 [file 8658040.f1.zip › progress/text/progress107.xml]

<?xml version= "1.0" encoding="UTF-8"?>
<progress>
<病例特点>
（1）67岁男性患者，双下肢乏力2月余。
（2）患者于入院前2月余无明显诱因下出现双下肢乏力，伴有纳差，于我院中医科就诊予中药调理，后患者双下肢乏力未有明显好转，于甘泉街道社区卫生服务中心查肝功能提示：ALT218U/L，AST127U/L，总胆红素24.6umol/l，肝炎相关指标、肿瘤指标均未见异常，自述考虑可能为服用“拜糖平”所致，故停药。
11-02号患者于泉街道社区卫生服务中心复查肝功能提示：ALT540U/L，AST420U/L，总胆红素39.9umol/l，故于华山医院就诊，考虑中药引起肝损，建议停用中药，1周后复查肝功能。
11-4号患者于我院就诊，复查肝功能提示：ALT436U/L，AST328U/L，总胆红素37.8umol/l，检查抗核抗体、自身免疫性肝炎相关指标、柯萨奇病毒抗体、巨细胞病毒抗体均阴性。
今日患者于我院复查肝功能提示：ALT214U/L，AST102U/L，总胆红素22.1umol/l。
现为进一步保肝治疗，门诊以“肝功能损害（药物性）”收住入院。
自述近1月来有咳嗽，无咳痰，患者发病来食欲食量较差，厌油腻，精神状态尚可，体力情况较差，近2-3月体重减轻10斤（有因糖尿病控制饮食及运动因素），大便正常，夜尿较多。
（3）既往史：发现血糖升高4-5年，曾服用“拜糖平”控制血糖，近1月因肝损停药，自行服用进口药物（具体不详）控制血糖，自述血糖控制可；
有高血压病史10年余，平素服用“施慧达”控制血压，自述血压控制可；
否认肝炎、结核、疟疾、血吸虫病史，否认心脏病史，否认脑血管疾病、精神疾病史，1年前曾行肺叶切除术，否认其他手术、外伤、输血史，否认食物、药物过敏史，预防接种史随当地。
（5）辅助检查：（2015年10月10日）生化：ALT218U/L，AST127U/L，总胆红素24.6umol/l，肾功能、电解质未见异常；
（2015年11月02日）生化：ALT540U/L，AST420U/L，总胆红素39.9umol/l，葡萄糖6.3mmol/l，三酰甘油2.46mmol/l。
（2015年11月04日）生化：ALT436U/L，AST328U/L，总胆红素37.8umol/l；
抗核抗体、自身免疫性肝炎相关指标、柯萨奇病毒抗体、巨细胞病毒抗体均阴性；
（2015年11月10日）肝功能：ALT214U/L，AST102U/L，总胆红素22.1umol/l；
</病例特点>
<初步诊断>
肝功能损害（药物性）
</初步诊断>
<诊疗计划>
1、消化科护理常规，II级护理；
2、完善相关检查，评估病情；
3、予保肝、营养支持治疗。
</诊疗计划>
</progress>
