# Supplementary material for: Relation Extraction Based on Fusion Dependency Parsing from Chinese EMRs
Source: Hindawi journal article supplement (doi:10.1155/2020/8658040), 2020-06-08
Supplement: f1 [file 8658040.f1.zip › progress/text/progress108.xml]

<?xml version= "1.0" encoding="UTF-8"?>
<progress>
<病例特点>
（1）男性患者，多尿、口干、多饮10余年，双下肢胀痛2年，加重1周。
（2）患者缘于10余年前无明显诱因下出现多尿、多饮，烦渴，饮水量增多，每日饮水量约5000ml，在当地医院就诊查空腹血糖最高26.5mmol/L，诊断为“2型糖尿病”，给予降糖药物治疗（先后口服二甲双胍、苯乙双胍、阿卡波糖等），未正规监测血糖。
11年前在上海瑞金医院行心脏支架置入术后开始给予胰岛素降血糖，起初予“诺和灵30R”降血糖，此后根据血糖调整降糖方案。
患者2年前无明显诱因出现双下肢胀痛不适，以活动后及夜间胀痛明显，难以入院，未系统诊疗。
1年前在我院门诊查感觉阈值测定提示双足部感觉神经轻度-中度病变。
1周前患者自觉双下肢水肿较前加重，未予药物治疗及特殊处理，自觉小便泡沫较前增多。
为求进一步诊治，门诊以“2型糖尿病”收住我科。
病程中患者神志清，精神、饮食、入眠可，有视物模糊，双下肢麻木不适，有尿频、尿不尽，大便正常。
体重变化不详。
（3）既往史：既往有高血压病史，最高160/98mmHg，平素口服“氯沙坦钾”降压，血压控制情况不详。
有高脂血症病史，患者现间断口服辛伐他汀胶囊。
有椎间盘突出病史。
去年开始出现听力下降，未予特殊诊治。
有2003年因冠心病在瑞金医院行支架植入病史，现一直口服硫酸氢氯吡格雷片、阿司匹林肠溶片口服。
1年前入院就诊考虑“慢性肾功能不全”，平素口服“胰激肽原酶肠溶片+百令胶囊”治疗。
否认肝炎、结核、疟疾病史，否认脑血管疾病、精神疾病史，否认外伤、输血史，有磺胺类药物过敏史，否认食物过敏史，预防接种史随当地。
（5）辅助检查
</病例特点>
<初步诊断>
2型糖尿病
</初步诊断>
<诊疗计划>
1、按内分泌科护理常规，二级护理，糖尿病饮食；
2、完善相关检查，进一步评估病情及有无相关并发症；
3、给予控制血糖、血压、抗聚、调脂、控制心室率，护肾、抗氧化等对症处理
4、请示上级医师指导进一步诊治。
</诊疗计划>
</progress>
