# Supplementary material for: Relation Extraction Based on Fusion Dependency Parsing from Chinese EMRs
Source: Hindawi journal article supplement (doi:10.1155/2020/8658040), 2020-06-08
Supplement: f1 [file 8658040.f1.zip › progress/text/progress109.xml]

<?xml version= "1.0" encoding="UTF-8"?>
<progress>
<病例特点>
（1）62岁男性患者，反复发作胸闷、头晕７月
（2）患者于７月前活动后感胸闷，持续约5分钟。
无放射痛，有胸闷、心悸，无呼吸困难、咳嗽、咯血、返酸、呕吐，伴头晕，无大汗、意识丧失，休息可缓解。
未予以重视，２月前胸闷，头晕加重，至当地医院就诊，行CTA检查提示：冠脉三支病变，管腔重度为主，左室体积增大，给予抗凝、抗栓、调节血脂、血压等处理后，症状缓解。
2015.3患者再次因胸闷收住我科，行CAG+PCI术示：左前降支近中段弥漫性狭窄80-85%，左回旋支未见明显狭窄，钝缘支近中段弥漫性狭窄70-85%，右冠全程弥漫性狭窄70-90%，左室后支开口70%狭窄。
给予右冠植入支架3枚（XIENCE2.75*38mm、XIENCE3.0*33mm、XIENCE3.5*33mm），术后患者症状好转出院，本次为评估病情及进一步检查，门诊以"冠心病、ＰＣＩ术后"收入我科。
发病以来食欲较好，精神休息较好，体力尚可，体重无明显变化，大便正常，小便正常。
（4）辅助检查：暂无
既往史：否认肝炎、结核、疟疾、血吸虫病史，否认高血压、心脏病史，否认糖尿病、脑血管疾病、精神疾病史，否认手术、外伤、输血史，否认食物、药物过敏史，预防接种史随当地。
</病例特点>
<初步诊断>
1.冠状动脉粥样硬化性心脏病PCI术后心功能2级（NYHA）
</初步诊断>
<诊疗计划>
1、心内科护理常规，II级护理，低盐低脂饮食；
2、完善相关检查（三大常规、血凝、肝肾功能、电解质、血糖、血脂、甲状腺功能、心电图、血栓弹力图等）；
3.给予患者抗血小板（阿司匹林、氯吡格雷）、调脂（瑞舒伐他汀）、改善心肌缺血（美托洛尔）、降压（缬沙坦氨氯地平）、营养心肌等处理
4.待上级医师指导进一步诊治
</诊疗计划>
</progress>
