# Supplementary material for: Relation Extraction Based on Fusion Dependency Parsing from Chinese EMRs
Source: Hindawi journal article supplement (doi:10.1155/2020/8658040), 2020-06-08
Supplement: f1 [file 8658040.f1.zip › progress/text/progress110.xml]

<?xml version= "1.0" encoding="UTF-8"?>
<progress>
<病例特点>
1、男性患者，因"右下腹包块2月余。"入院。
2、患者缘于2月前无明显诱因发现右下腹有一包块，平卧时不消失，包块出现时无疼痛、会阴部疼痛、发热、恶心、呕吐、腹泻、便血等。。遂至我院门诊就诊，查体后建议手术治疗。
门诊遂以"右侧腹股沟疝"收住院。
自发病以来，病人精神状态较差，体力情况较差，食欲食量一般，睡眠情况良好，体重无明显变化，大便正常，小便正常。
4、辅助检查：暂无
</病例特点>
<初步诊断>
1.右侧腹股沟疝2.帕金森综合征3.左侧腹股沟疝修补术后
</初步诊断>
<诊疗计划>
1.积极完善相关检查，评估患者心肺功能情况；
2.依据检查结果制定下一步治疗计划。
</诊疗计划>
</progress>
