# Supplementary material for: Relation Extraction Based on Fusion Dependency Parsing from Chinese EMRs
Source: Hindawi journal article supplement (doi:10.1155/2020/8658040), 2020-06-08
Supplement: f1 [file 8658040.f1.zip › progress/text/progress111.xml]

<?xml version= "1.0" encoding="UTF-8"?>
<progress>
<病例特点>
1、女性患者，，因"腹痛、腹胀、排气排便停止4天，伴恶心呕吐1天。"入院。
2、患者4天天前无明显诱因出现腹痛、腹胀、排气排便停止，呈阵发性加剧，疼痛无放射，昨日开始感恶心，伴呕吐3次，呕吐后腹痛减轻，呕吐物为胃内容物。
患者于2014-08-14行腹腔镜下直肠癌根治术（Hartmman）+广泛粘连松解术。
现来我院就诊行平片示：腹部多发小肠肠管积气、扩张，考虑肠梗阻。
门诊以"肠梗阻"收入院。
患者自发病以来无寒战、高热，精神状态一般，体力情况一般，食欲食量较差，睡眠情况一般，体重无明显变化，小便正常。
4、辅助检查：2015年10月17日腹部平片；
1、腹部多发小肠肠管积气、扩张，本院血常规：WBC：4.3*109/L中性粒75%淋巴细胞13.2%红细胞3.9*10^12/LHB127g/L
</病例特点>
<初步诊断>
1.肠梗阻2.直肠癌根治术后
</初步诊断>
<诊疗计划>
1.完善相关检查2.予禁食，补液对症治疗
</诊疗计划>
</progress>
