# Supplementary material for: Relation Extraction Based on Fusion Dependency Parsing from Chinese EMRs
Source: Hindawi journal article supplement (doi:10.1155/2020/8658040), 2020-06-08
Supplement: f1 [file 8658040.f1.zip › progress/text/progress112.xml]

<?xml version= "1.0" encoding="UTF-8"?>
<progress>
<病例特点>
（1）老年女性患者，间断性双下肢水肿3年余，规律血透1年余，咳嗽、咳痰4天。
（2）患者3年余前活动后出现下肢水肿，并进行性加重，后复查白蛋白：26g/L，尿素：31.05mmol/L，肌酐：499umol/L，eGFR14.5ml/min；
考虑为“肾病综合征CKD5期”，于2014-01-04行右颈内长导管置入术，并开始规律血液透析治疗（每周2次）。
4天后逐渐出现咳嗽、咳白色粘痰，痰粘不易咳出，无发热，无胸闷、心慌、气短，无尿频、尿急、尿痛，无排尿困难、肉眼血尿。
（4）辅助检查：暂缺。
</病例特点>
<初步诊断>
1.肾病综合征CKD5期维持性血透2.肺炎可能3.冠心病心律失常-窦性心动过缓I永久起搏器植入术后心功能II级（NYHA）4.高血压病3级极高危组5.颈椎病
</初步诊断>
<诊疗计划>
1.肾脏内科护理常规；
II级护理；
2.患者因入院时存在咳嗽、咳白色粘痰，双肺可闻及散在湿性啰音，考虑肺部感染，故予以莫西沙星覆盖G-菌，并查痰培养。
辅以血液透析、红细胞生成素改善贫血、硝苯地平控释、哌唑嗪及奥美沙坦酯控制血压、阿托伐他汀调脂、氯比格雷抗聚、氨溴索化痰。
3.完善相关检查：血常规、肝肾功能、电解质、心肌酶谱、血凝、D-dimer、粪常规、尿常规、心电图、胸部CT。
4.关注结果回复。
</诊疗计划>
</progress>
