# Supplementary material for: Relation Extraction Based on Fusion Dependency Parsing from Chinese EMRs
Source: Hindawi journal article supplement (doi:10.1155/2020/8658040), 2020-06-08
Supplement: f1 [file 8658040.f1.zip › progress/text/progress113.xml]

<?xml version= "1.0" encoding="UTF-8"?>
<progress>
<病例特点>
（1）中年女性患者，咳嗽、咳痰6月余，发热10天。
（2）患者于6月前无诱因后突然出现咳嗽、咳痰，无发热、寒战、气短、痰中带血，无盗汗、消瘦、胸闷、胸痛。
遂于当地医院行“血液学”、“影像学”等检查，诊断为“贫血”“肺炎”“右锁骨上淋巴结肿大”，后于上海市瑞金医院、上海市胸科医院等多家医院就诊，治疗效果不明显。
近10天来出现发热症状，最高体温38.5℃，于我院门诊就诊，予“左氧氟沙星”“头孢类”药物治疗后，体温下降。
为求进一步诊治，门诊以“肺炎”收入我科。
自发病来，食欲较好，精神状态好，体重无明显变化，大便正常，小便正常。
（3）既往史：8年前行“剖宫产”手术；
1年前行“子宫息肉切除术”；
有青霉素过敏史；
否认肝炎、结核、疟疾病史，否认高血压、心脏病史，否认糖尿病、脑血管疾病、精神疾病史，否认外伤、输血史，否认食物过敏史，预防接种史随当地。
（5）辅助检查：见大病历。
</病例特点>
<初步诊断>
肺炎
</初步诊断>
<诊疗计划>
1.二级护理常规；
控烟宣教；
健康宣教；
2.经验性抗感染（目前“社区获得性肺炎”诊断明确，院外感染，结合病情考虑主要以肺炎链球菌、流感嗜血杆菌、卡他莫拉菌等感染为主，予以阿莫西林克拉维酸钾经验性抗感染治疗，待痰病原学检查回报后进一步调整治疗方案）；
3.化痰及控制血压等相关对症支持治疗；
4.进一步完善相关检查（必需检查项目：（1）血常规、尿常规、大便常规；
（2）肝肾功能、血糖、电解质、血沉、C反应蛋白（CRP）、感染性疾病筛查（乙肝、丙肝、梅毒、艾滋病等）；
（3）病原学检查及药敏；
（4）胸部正侧位片、心电图。
根据患者情况进行：血培养、血气分析、胸部CT、D-二聚体、血氧饱和度、B超、有创性检查等。
）。
</诊疗计划>
</progress>
