# Supplementary material for: Relation Extraction Based on Fusion Dependency Parsing from Chinese EMRs
Source: Hindawi journal article supplement (doi:10.1155/2020/8658040), 2020-06-08
Supplement: f1 [file 8658040.f1.zip › progress/text/progress114.xml]

<?xml version= "1.0" encoding="UTF-8"?>
<progress>
<病例特点>
患者男，69岁，因“右膝疼痛伴活动受限半年。”入院。
患者于入院前半年前，右膝重负荷活动下，出现右膝关节疼痛，肿胀，弹响，当时未予处理，之后右膝一直疼痛，并肿胀、弹响、交锁，活动障碍，膝关节负重行走时明显，不负重行走时症状缓解。
于2015-09-14在门诊就诊，查膝关节MR检查示右膝关节内侧半月板损伤。
给予保守治疗，后患者症状无明显缓解，遂来门诊复诊，为求进一步积极治疗，门诊拟”左膝关节内外侧半月板损伤”收治入院。
自发病以来，病人精神状态良好，体力情况良好，食欲食量良好，睡眠情况良好，体重无明显变化，大便正常，小便正常。
辅助检查：2015年07月14日；
右膝MR：内侧半月板后角损伤；本院
</病例特点>
<初步诊断>
左膝关节内外侧半月板损伤
</初步诊断>
<诊疗计划>
</诊疗计划>
</progress>
