# Supplementary material for: Relation Extraction Based on Fusion Dependency Parsing from Chinese EMRs
Source: Hindawi journal article supplement (doi:10.1155/2020/8658040), 2020-06-08
Supplement: f1 [file 8658040.f1.zip › progress/text/progress115.xml]

<?xml version= "1.0" encoding="UTF-8"?>
<progress>
<病例特点>
（1）老年女性患者，外伤右侧胸闷、胸痛3天。
（2）患者3天前不慎跌倒，当时即感右侧胸部疼痛，吸气时明显，伴胸闷气短，无出冷汗，无晕厥，无明显呼吸困难，无痰中带血，无头痛、恶心及呕吐，无腹痛，于外院就诊，行胸片提示："右侧多发肋骨骨折"。
予对症处理，近两日患者胸痛无明显缓解，胸闷加重，伴气急，来我院急诊就诊摄胸部CT：1、右侧胸腔大量积液2右侧多发肋骨骨折，为进一步治疗，收入我科。
发病以来，患者精神萎，胃纳差，未解二便，近期体重无明显下降。
（4）辅助检查：
胸部CT：1、右侧胸腔大量积液，伴右肺下叶肺不张，右肺下叶支气管狭窄2、右肺中叶及左肺下叶纤维灶3、心脏增大，主动脉及冠状动脉硬化4、甲状腺两侧叶囊状低密度灶5、食管下端管壁稍增厚6、肝脏囊肿灶。7、右侧多发肋骨骨折后改变。
</病例特点>
<初步诊断>
1.闭合性胸外伤，右侧多发肋骨骨折，血胸2.高血压病Ⅲ级，极高危组3.冠状动脉粥样硬化性心脏病
</初步诊断>
<诊疗计划>
1胸外科护理常规。
2完善相关检查，胸部CT、心电图。
3胸腔闭式引流。
4抗生素预防感染、化痰治疗。
</诊疗计划>
</progress>
