# Supplementary material for: Relation Extraction Based on Fusion Dependency Parsing from Chinese EMRs
Source: Hindawi journal article supplement (doi:10.1155/2020/8658040), 2020-06-08
Supplement: f1 [file 8658040.f1.zip › progress/train/progress1.xml]

<?xml version= "1.0" encoding="UTF-8"?>
<progress>
<病例特点>
（1）64岁男性患者，反复胸痛、心悸13年，加重半天
（2）患者缘于13年前无明显诱因感心前区疼痛及心悸，无恶心、呕吐，无大汗，无晕厥、黑朦。
无放射痛，无闷痛，不随呼吸、咳嗽、吞咽、体位改变加重，无眩晕、晕厥，持续约数分钟不等，曾在当地医院行心脏ECT及冠脉造影检查提示未见异常，后仍间断胸痛，每月2-3次不等，未予重视。
昨夜间开始患者出现在此胸痛，心前区，入睡后未感疼痛，晨起再次感胸痛，持续数小时无缓解，伴心悸不适，但无出汗，无晕厥及黑朦，无消瘦、食欲减退、纳差，至我院就诊，行心电图检查提示：窦性心律，频发房早三联律，T波改变（IIIIIAVFV5-6），胸部CT提示未见异常，肝脏多发囊肿，肝左叶斑点状钙化灶。
血常规、血糖，肾功能正常，电解质血钾3.2mmol/l，D-二聚体正常，脑钠肽前体正常，为求进一步治疗，门诊以"心律失常"收入我科，发病以来食欲较好，精神休息较好，体力较好，体重无明显变化，大便正常，小便正常。
（4）辅助检查：
检查日期：2015年10月02日；
项目：生化、心电图，胸部CT；
结果：心电图检查提示：窦性心律，频发房早三联律，T波改变（IIIIIAVFV5-6），胸部CT提示未见异常，肝脏多发囊肿，肝左叶斑点状钙化灶。
血常规、血糖，肾功能正常，电解质血钾3.2mmol/l，D-二聚体正常，脑钠肽前体正常.；
检查单位：本院
既往史：否认肝炎、结核、疟疾、血吸虫病史，有高血压病史20年，最高145/95mmHg，平素服用波依定，缬沙坦40mg/qd，平素血压控制可。
否认心脏病史，否认糖尿病、脑血管疾病、精神疾病史，否认手术、输血史，其父亲有磺胺类药物过敏史，预防接种史随当地。
</病例特点>
<初步诊断>
1.心律失常，频发房早2.高血压病1级（高危）
</初步诊断>
<诊疗计划>
1、心内科护理常规，II级护理，低盐低脂饮食；
2、完善相关检查（三大常规、血凝、肝肾功能、电解质、血糖、血脂、甲状腺功能、心电图、Holter、动态血压、心超、胸片、B超等）；
3、予营养心肌、抗心律失常治疗。
</诊疗计划>
</progress>
