# Supplementary material for: Relation Extraction Based on Fusion Dependency Parsing from Chinese EMRs
Source: Hindawi journal article supplement (doi:10.1155/2020/8658040), 2020-06-08
Supplement: f1 [file 8658040.f1.zip › progress/train/progress2.xml]

<?xml version= "1.0" encoding="UTF-8"?>
<progress>
<病例特点>
患者男，62岁，因“DVR术后3年，胸闷、气促2月余”入院。
患者3年前因二尖瓣脱垂伴重度反流及主动脉瓣反流在我科行二尖瓣及主动脉瓣置换术，术后恢复可，出院后长期服用华法林，近2月余无明显诱因下反复发作胸闷、气促，以夜间发作次数较多，不能平卧，无明显胸痛、放射痛，无晕厥、黑朦，间歇伴有心慌、双下肢水肿，自行服用托拉塞米，无明显好转，遂就诊于我院门诊。
查心超提示：全心扩大，左室收缩功能重度减退，人工机械二尖瓣轻度瓣周反流，肺动脉高压伴轻中度三尖瓣反流；
心电图提示：房扑伴不规则房室传导。
现为求进一步诊治收入我科。
患者发病以来，精神可，胃纳可，夜眠差，二便可，体重无明显减轻。
辅助检查：检查日期：
项目：
结果：
检查单位：
2015年03月26日，心电图：房扑伴不规则房室传导，；本院
</病例特点>
<初步诊断>
</初步诊断>
<诊疗计划>
</诊疗计划>
</progress>
