# Supplementary material for: Relation Extraction Based on Fusion Dependency Parsing from Chinese EMRs
Source: Hindawi journal article supplement (doi:10.1155/2020/8658040), 2020-06-08
Supplement: f1 [file 8658040.f1.zip › progress/train/progress3.xml]

<?xml version= "1.0" encoding="UTF-8"?>
<progress>
<病例特点>
（1）老年女性患者，反复胸闷4年。
（2）患者于此次入院4年前无明显诱因下出现反复胸闷，与活动有关，持续数分钟后可自行缓解，无发热，无胸痛、放射痛，无心悸、大汗，无黑朦、晕厥，无咳嗽、咳痰，无咯血，无气促、呼吸困难，无反酸、烧心，否认夜间阵发性呼吸困难，否认端坐呼吸，无颜面四肢水肿，当时曾于我院就诊，行冠脉造影术明确血管病变，并于病变血管植入支架2枚（具体不详），术顺。
术后规律服药，无明显胸闷痛发作，无气促、呼吸困难，无颜面四肢水肿。
现为进一步复诊收入我科病房。
（4）辅助检查：暂缺
</病例特点>
<初步诊断>
1.冠状动脉粥样硬化性心脏病，PCI术后，心功能I级(NYHA)2.高血压病2级，极高危组3.2型糖尿病
</初步诊断>
<诊疗计划>
1、心内科护理常规；
2、予抗血小板聚集、调酯、扩冠、营养心肌、改善循环等治疗；
3、完善相关检查：血常规、生化、心电图、心超等。
</诊疗计划>
</progress>
