# Supplementary material for: Relation Extraction Based on Fusion Dependency Parsing from Chinese EMRs
Source: Hindawi journal article supplement (doi:10.1155/2020/8658040), 2020-06-08
Supplement: f1 [file 8658040.f1.zip › progress/train/progress4.xml]

<?xml version= "1.0" encoding="UTF-8"?>
<progress>
<病例特点>
（1）女性患者，59岁，因“右侧颞顶枕胶质母细胞瘤术后3月余，头晕1周”入院。
（2）患者因右侧颞顶枕胶质母细胞瘤于2015-4-9在我院神经外科行手术治疗，术后予以抗感染等治疗，后于2015.4.28在上海市411医院行伽马刀治疗。
近1周来患者出现头晕，伴恶心，未呕吐，无癫痫发作。
病程中患者神志清楚，精神萎靡，食欲不振，大、小便正常。
（3）既往史：无糖尿病、高血压病史；
否认冠心病、脑卒中史；
否认肝炎、结核等传染病史；
2015.4.9因右侧颞顶枕胶质母细胞瘤在我院行手术治疗，否认其他手术及外伤史，否认食物、药物过敏史，有输血史，血型为O型Rh阳性。
（5）辅助检查：头颅MRI：右颞顶枕胶质母细胞瘤术后复发。
（2015-5-27，同济医院，RIS：136401000363284）
</病例特点>
<初步诊断>
</初步诊断>
<诊疗计划>
1、神经外科护理常规；
2、予以脱水减轻脑水肿、营养支持、止吐等治疗；
3、进一步完善各项检查（血常规、肝肾功能、血糖、血电解质、输血前常规、血凝常规、胸片、心电图、心超等以了解患者身体一般情况）；
查血流变以评估有无心脑血管意外因素，查头颅增强MRI，了解颅内占位变化情况；
4、病情随时有变化，加重可能向家属告知。
</诊疗计划>
</progress>
