# Supplementary material for: Relation Extraction Based on Fusion Dependency Parsing from Chinese EMRs
Source: Hindawi journal article supplement (doi:10.1155/2020/8658040), 2020-06-08
Supplement: f1 [file 8658040.f1.zip › progress/train/progress5.xml]

<?xml version= "1.0" encoding="UTF-8"?>
<progress>
<病例特点>
（1）患儿，女，3岁；
因“咳嗽2月余，加重2伴发热1天”入院。
（2）患儿入院2月前出现咳嗽，为阵发性连声咳，无痰，以晨起、夜间为主，无气喘、气急、呼吸困难，家属未予特殊处理。
入院1天前患儿咳嗽加重，有痰，不易咳出，有发热，体温未测，家属予小儿清热止咳颗粒口服后，体温可降至正常。
入院当天上午患儿再次发热，体温未测，于大华门诊就诊，查血常规示白细胞升高，为求进一步诊治，来我院门诊就诊，胸片示"两肺纹理增多，阅片示右肺内带见斑片状密度增高影"，故以"支气管炎"收入院。
（4）辅检：；
2015年11月12日；
血常规：WBC29.3×109/L，N84.1%，Ly10.1%，RBC5.0×1012/L，HBG144g/L，PLT408×109/L，CRP15.7mg/L；外院；
2015年11月12日；
胸片：两肺纹理增多，阅片示右肺内带见斑片状密度增高影；本院
</病例特点>
<初步诊断>
支气管炎
</初步诊断>
<诊疗计划>
1、一般治疗：保持一定的室温，空气湿度，注意避免接触冷空气、变应原，多休息，多饮水，合理膳食。
2、抗感染：患儿有咳嗽、发热，血常规示白细胞比值增高，病原考虑细菌感染，不排除支原体感染，予阿奇霉素联合头孢比肟抗感染治疗。
3、对症支持治疗：患儿止咳、化痰、补液等对症支持治疗。
4、完善相关检查：三大常规＋CRP，肺炎支原体明确病原，肝肾功能了解脏器功能且协助用药等。
</诊疗计划>
</progress>
