# Supplementary material for: Relation Extraction Based on Fusion Dependency Parsing from Chinese EMRs
Source: Hindawi journal article supplement (doi:10.1155/2020/8658040), 2020-06-08
Supplement: f1 [file 8658040.f1.zip › progress/train/progress6.xml]

<?xml version= "1.0" encoding="UTF-8"?>
<progress>
<病例特点>
（1）48岁女性患者，乏力、腹胀16年，腰痛伴发热1周
（2）患者于16年前无明显诱因出现乏力、腹胀、食欲减退、低热，恶心、呕吐、厌油腻、腹胀、腹泻，于外院就诊，行B超检查提示肝硬化，无鼻衄、齿龈出血、皮肤瘀点、瘀斑，无月经过多、闭经、乳房发育疼痛，诊断"肝硬化，肝功能失代偿期"。
1周前五明显诱因出现腰痛伴发热，至外院就诊，查血培养提示大肠埃希菌检出，后患者渐出现双下肢浮肿，左下肢较重，腹胀较前明显加重，全身多发瘀斑，腰背部水肿，伴咳嗽、咳痰，心悸，呼吸急促，给予怕珠沙星、阿莫西林抗感染，保肝、利尿对症支持治疗未见明显好转，为进一步诊治而入院。
（3）既往史：否认肝炎、结核、疟疾、血吸虫病史，否认高血压、心脏病史，否认脑血管疾病、精神疾病史，糖尿病史15年，皮下注射胰岛素30R16u早餐前12U晚餐前控制，控制情况不详，否认手术、外伤、输血史，否认食物、药物过敏史，预防接种史随当地。
（5）辅助检查：检查日期：
项目：
结果：
检查单位：
2015年10月07日；
血培养：大肠埃希菌检出；本院；
2015年10月08日；
B超：下肢动静脉未见明显异常；本院；
2015年10月08日；
腰椎MR：L5/S1椎间盘膨出，腰椎退行性变；本院；
2015年10月10日；
头颅MR：1.两侧额叶皮层下缺血灶2.颅脑MRA未见明显异常；本院
</病例特点>
<初步诊断>
</初步诊断>
<诊疗计划>
1、消化内科护理常规，I级护理，健康教育；
注意休息，加强营养。
饮食以高热量、高蛋白；
食管静脉曲张者避免进食粗糙、坚硬食物。
2、利尿（螺内酯、呋塞米、托拉塞米）、保肝（门冬氨酸鸟氨酸），考虑患者现存在败血症，故给予美罗培南抗感染，补充电解质、营养支持等治疗，注意维持水电解质平衡。
4、完善相关检查，进一步评估病情及预后：胃镜、呼吸试验、血常规、尿常规、粪常规+隐血、肝肾功能、电解质、肝炎免疫（乙肝、丙肝）、消化道肿瘤指标等。
5、向患者家属告知病情，目前考虑肝硬化失代偿期，合并有脾大、脾亢、食管静脉曲张，且患者合并有高血压、冠心病、糖尿病等基础疾病，随时可能发生上消化道大出血、感染性休克、电解质紊乱等，进而诱发急性脑梗塞、急性心梗等，甚至猝死，预后极差，家属表示理解。
</诊疗计划>
</progress>
