# Supplementary material for: Relation Extraction Based on Fusion Dependency Parsing from Chinese EMRs
Source: Hindawi journal article supplement (doi:10.1155/2020/8658040), 2020-06-08
Supplement: f1 [file 8658040.f1.zip › progress/train/progress7.xml]

<?xml version= "1.0" encoding="UTF-8"?>
<progress>
<病例特点>
（1）49岁男性患者，间断性上腹部隐痛2月余
（2）患者于2月前无明显诱因出现上腹部隐痛，空腹及餐后无明显变化，服用抗酸药后可缓解，有夜间痛，无反酸、烧心、腹胀、腹泻、恶心、呕吐、食欲减退、体重减轻、消瘦、乏力、面色苍白，物发冷、寒战、发热、皮肤巩膜黄染。
2月前于当地医院就诊，查胃镜提示胃多发性溃疡、慢性胃炎、十二指肠球炎，给予兰索拉唑等药物治疗后稍缓解，仍有隐痛，性质同前，无腹胀、恶心、呕吐、呕吐宿食、呕血、排黑粪，10-7复查胃镜示：糜烂性胃炎、胃多发性息肉、十二指肠球部溃疡，为进一步诊治而入院，以十二指肠溃疡收入院。
（3）既往史：否认肝炎、结核、疟疾、血吸虫病史，否认高血压、心脏病史，否认糖尿病、脑血管疾病、精神疾病史，否认外伤、输血史，既往因鼻衄行鼻骨部分切除术，否认食物、药物过敏史，预防接种史随当地。
（5）辅助检查：检查日期：
项目：
结果：
检查单位：
2015年08月22日；
胃镜：胃多发性溃疡、慢性胃炎、十二指肠球炎；本院；
2015年08月22日；
胃镜：糜烂性胃炎、胃多发性息肉、十二指肠球部溃疡；本院
</病例特点>
<初步诊断>
</初步诊断>
<诊疗计划>
1、消化内科护理常规，II级护理，健康教育；
注意休息，加强营养。
建立良好的生活习惯，避免烟、酒及服用非甾体抗炎药。
2、对症治疗：抑酸或抗酸药、促胃肠动力药、胃黏膜保护药等。
3、完善相关检查：三大常规、肝肾功能、电解质、上腹部超声、呼吸试验、消化道肿瘤指标等。
</诊疗计划>
</progress>
