# Supplementary material for: Relation Extraction Based on Fusion Dependency Parsing from Chinese EMRs
Source: Hindawi journal article supplement (doi:10.1155/2020/8658040), 2020-06-08
Supplement: f1 [file 8658040.f1.zip › progress/train/progress8.xml]

<?xml version= "1.0" encoding="UTF-8"?>
<progress>
<病例特点>
（1）48岁女性患者，下腹隐痛1月余。
（2）患者1月余前无明显诱因下出现下腹隐痛，伴尿频，无恶心、呕吐，无咳嗽、咳痰，无胸闷、心悸，无肛门坠胀感，无发热，无腹泻、黄疸等不适，患者今来院就诊，妇科查体发现盆腔巨大包块，上缘达脐下1指，拟“盆腔肿物”收入院。
自发病来精神一般，胃纳可，睡眠好，尿频，无尿痛、排尿困难，大便正常，否认短期体重进行性加重或减轻。
（3）既往史：否认高血压、心脏病史，否认糖尿病、脑血管疾病、精神疾病史。
否认肝炎、结核、疟疾、血吸虫病史。
预防接种史不详。
幼时曾行阑尾切除术，1999年行胆囊切除术，2012年右腓骨骨折。
否认输血史。
否认食物、药物过敏史。
（5）辅助检查：暂无。
</病例特点>
<初步诊断>
1.盆腔肿物2.宫内节育器
</初步诊断>
<诊疗计划>
1.完善相关检查：血常规、血凝常规、肝肾功能、TCT、B超等；
2.先行取环，后行盆腔MRI进一步明确诊断，并了解包块与周围组织关系；
3.积极术前准备，择期手术。
</诊疗计划>
</progress>
