# Supplementary material for: Relation Extraction Based on Fusion Dependency Parsing from Chinese EMRs
Source: Hindawi journal article supplement (doi:10.1155/2020/8658040), 2020-06-08
Supplement: f1 [file 8658040.f1.zip › progress/train/progress9.xml]

<?xml version= "1.0" encoding="UTF-8"?>
<progress>
<病例特点>
患者女，36岁，因“经皮肾镜碎石取石术后11月余，。
”入院。
患者在近1年前反复出现无诱因性的双侧腰部酸痛，发作时无尿频尿急尿痛，曾于外院就诊，诊断为双肾鹿角形结石，于2014年11月行右侧经皮肾镜碎石取石术，2015年2月行左侧经皮肾镜碎石取石术，术后预后较差，右侧拔管后反复漏液，近日患者发现右侧漏液加重，查肌酐升高，B超示：右肾结石，即来我院就诊，诊断为"右肾结石，双肾积水，重度肾性贫血"收住入院。
患者发病来无畏寒，发热，大便正常，无明显的消瘦，精神一般，胃纳可。
辅助检查：
</病例特点>
<初步诊断>
1.右肾结石2.双肾积水3.重度肾性贫血
</初步诊断>
<诊疗计划>
1、完善各项检查；
2、口服药物对症治疗，预防感染；
3、择期手术治疗。
4、输血治疗补充血容量。
</诊疗计划>
</progress>
