# Supplementary material for: Relation Extraction Based on Fusion Dependency Parsing from Chinese EMRs
Source: Hindawi journal article supplement (doi:10.1155/2020/8658040), 2020-06-08
Supplement: f1 [file 8658040.f1.zip › progress/train/progress10.xml]

<?xml version= "1.0" encoding="UTF-8"?>
<progress>
<病例特点>
1、男性患者，因"无明显诱因上腹部疼痛1年余，加重1周。"入院。
2、患者缘于1年前因无明显诱因后出现上腹部疼痛，无放射，疼痛随体位变化无加重，无上腹饱胀、呃逆、纳差，未行任何治疗。
之后症状间断发作。
1周前无明显诱因因再次出现上腹部疼痛，程度加剧，当时无腰背部放散痛、皮肤巩膜黄染、恶心、呕吐、寒战、高热、腹泻、血便、无咳嗽、咳痰，无胸闷、气短、尿频、尿急、尿痛、血尿，随至我院就诊，行彩超检查，结果提示胆囊炎、胆囊颈部结石、胆汁淤积可能，左肾结石。
建议手术治疗。
为求进一步治疗，来我院，门诊以"结石性胆囊炎"收住。
发自病来，精神休息较好，体力较好，体重无明显变化，大便正常，小便正常。
4、辅助检查：
2015年10月15日；
彩超：胆囊炎、胆囊颈部结石、胆汁淤积可能，左肾结石；本院
</病例特点>
<初步诊断>
胆囊结石伴胆囊炎
</初步诊断>
<诊疗计划>
1.积极完善相关检查2.择期手术治疗
</诊疗计划>
</progress>
