# Supplementary material for: Relation Extraction Based on Fusion Dependency Parsing from Chinese EMRs
Source: Hindawi journal article supplement (doi:10.1155/2020/8658040), 2020-06-08
Supplement: f1 [file 8658040.f1.zip › progress/train/progress11.xml]

<?xml version= "1.0" encoding="UTF-8"?>
<progress>
<病例特点>
（1）59岁男性患者，反复发作性胸闷胸痛1年半。
（2）患者本次入院前1年半无明显诱因下出现发作性胸闷胸痛，位于心前区，呈隐痛，无放射痛，无头晕头痛，无意识障碍，无心悸冷汗，无恶心呕吐，无咳嗽咳痰，无腹痛腹泻等不适，既往心电图提示“室上性心动过速”，具体不详，2014年5月曾于我院行“射频消融术”。
术后3月患者仍有反复胸闷胸痛症状，自诉曾行心电图提示“室上性心动过速、房颤”，口服“美托洛尔缓释片”治疗，现为进一步手术治疗，门诊以"心律失常"收入我科。
发病以来精神可，胃纳、睡眠尚可，体力尚可，大小便无殊，体重无明显变化。
（4）辅助检查：暂无。
既往史：患者有高血压病史6年，血压最高140/90mmHg，口服“氨氯地平”降压，自诉血压控制可。
否认肝炎、结核、疟疾、血吸虫病史，否认心脏病史，否认糖尿病、脑血管疾病、精神疾病史，曾因“右下肢静脉曲张”手术治疗，因“疝气”手术治疗，对染发剂过敏，预防接种史随当地。
</病例特点>
<初步诊断>
1.心律失常，阵发性室上性心动过速，阵发性心房纤颤，心功能Ⅱ级（NYHA）；
2.高血压病1级，高危组
</初步诊断>
<诊疗计划>
1、心内科护理常规，II级护理，低盐低脂饮食；
2、完善相关检查（三大常规、血凝、肝肾功能、电解质、血糖、血脂、甲状腺功能、心电图、Holter、动态血压、心超、胸片、B超等）；
3、控制心室率（美托洛尔缓释片），利尿降低循环负荷（呋塞米、螺内酯），营养心肌、改善循环（辅酶Q10、长春西汀、左卡尼汀、环磷腺苷葡胺），抑酸护胃（兰索拉唑）等治疗；
4、请示上级医师拟定进一步诊疗方案。
</诊疗计划>
</progress>
