# Supplementary material for: Relation Extraction Based on Fusion Dependency Parsing from Chinese EMRs
Source: Hindawi journal article supplement (doi:10.1155/2020/8658040), 2020-06-08
Supplement: f1 [file 8658040.f1.zip › progress/train/progress12.xml]

<?xml version= "1.0" encoding="UTF-8"?>
<progress>
<病例特点>
1、患者中年女性，因“说话变慢、行走困难1周”于2015-10-1916：21入院。
2、本次在安静状态下突然发病，主要症状为说话变慢、行走困难，无进行性加重过程症状。
不伴有头痛、呕吐及意识障碍。
3、就诊与治疗经过：患者1周前无明显诱因出现说话变慢，并出现右下肢走路时疼痛，放射痛，右脚不能踏地，右下肢外侧绷紧感，未就诊治疗。
今日患者在家属陪同下至我院就诊，既往外院头颅MRI（2015-10-15）示未见明显异常，现为进一步诊治，收入我科。
4、既往有脑血管病危险因素：高血压。
5、一般内科
6、神经系统专科
7、辅助检查：见入院录。
</病例特点>
<初步诊断>
</初步诊断>
<诊疗计划>
1、神经内科护理常规，病情告知、卒中健康教育及戒烟指导，饮食指导；
2、抗血小板聚集治疗（氯吡格雷、奥扎格雷）；
3、改善微循环，改善脑代谢（丹参酮、桂哌奇特）；
4、拟行颈部血管超声、头/颈MRA/CTA检查以评估颅内外血管情况；
5、行腰椎间盘MRI明确椎间盘突出情况。
6、评估卒中危险因素及基本脏器功能：血脂检查、糖代谢检查、同型半胱氨酸、血凝常规、生化、心电图、超声等；
ANCA及免疫检查排除血管炎及自身免疫性疾病可能，肿瘤标志物检查以排除瘤卒中可能，心脏超声、Holter检查排除阵发性房颤、心脏粘液瘤、心脏瓣膜病等心源性卒中可能；
</诊疗计划>
</progress>
