# Supplementary material for: Relation Extraction Based on Fusion Dependency Parsing from Chinese EMRs
Source: Hindawi journal article supplement (doi:10.1155/2020/8658040), 2020-06-08
Supplement: f1 [file 8658040.f1.zip › progress/train/progress13.xml]

<?xml version= "1.0" encoding="UTF-8"?>
<progress>
<病例特点>
（1）老年男性患者，反复胸闷3年，加重1月
（2）患者3年前劳累后出现气促，无心悸、胸痛，休息后症状逐渐缓解。
病程中症状反复，2012年至我院就诊，心超示：左房增大，室间隔肥厚（不均匀增厚）。
心电图检查示：左室高电压，提示左房肥大，ST段改变（I、II、AVL、V4、V6下斜型压低0.05-0.25mv），诊断为“肥厚型非梗阻性心肌病”，予对症处理好转后出院。
1月前患者再次出现上述症状加重，夜间需高枕卧位，无发热、胸痛，无下肢浮肿。
现为进一步诊治收治，发病以来食欲尚可，精神休息尚可，体力尚可，体重无明显变化，大便正常，小便正常。
（4）辅助检查：2012-11我院：
心超：左房明显增大；室间隔增厚；轻度二尖瓣反流；升主动脉增宽；轻度肺动脉高压；左室舒张功能减退。
心肺运动检查：运动耐受功能显著减退，通气功能减退。
Holter：窦性心律，总心动数92911次，最高心率138次/分，为窦律及房性心动过速；最低心率49次/分，为窦缓；平均心率68次/分；单个房早599次。房早四联律；房早连发7次，频率87-138次/分；房速3阵，频率130-193次/分，由5-7个心动组成，SNRT最长1.1秒，部分房速伴不规则房室传导；单个室早52次，呈多源性。
插入性室早，室早连发3次，频率为75-136次/分；
室速3阵，频率98-176次/分，由3个心动组成，其一种形态为室性并行心律；
CMV5导联ST段下斜型压低小于等于4.2mm，T波倒置。
</病例特点>
<初步诊断>
1.肥厚型非梗阻性心肌病，心律失常——频发房早，心功能Ⅱ--Ⅲ级（NYHA）2.高血压病3级极高危组3.慢性支气管炎
</初步诊断>
<诊疗计划>
1.心内科护理常规，二级护理；
2.完善三大常规、血生化、心肌酶、ProBNP、Holter、心超进一步评估病情；
3.予抗聚（阿司匹林）、改善心室重构（美托洛尔）、稳定心率（美西律）、利尿（托拉塞米）、改善循环等治疗。
</诊疗计划>
</progress>
