# Supplementary material for: Relation Extraction Based on Fusion Dependency Parsing from Chinese EMRs
Source: Hindawi journal article supplement (doi:10.1155/2020/8658040), 2020-06-08
Supplement: f1 [file 8658040.f1.zip › progress/train/progress14.xml]

<?xml version= "1.0" encoding="UTF-8"?>
<progress>
<病例特点>
（1）94岁男性患者，反复发作头晕10余年，咳嗽2天。
（2）患者于10余年前起反复出现头晕，多次测血压偏高，最高约170/80mmHg，无恶心、呕吐，无黑朦、意识丧失，予正规服药治疗（氯沙坦钾50mgqd），后血压控制尚可，头晕症状发作减少，血压控制良好。
本次入院前2天，患者无明显诱因下出现咳嗽，少量白痰，无气促、呕吐、反酸、胸闷、胸痛、黑矇、意识丧失等，为进一步诊治，门诊以“高血压，肺部感染”收入我科。
自发病来，食欲一般，精神状态欠佳，体重无明显变化，大便正常，小便正常。
（4）辅助检查：暂缺。
既往史：否认肝炎、结核、疟疾、血吸虫病史，6年前曾有腔梗，未遗留肢体活动不利。
否认心脏病史，有慢性胃窦炎史40余年，否认糖尿病、脑血管疾病、精神疾病史，8年前曾行腹股沟斜疝手术，1年前前因跌倒后出现左侧第10、11肋骨骨折，经保守治疗后好转，否认其他手术、外伤、输血史，否认食物过敏史，有“呋喃唑酮”药物过敏史，预防接种史随当地。
</病例特点>
<初步诊断>
1.高血压病2级极高危组陈旧性脑梗塞2.肺部感染
</初步诊断>
<诊疗计划>
1、心内科护理常规，II级护理，低盐低脂饮食；
2、控制血压，暂以头孢呋辛抗感染、氨溴索化痰；
3、完善相关检查：血常规、电解质。
</诊疗计划>
</progress>
