# Supplementary material for: Relation Extraction Based on Fusion Dependency Parsing from Chinese EMRs
Source: Hindawi journal article supplement (doi:10.1155/2020/8658040), 2020-06-08
Supplement: f1 [file 8658040.f1.zip › progress/train/progress15.xml]

<?xml version= "1.0" encoding="UTF-8"?>
<progress>
<病例特点>
（1）中老年男性患者，发现腹膜后多发淋巴结肿大11月余。
（2）患者于11月余前（2014年10月）着凉后出现发热，体温最高39.1℃，伴咽痛，就诊于当地医院，考虑为“上呼吸道感染”，先后给予静滴“阿奇霉素”、口服“盐酸莫西沙星0.4gQd”治疗后仍有体温反复，遂转至北京人民解放军总医院就诊，入院检查发现腹膜后、小网膜囊内及肝左叶外侧段被膜下等多处淋巴结肿大，腹膜后淋巴结穿刺病理报告(2014.11.20)：淋巴滤泡萎缩，结构模糊，以T细胞增生为主，伴有较多组织细胞及单核样细胞浸润，局灶见少量大细胞成分。
免疫组化染色显示：CD3/CD45RO(T淋巴细胞+)，CD20(B淋巴细胞+)，CD30（大细胞+），Ki-67(10%)，S-100(个别细胞+)，CD21（灶+），CD23(灶+)，CD68(组织细胞+)，CD15(-)，EMA（-），CK（-）。
结合免疫组化结果认为目前诊断肿瘤证据不足，建议随诊，故未予重视，未予治疗。
患者半年前因右上腹不适，就诊于长海医院做进一步检查，PET-CT检查结论(2015.03.23，长征医院)：1.腹膜后多发肿大淋巴结，与胰腺分界不清，考虑恶性病变，建议MRI增强检查；
左锁骨区、右内乳淋巴结、腹膜后淋巴结转移，肝脏多发转移。
2.胃窦部FDG摄取增高。
上腹部增强CT(2015.03.26)、增强MRI(03.27)：胰腺、肝脏、腹膜后、肝门部多发占位，考虑恶性，淋巴瘤或转移瘤可能。
复旦大学附属肿瘤医院病理切片病理学会诊咨询意见：（腹膜后，穿刺活检）淋巴组织增生性病变，以小到中等大T细胞浸润为主，后者有异型性，伴部分浆细胞及组织细胞反应。
结合免疫染色结果，较倾向为T细胞肿瘤性病变（外周T细胞淋巴瘤）。
注：免疫组化结果（HI15-05086）：异型淋巴样细胞CD20-、CD3+、CD8+细胞数量多于CD4+细胞、TIA-1+、Ki-67+（约20-30%）；
散在细胞CD30+；
小B细胞结节CD20+；
CD56-，诊断为“外周T细胞淋巴瘤”，于2015.04.17起予Hyper-CVAD方案化疗，2015.05.29、06.26、07.23、09.11予CHOP方案化疗，本次为继续治疗收住入院。
（4）辅助检查：暂无。
</病例特点>
<初步诊断>
1.外周T细胞淋巴瘤2.高血压病3级，极高危组3.2型糖尿病
</初步诊断>
<诊疗计划>
1、血液科护理常规，II级护理；
2、完善相关检查，评估病情；
3、择期化疗。
</诊疗计划>
</progress>
