# Supplementary material for: Relation Extraction Based on Fusion Dependency Parsing from Chinese EMRs
Source: Hindawi journal article supplement (doi:10.1155/2020/8658040), 2020-06-08
Supplement: f1 [file 8658040.f1.zip › readme.txt]

Due to the privacy of the data set of our medical EMRs, we selected some experimental data as samples to provide to Hindawi. The details of the supplementary materials file are as follows.

1. The discharge folder is the data of discharge summary, which includes the datas of training, test, discharge summry relation and discharge summary entity. 
    The files in the folders of  train and text are the discharge summaries of patients, which are used to train and text models includes  condition of hospitalization, admitting diagnosis, diagnosis and treatment process, discharge diagnosis, hosipital discharge and discharge orders. 
    The files in the folders named dischargeEntity are the medical entities of discharge summaries, every line in the files is correspond with a entity information in discharge summaries, which are tagged with 'C=entity  P=start:end  T=entity type   A=entity assertion', where C represents the concepts of entities in discharge summaries, P means the start and end position of entities in medical EMR texts, T and A stands the type of entities and the modification of entities respectively.
    The files in the folders named dischargeRelation are the entity relations of discharge summaries, every line in the files is correspond with the relaiton between entities in medical discharge summaries, which are tagged with E={entity[strat-end]entity type;...;}||R=||E={entity[strat-end]entity type;...;}, where the first E represents the first entity, including the entity concept, the start-end position and type of entity. Similarly, the second E represents the second entity. And the middle R represents the relation type between the two entities.

2. The progress folder is the data of progress record, which includes the datas of training, test, progress record relation and progress record entity. 
    The files in the folders of  train and text are the progress records of patients, which are used to train and text models includes characteristics of case, preliminary diagnosis and plan of diagnosis. 
    The files in the folders named progressEntity are the medical entities of progress records, every line in the files is correspond with a entity information in progress records, which are tagged with 'C=entity  P=start:end  T=entity type   A=entity assertion', where C represents the concepts of entities in progress records, P means the start and end position of entities in medical progress records, T and A stands the type of entities and the modification of entities respectively.
    The files in the folders named progressRelation are the entity relations of progress records, every line in the files is correspond with the relaiton between entities in progress records, which are tagged with E={entity[strat-end]entity type;...;}||R=||E={entity[strat-end]entity type;...;}, where the first E represents the first entity, including the entity concept, the start-end position and type of entity. Similarly, the second E represents the second entity. And the middle R represents the relation type between the two entities.
